# Supplementary material for: Phenomics reveals a novel putative chloroplast fatty acid transporter in the marine diatom Skeletonema marinoi involved in temperature acclimation
Source: PubMed Central journal article supplement (PMC6805942; doi:10.1038/s41598-019-51683-y), 2019-10-22
Supplement: 41598_2019_51683_MOESM1_ESM.pdf [file 41598_2019_51683_MOESM1_ESM.pdf]

# **Phenomics reveals a novel chloroplast fatty acid transporter in the marine diatom *Skeletonema marinoi* involved in temperature acclimation**

**Oskar N. Johansson<sup>1</sup>, Mats Töpel<sup>2,3</sup>, Jenny Egardt<sup>1</sup>, Matthew I.M. Pinder<sup>2</sup>, Mats X. Andersson<sup>1</sup>, Anna Godhe<sup>2</sup>, and Adrian K. Clarke<sup>1\*</sup>**

<sup>1</sup>Department of Biological and Environmental Sciences, University of Gothenburg, Box 461, 40530 Gothenburg, Sweden.

<sup>2</sup>Department of Marine Sciences, University of Gothenburg, Box 462, 40530 Gothenburg, Sweden.

<sup>3</sup>Gothenburg Global Biodiversity Center (GGBC), Box 461, 40530 Gothenburg, Sweden.

\*Materials and correspondence: Adrian K. Clarke. Department of Biological and Environmental Sciences, University of Gothenburg, Box 461, 40530 Gothenburg, Sweden ([adrian.clarke@bioenv.gu.se](mailto:adrian.clarke@bioenv.gu.se)).

Correspondence should be addressed to A.K.C. ([adrian.clarke@bioenv.gu.se](mailto:adrian.clarke@bioenv.gu.se)).

**Supplementary Figure 1.** Overview of the temperature screening for *S. marinoi* mutant collection.

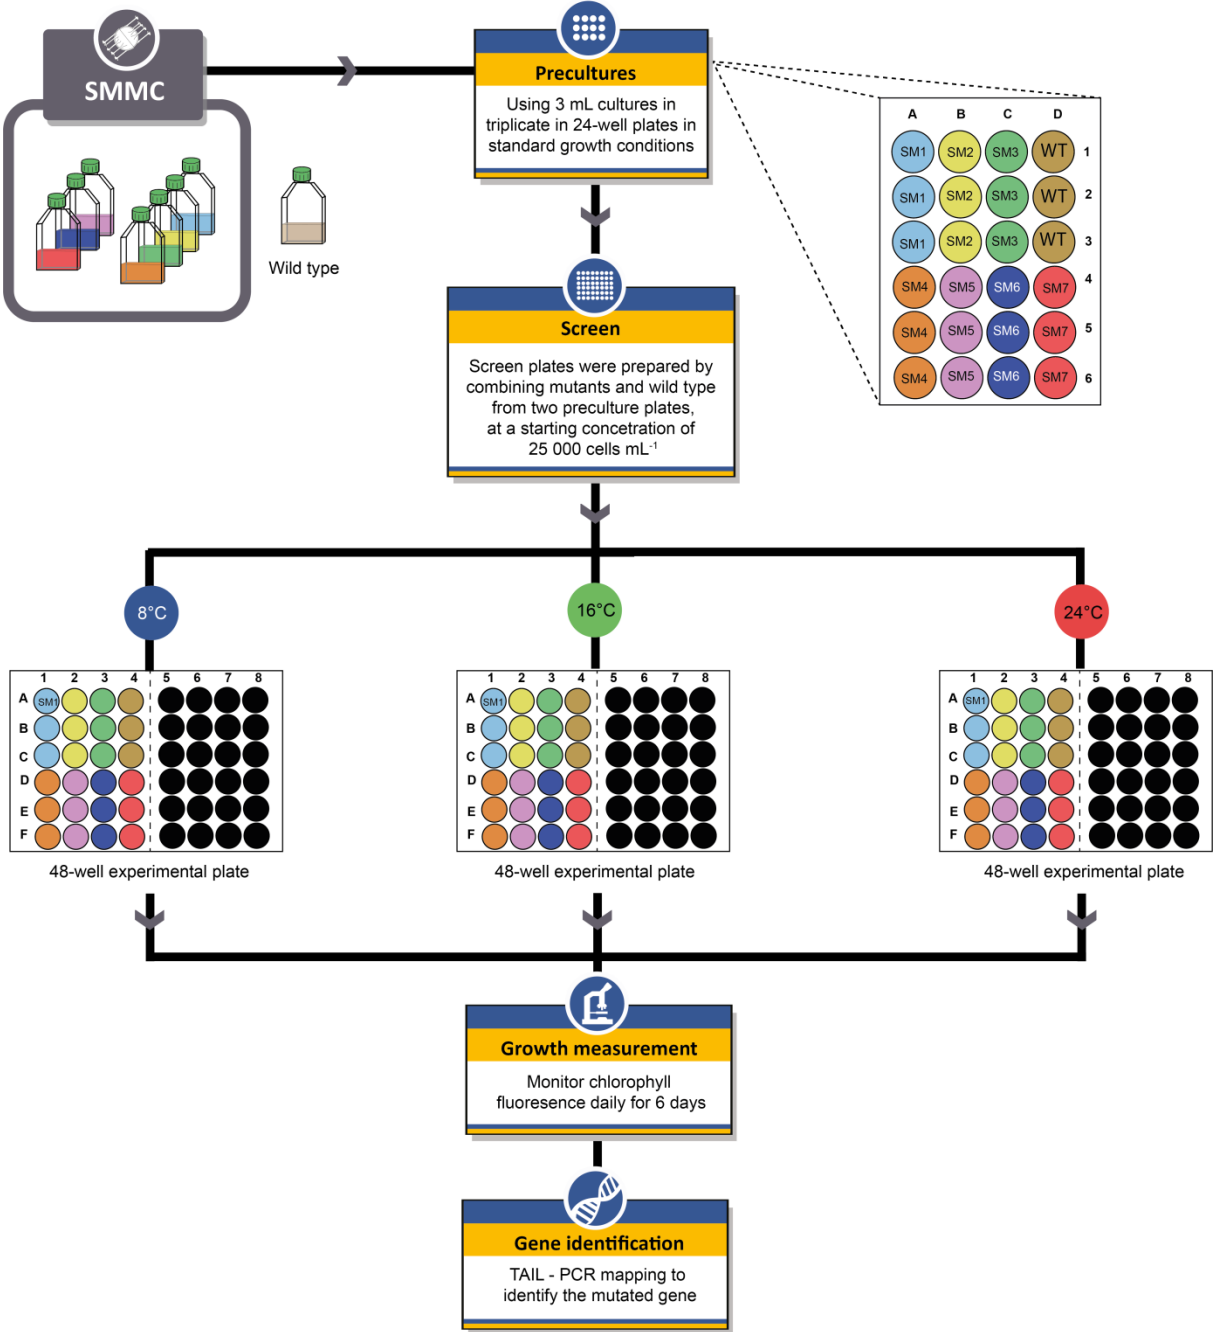

## Supplementary Figure 2. List of primers

| Primer                          | Sequence (5'->3')                             |
|---------------------------------|-----------------------------------------------|
| <b>TAIL-PCR</b>                 |                                               |
| <i>Insert specific primers</i>  |                                               |
| <b>Promoter</b>                 |                                               |
| pISP[1]                         | CCTGCGAAATCATCCTCCACAAAATCTCG                 |
| pISP[2]                         | GAGAATCCGAGACGATCTGTCCAGAACTC                 |
| pISP[3]                         | AGCACTGGAACAGCACTTGTCAACTTTGC                 |
| <b>Terminator</b>               |                                               |
| tISP[1]                         | CGAGATTTTGTGGAGGATGATTTTCGCAGG                |
| tISP[2]                         | GAATGGTCTGAAGTAGTGTCTACAAATTTCCGTG            |
| tISP[3]                         | GCGTGCATTTCTGTGGCAGAAGAGCAAG                  |
| <i>Degenerate primers</i>       |                                               |
| Fusion-1                        | GGGCACGTCTACTATAGGGCACGCGTGGTNTCGASTWTSGWGTT  |
| Fusion-2                        | GGGCACGTCTACTATAGGGCACGCGTGGTNGTCGASWGANAWGAA |
| Fusion-3                        | GGGCACGTCTACTATAGGGCACGCGTGGTWGTGNAGWANCANAGA |
| Fusion-4                        | GGGCACGTCTACTATAGGGCACGCGTGGTAGWGNAGWANCAWAGG |
| Fusion-5                        | GGGCACGTCTACTATAGGGCACGCGTGGTNGTAWAASGTNTSCAA |
| Fusion-6                        | GGGCACGTCTACTATAGGGCACGCGTGGTNGACGASWGANAWGAA |
| Fusion-7                        | GGGCACGTCTACTATAGGGCACGCGTGGTGTNCGASWCANAWGTT |
| Fusion-8                        | GGGCACGTCTACTATAGGGCACGCGTGGTNCAGCTWSCTNTSCTT |
| <i>Amplicon specific primer</i> |                                               |
| ASP1                            | GGGCACGTCTACTATAGGGC                          |
| ASP2                            | ACTATAGGGCACGCGTGGT                           |
| <b>Genotyping</b>               |                                               |
| SM127-fwd                       | ACTGGACAAAAATTACTGCAAAGCAAGAGACGGC            |
| SM127-rev                       | ATCCTATCTCCGTTCCATCAACAGATACTTTGACTCCC        |
| <b>qRT-PCR</b>                  |                                               |
| q_Lsu4e_Fwd                     | CATGGGGAAGTGGACGTGCCG                         |
| q_Lsu4e_Rev                     | GGTGTACTTACGGCCACGGGC                         |
| q_fat1_Fwd                      | AACAATTATTCTTGATGGCGTAGCGG                    |
| q_fat1_Rev                      | CGC TCCTGCGATAGTTTTTGCATCC                    |

**Supplementary Figure 3.** Thermal conditions for the modified TAIL-PCR approach used to map the genomic insertion sites in *S. marinoi* transformants.

| Primary reaction (1°) |                   |       | Secondary reaction (2°) |         |       | Tertiary reaction (3°) |         |       |
|-----------------------|-------------------|-------|-------------------------|---------|-------|------------------------|---------|-------|
| Step                  | Temp.             | Time  | Step                    | Temp.   | Time  | Step                   | Temp.   | Time  |
| 1                     | 96°C              | 5 min | 1                       | 98°C    | 20 s  | 1                      | 98°C    | 30 s  |
| 2                     | 98°C              | 10 s  | 2                       | 65°C    | 1 min | 2                      | 98°C    | 10 s  |
| 3                     | 70°C              | 15 s  | 3                       | 72°C    | 2 min | 3                      | 57°C    | 15 s  |
| 4                     | 72°C              | 2 min | 4                       | Go to 1 | 1 x   | 4                      | 72°C    | 2 min |
| 5                     | Go to 2           | 30 x  | 5                       | 94°C    | 20 s  | 5                      | Go to 2 | 14 x  |
| 6                     | 98°C              | 10 s  | 6                       | 68°C    | 1 min | 6                      | 72°C    | 5 min |
| 7                     | 25°C              | 1 min | 7                       | 72°C    | 2 min | 7                      | 4°C     | ∞     |
| 8                     | 72°C              | 2 min | 8                       | 94°C    | 20 s  |                        |         |       |
| 9                     | ramp 0.5 °C / sec |       | 9                       | 68°C    | 1 min |                        |         |       |
| 10                    | Go to 6           | 1 x   | 10                      | 72°C    | 2 min |                        |         |       |
| 11                    | 98°C              | 10 s  | 11                      | 94°C    | 20 s  |                        |         |       |
| 12                    | 70°C              | 15 s  | 12                      | 55°C    | 1 min |                        |         |       |
| 13                    | 72°C              | 2 min | 13                      | 72°C    | 2 min |                        |         |       |
| 14                    | 98°C              | 10 s  | 15                      | 72°C    | 5 min |                        |         |       |
| 15                    | 70°C              | 15 s  | 16                      | 4°C     | ∞     |                        |         |       |
| 16                    | 72°C              | 2 min |                         |         |       |                        |         |       |
| 17                    | 98°C              | 10 s  |                         |         |       |                        |         |       |
| 18                    | 40°C              | 15 s  |                         |         |       |                        |         |       |
| 19                    | 72°C              | 2 min |                         |         |       |                        |         |       |
| 21                    | Go to 10          | 10 x  |                         |         |       |                        |         |       |
| 22                    | 72°C              | 5 min |                         |         |       |                        |         |       |
|                       | 4°C               | ∞     |                         |         |       |                        |         |       |

|                      |      |                                                                                             |
|----------------------|------|---------------------------------------------------------------------------------------------|
| <i>S. marinoi</i>    | 1    | MA-----PSTLTATVGHLLAFLL                                                                     |
| <i>T. oceanica</i>   | 1    | MNFVGVAEKMDADAIESVHPRTPDGDVVEALKRLIADGVSSKGAATPGTLIRFDCKPGGVSVSDGTAGEAPFPSL-----AGALAAVFL   |
| <i>T. pseudonana</i> | 1    | MEQQTSAQRRL-----BRLL-----AGVLL--DLL                                                         |
| <i>S. marinoi</i>    | 19   | ANHQVLANHQRQYASLPSLSRSVAGVYVTSQHNLSNNKSSSSNHLRKTPTICNHNHKFVSTIRG--GALVDPVTKTEFDKDKGN-LSLL   |
| <i>T. oceanica</i>   | 87   | DDDGVSPLRL-----SVVENCCEGVAVAAPAGGSAGVDSG-----GEEAVSIESLESQLSPIKDSAGLISFGPKLEEGMYIA          |
| <i>T. pseudonana</i> | 23   | SNVPLV-----                                                                                 |
| <i>S. marinoi</i>    | 106  | GVGVRRKKGPIKVVSVGVYVNDVAGTIAALPKSNKEGALTTLRESIKSTSKSTTTFELKMSKRVGAEKMAAIAESVDPRTSKDKGA-VE   |
| <i>T. oceanica</i>   | 160  | GCVVRKKGPIKVVYAIAMYSPPKALAAVSS-----GDMNDAARTERTSEVLEMTENVAEKKAAIAIESIRPRYSGSSPDSVE          |
| <i>T. pseudonana</i> | 28   | -----                                                                                       |
| <i>S. marinoi</i>    | 195  | TRKOLLDDGVAAKGA-ATFGTTLDFDCSDEGVKVSVDGTEIGFAP--GLCOAFSDVFLDKDGVSPALRDSIVENSCKRAVAPKSSSSTSD  |
| <i>T. oceanica</i>   | 236  | ALFEALIVAGVNRKGGQADKGTTFRFDCSADGVVSDGSAEPGTASYDGLGALVVOVFTDGRAVSPA----FVSSCKDNWGSPAKRALASS  |
| <i>T. pseudonana</i> | 28   | -----LASSSSRAEFLPESVAGARAS                                                                  |
| <i>S. marinoi</i>    | 282  | RKSSSGDESLESTESTL--IQKKEQAKSKVDVLEVLKAVESKLPVQDAATGVAFDPKLLDDGLYLIGAGSRKRSFKVLYAIAMYASPAV   |
| <i>T. oceanica</i>   | 322  | LMACDDPDAKKTAKTKSKGRAASPAAGGANGGVYAKLAVESRLKPIRDETGVGFAPKLLDDGLYLIGVGARSKFVLYAVSIIYGSPLV    |
| <i>T. pseudonana</i> | 49   | SLSLKHHTSHGLSLNRLRLLRGGASPTSSSTAKLDAEESKLPVQDAATGVSESPKLLDD-LYLVGVGVRRKSTIKTKYAVSMYASPSV    |
| <i>S. marinoi</i>    | 370  | LHFLSSPOLGEBEFOREASIALRNASRA---LDNLS-PTTSFVLNIVFPVDAKTIAGAIKSVQVRGGSSDVELESLTIEGKRRKGGQ     |
| <i>T. oceanica</i>   | 412  | LNATSKPEPDGGRREAAALRNTRARAFNFS-PTTSVVMEMLLAADARTVSGAIDSVRSRYGGAPGSDVLEGITAEGLKGGK--         |
| <i>T. pseudonana</i> | 138  | LNALSSLPSCQHRREAAALRNARL---FDNNSAKTIEVLEMMVGVDAKSIASATGDSIKPKRYGSDTIEGLESIAEGLSKGGQ         |
| <i>S. marinoi</i>    | 456  | ANKGTLRFDCSKVGVSVVDGNGLOGIARNDLGRALVDVMDERKAVSPHLESCIKRWCCARA--FTHELEOCKRASKSVKPGFDPFR      |
| <i>T. oceanica</i>   | 499  | AARGKILRFDCSEAGVAVSVGDALVGIASSRGLASAFVDVMDERAVSPGLIDSCLDITWRGRDAVDLSALILEEHVRVTKAIGRPRGDPFR |
| <i>T. pseudonana</i> | 225  | ASKGTVRFDCSEDDGVDSVDGKLGSSAKFKVGSFAFVDVETDDNAVSPSLVDSCTDNLSEPAKLSLSEALLEKVMVTAETSVASNGQSPR  |
| <i>S. marinoi</i>    | 544  | LRLKTDPSSTPLASLISKYYLSVPTSDGQ-VLGLTSDQRHNRKLYIEGPNLEQPIORSLISYITEQDFDKLVRILLVVAWVSAPFGLL    |
| <i>T. oceanica</i>   | 589  | VOLKTDPSSTIPKLSLKYILNVPALDKRLLGLTEQDRQRYVA-VYGNELDOPQORSLSFSTIEQDFDKLVRILLVVAWVSAPFGLL      |
| <i>T. pseudonana</i> | 315  | LRVKSQDPSSTIPIALLSKRYLNVPISTSNKSLGLLAPTRERHNRKLYVYGNELQPPERTLMSYITEQDFDKLVRILLVVAWVSAPFGLV  |
| <i>S. marinoi</i>    | 633  | EVKKEVGEWGHLELLOPLKAPLHLHGHGDDSSHSHTKSS-IADEVVKEAKNLLSGKT-ESEKLEDFGKIDLEALVEPIVITITLIVINA   |
| <i>T. oceanica</i>   | 678  | ELKKEEMDVAGQMLHHLIG----LHFGEA-GGFSASAS-IADEVVNEATTIVGHSGDDTLEKLIKIKHVEALVEPIVITITLIVINA     |
| <i>T. pseudonana</i> | 405  | ELKKEEMGEWGHLELLOPLVRRMTG-KGSGDAESAPPTSSSTWIASQVVEAKNIVSSEGAQSDGADHFGVKHLEALVEPIVITITLIVINA |
| <i>S. marinoi</i>    | 721  | LVGGYQSLNASKGISALKQMAKAVVRCRG-NDVDEVELDASSLVPGDVVRLSVGQKIPADIRLVSSTSTFTVDEACLTGESDSVA       |
| <i>T. oceanica</i>   | 761  | LVGGYQSLDASKGISALKQMAKAVIRVSSGDSRSTFDEVEVDSSSLVPGDVVRLSVGQKIPADIRLVSSTSTFTVDEACLTGESDSVA    |
| <i>T. pseudonana</i> | 494  | LVGGYQSLNASKGISALKQMAKAVIRVHOEKRSALDEVEVDASSLVPGDVVRLVGGQKIPADIRLVSSTSTFTVDEACLTGESDQVP     |
| <i>S. marinoi</i>    | 810  | KIPYKGDNRNDMONG-G-GTMGANSNGMLYGGTVITAGKGLGVVVRTGMDTEMGKIQRGVTEAASDEAHRTPLAIKLEDFGDKLTHII    |
| <i>T. oceanica</i>   | 851  | KIPYKGDPAKDPAPEG-GSSGMEFASGMLYGGTVITSGKGLGVVVRTGMSTEMGKIQRGVTEAASDENARTPLGKLEDFGDMLSVYII    |
| <i>T. pseudonana</i> | 584  | KIPYKGDVONDEEHNGHGVGSMGXHANGMLYGGTVITAGKGLGVVVRTGMDTEMGKIQCGVTEAASDENARTPLAIKLEDFGDKLTVYII  |
| <i>S. marinoi</i>    | 898  | GHCIVGVWVASIPKFDPTFKQIEGAVYYAKVAVALGVAAL-ORLPAVITLCLSLGTRRMAKRNIVRKLPSVETLGCSTSVICTDKTGT    |
| <i>T. oceanica</i>   | 940  | GHCIAVWVASIPRFDPMFKRSPVEGAVYYAKVAVALGVAALPEGLPAVITLCLSLGTRRMAKRNIVRKLPSVETLGCSTSVICTDKTGT   |
| <i>T. pseudonana</i> | 674  | GVICAVWVASIPKFDPTFRPTIEGAVYYAKVAVALGVAALPEGLPAVITLCLSLGTRRMAKRNIVRKLQSVETLGCSTSVICTDKTGT    |
| <i>S. marinoi</i>    | 987  | LTTNEMTAVSLVLEDNS----IVEEHAIISGVSYSEPTIDGIEHSVEIQNNEFGALADVAASALCNDAITVGNDAKPAKCTYERIGE     |
| <i>T. oceanica</i>   | 1030 | LTTNEMTAVSLVLEDNS----YVVEEHSISGVSYSPVGTVDGVEHEVELRNPHGAVADAAVSSLCNDAIRKGNNEPGETVKAEDRIGE    |
| <i>T. pseudonana</i> | 764  | LTTNEMTAVSLVLEDSDEEGGVLYAEHEVSGSYSEPTITGVOHSEIADNPKGSVDVAVAALCNDAITVGNNEPKAASCTYERIGE       |
| <i>S. marinoi</i>    | 1073 | PTEAALCVLAEKLGKRSKASTSESTRSSANVNVWRTEHESQATLEFNDRKMSVLSN---ASSRGNRLLVKGAFNLLERCTHAKI        |
| <i>T. oceanica</i>   | 1115 | PTEAALCVLAEKLGKRSK-KRSSLNDSQASANVNSWRSAHPRTATLEFNDRKMSVLAPEHPPTSSDKGNRLLVKGAFNLLERCTHAKI    |
| <i>T. pseudonana</i> | 854  | PTEAALCVLAEKLGGRVSTESTAPQPLASANVNCWRLLDHPQATLEFNDRKMSVLSANW---SSSEGNRLLVKGAFNLLERCTHAKI     |
| <i>S. marinoi</i>    | 1160 | RDGKIVKLDGKLRQIEQKTELATRLRCLALAVKETNOLEQSLREYSQE-ADNDRHPLLSDPQNYASIESGLTWGVMGKIDPARPE       |
| <i>T. oceanica</i>   | 1204 | RDGSVVKLDGKLRQIEQKTELASRLRCLGLAVKESANLEQSLRTYSQEDSSPEDECHPLLSDPQNYASIEGLTWGVMGKIDPARPE      |
| <i>T. pseudonana</i> | 941  | RDGIVVKLDGKLRQIEQKTELATRLRCLALAVKETDLEESLRTYSVDEADDCARHPLLSDPQNYAKIESGLTWGVMGKIDPARPE       |
| <i>S. marinoi</i>    | 1249 | VAESINKCHAAQVVRVIMITGDARTAVAIARDVNILPPSSSGQVVKAYEGREFFVKPEKEQLLELA--GNMFCRAEFPDKQRLIKMLQS   |
| <i>T. oceanica</i>   | 1294 | VANAIKCHDAGVVRVIMITGDARTAVAIARDVNILPPASLGHQIKAYEGREFFKPDDEQLQLLSPGNMVFCAEAPDKQRLIKMLQS      |
| <i>T. pseudonana</i> | 1031 | VADSIKCHCAGVVRVIMITGDARTAVAIARDVNILPPASSGMIKAYEGREFFKPESEQLQLLSPGNMVFCAEAPDKQRLIKMLQS       |
| <i>S. marinoi</i>    | 1338 | QGETIAMTGD-----GVNDAPALQOASIGIAMGISGTEVSKEADMVLADDNFSTIVAALDEGRSTIYNNMQAFICFLISCNIGEIAAILF  |
| <i>T. oceanica</i>   | 1384 | LDEISAMTGNFYQFHCVSDAPALQOANIGIAMGIGTEVSKEADMVLADDNFSTIVAAVEGRSTIYNNMQAFICFLISCNIGEIAAILF    |
| <i>T. pseudonana</i> | 1121 | LGETIAMTGD-----GVNDAPALQOASIGIAMGISGTEVSKEADMVLADDNFSTIVAAVEGRSTIYNNMQAFICFLISCNIGEIAAILF   |
| <i>S. marinoi</i>    | 1423 | NAVCGFPEPLSAMHLLWVNLVTDGPPATALGFNPPADVVMQKPRPSDEPIMTKMAFRYLVTGLVYVGTAVGVSFVGHYLSQGVTLHQLS   |
| <i>T. oceanica</i>   | 1474 | SNLCGFPEPLSAMHLLWVNLVTDGPPATALGFNPPADVVMQKPRPSNEPIMTKMAFRYLVTGLVYVGTAVGVSFVSYLTDQGSIKLQLR   |
| <i>T. pseudonana</i> | 1206 | SAVCGFPEPLSAMHLLWVNLVTDGPPATALGFNPPADVVMQKPRPSNEPIMTKMAFRYLVTGLVYVGTAVGVSFVGHYRSQGVTLHQLS   |
| <i>S. marinoi</i>    | 1513 | SWGKCDQWNSPPDGVTCSLFGQVGRELPQTLSTLVLMELFKALSAVSVSSLETVGPNQNPWLAVAGVAFPLHVAVYVSSKLGLEPG      |
| <i>T. oceanica</i>   | 1564 | SWGKCDQWNSPPDGVTCDLSLFGQVGRELPQTLSTLVLMELFKALSAVSVSSLLAVGPNQNPWLAVAGVAFPLHVAVYVSSKLGLEPG    |
| <i>T. pseudonana</i> | 1296 | SWGKCDQWNSPPDGVTCDLSLFGQVGRELPQTLSTLVLMELFKALSAVSVSSLLSVGPNQNPWLMTGVAVPLHVAVYVSSKLGLEPG     |
| <i>S. marinoi</i>    | 1603 | LAKSFGLVPLSLHDWETALKWSAPILVIEEHLKRFGRK-R-----                                               |
| <i>T. oceanica</i>   | 1654 | LAKSFGLVSWA-----RVHRCQRR--V                                                                 |
| <i>T. pseudonana</i> | 1386 | LAKSFGLV-RSLHDWETALKWSAPILVIEEMLKAAGRHRTMQSEAKQIIV                                          |

**Supplementary Figure 4.** Amino acid sequence alignment of the *S. marinoi* FAT1 protein with the orthologs in *T. oceanica* and *T. pseudonana*. The sequence from *T. pseudonana* consists of several ORF predictions (generated using the program getorf in the EMBOSS v6.3.1 package) grafted together after putative intron sequences where removed. Conserved sites are indicated by a black background, and similar amino acids by a grey background.

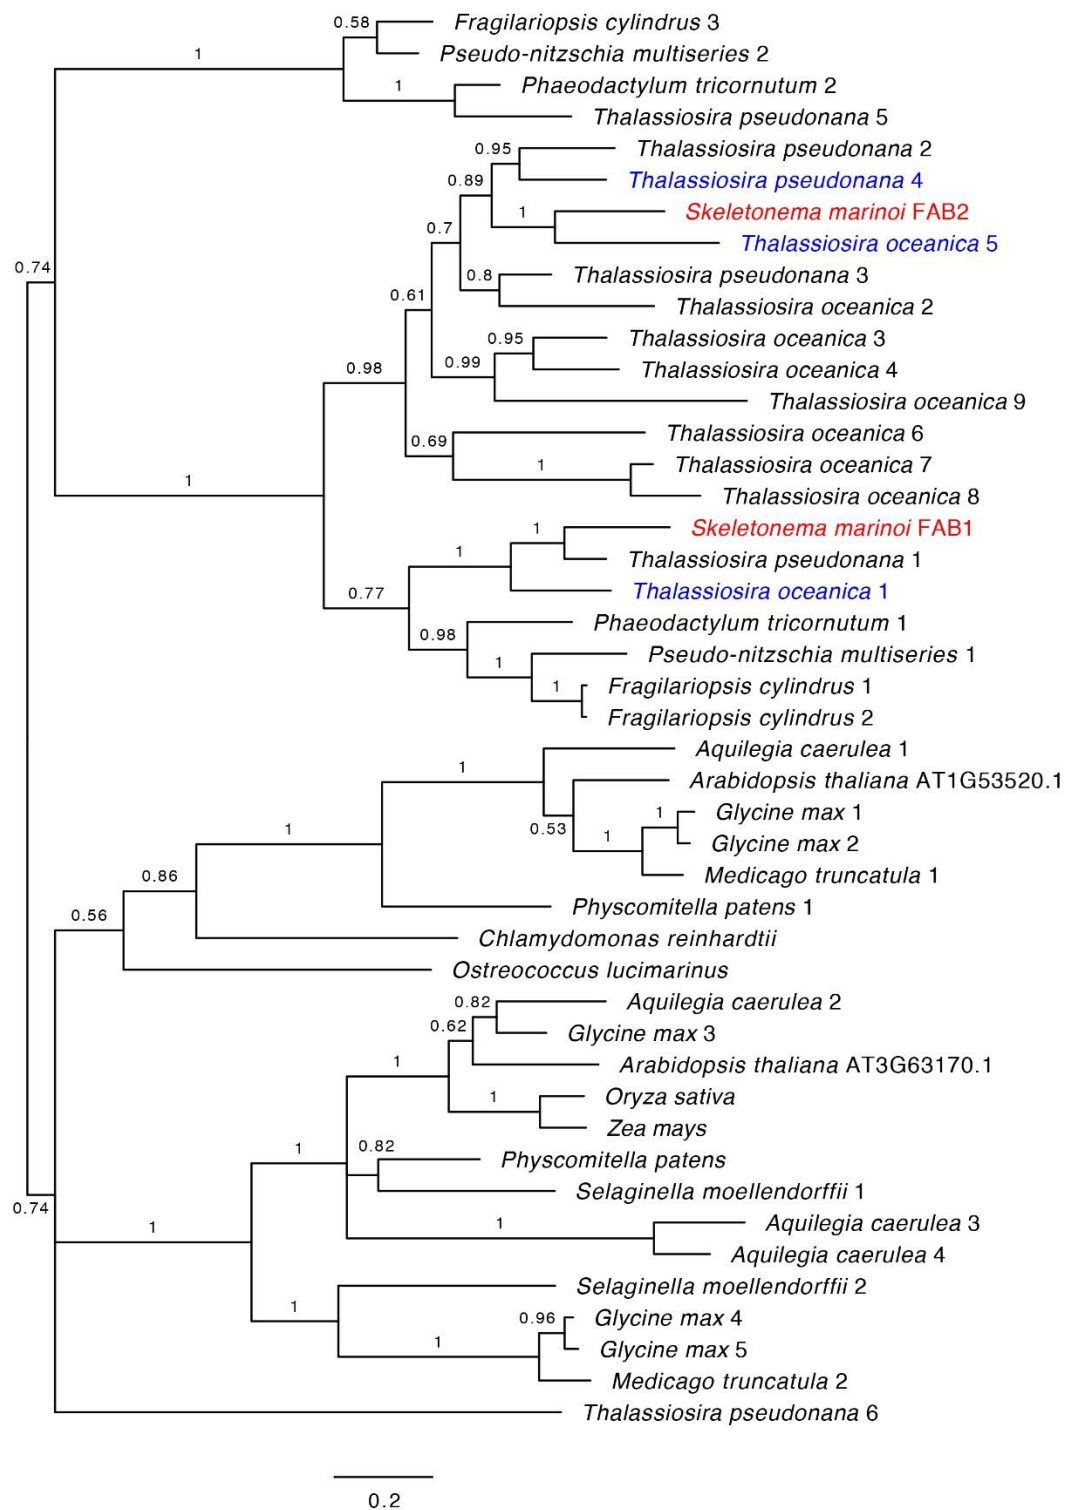

**Supplementary Figure 5.** Unrooted phylogenetic tree of the fatty acid-binding (FAB) domains presented in supplementary table SX. Highlighted in red are the two FAB regions found in the *S. marinoi* FAT1 protein. Highlighted in blue are the three domains from *T. oceanica* and *T. pseudonana* that are part of the proteins shown in Supplementary Figure 4. Posterior probability values appear above the branches, and the expected number of changes per site along the branches is indicated by the scale bar.

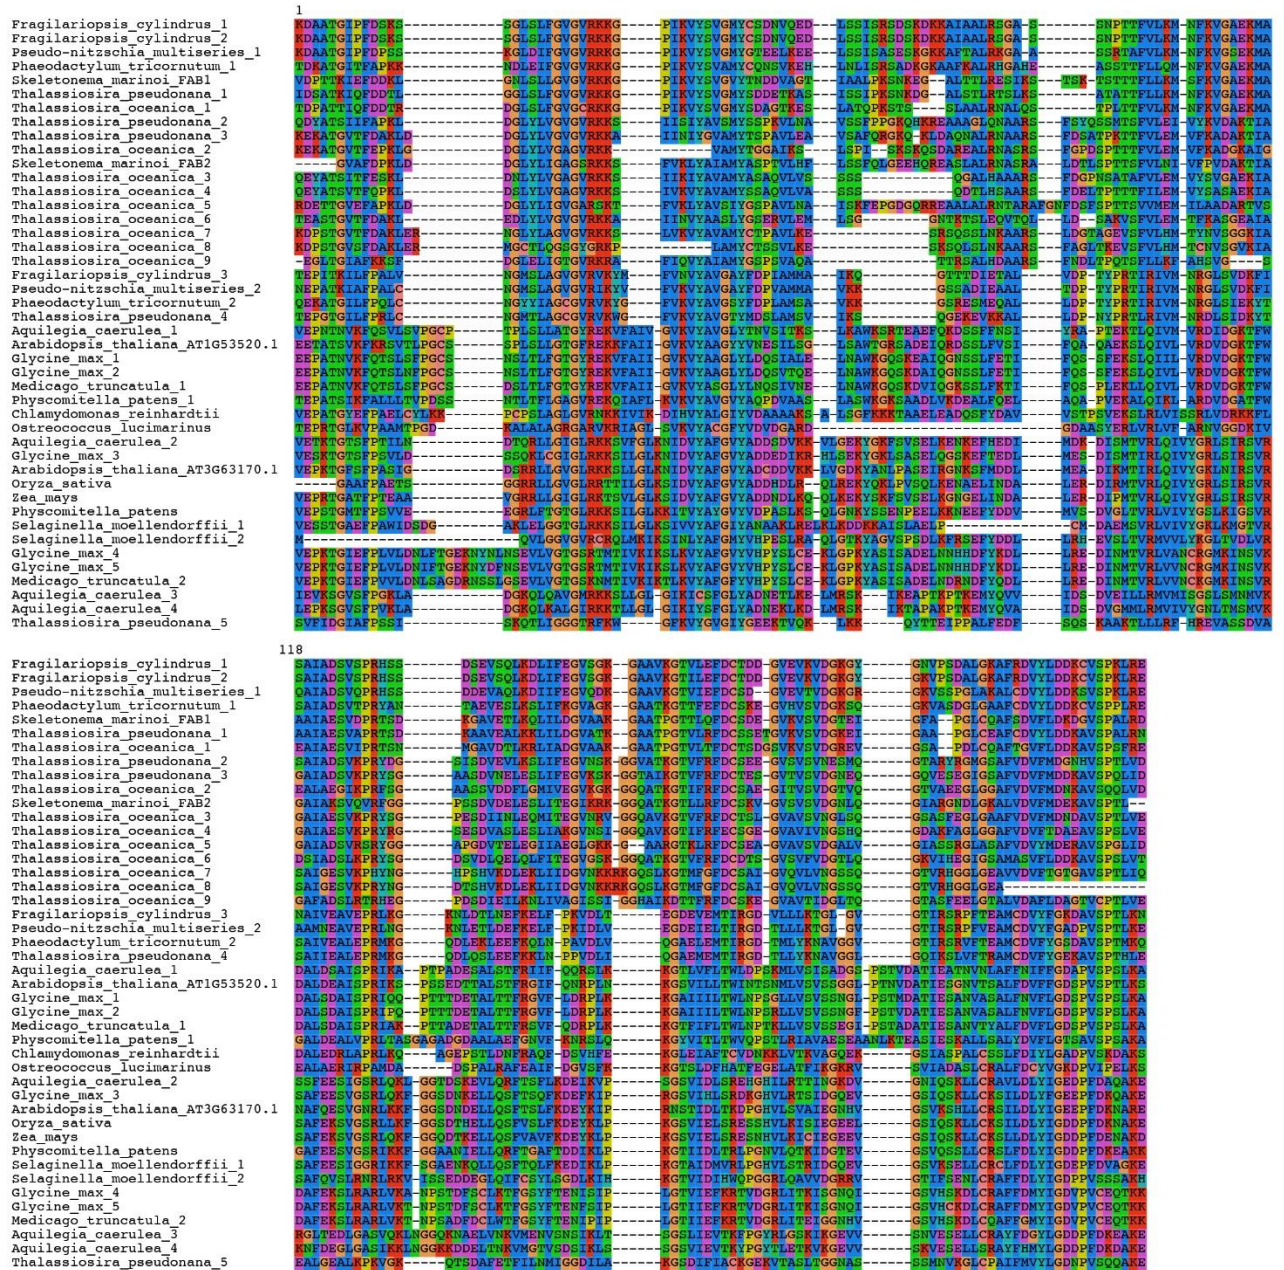

**Supplementary Figure 6.** Alignment of the FAB domains identified in green algae, land plants and diatoms and used for the phylogenetic analysis presented in Supplementary Figure 5. The length of the sequences has been adjusted to the length of the two domains found in *S. marinoi*. Numbers above the sequences indicate the positions in the alignment and the background color of the letters indicates size, shape, solubility, and ionization properties of the different amino acids.

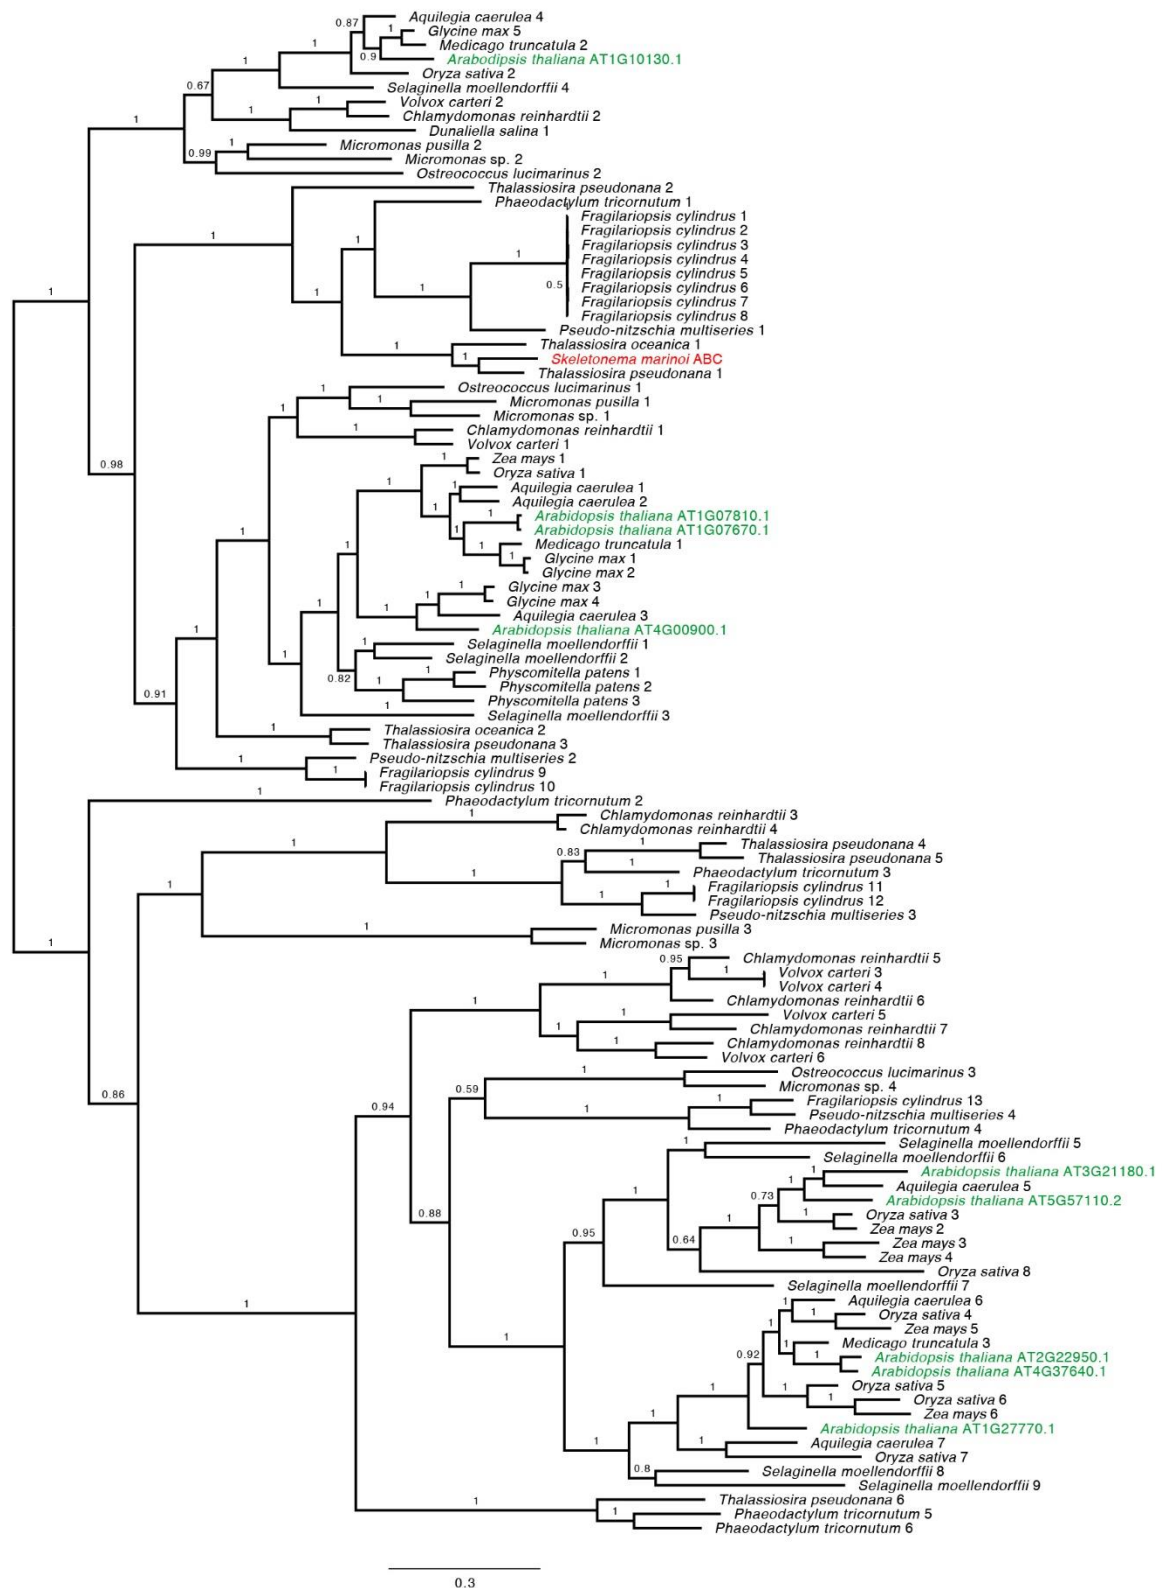

**Supplementary Figure 7.** Unrooted phylogenetic tree of the ABC transporter domains presented in Supplementary Table SX. The position of the *S. marinoi* sequence is highlighted in red and eight homologous domains found in *Arabidopsis thaliana* are highlighted in green. Posterior probability values appear above the branches, and the expected number of changes per site along the branches is indicated by the scale bar.



|                                 | 1       |      |      |          |       |  |         |          |                                   |
|---------------------------------|---------|------|------|----------|-------|--|---------|----------|-----------------------------------|
| Skeletonema_marinoi_ABC         | YLSVPTS | DDGQ | V    | LGLTS    |       |  | QDRHNR  | LKYIFGPN | ELEQP                             |
| Thalassiosira_pseudonana_1      |         |      |      |          |       |  |         |          |                                   |
| Thalassiosira_oceanica_1        | YLNVPAL | DKG  |      | KTLGLTE  |       |  | QDRQRRV | AVYGKN   | ELDQP                             |
| Phaeodactylum_tricornutum_1     |         |      |      | EGLSE    |       |  | SQASARL | VQFGKN   | SLEQS                             |
| Fragilariopsis_cylindrus_1      | TT      | TT   | DDNY | LF       | NGLSS |  | TKAKQLL | EIYGKN   | ELQDL                             |
| Fragilariopsis_cylindrus_2      |         |      |      | LF       | NGLSS |  | TKAKQLL | EIYGKN   | ELQDL                             |
| Fragilariopsis_cylindrus_3      |         |      |      |          |       |  |         |          |                                   |
| Fragilariopsis_cylindrus_4      | TT      | TT   | DDNY | LF       | NGLSS |  | TKAKQLL | EIYGKN   | ELQDL                             |
| Fragilariopsis_cylindrus_5      | TT      | TT   | DDNY | LF       | NGLSS |  | TKAKQLL | EIYGKN   | ELQDL                             |
| Fragilariopsis_cylindrus_6      |         |      |      |          | GLSS  |  | TKAKQLL | EIYGKN   | ELQDL                             |
| Fragilariopsis_cylindrus_7      | TT      | TT   | DDNY | LF       | NGLSS |  | TKAKQLL | EIYGKN   | ELQDL                             |
| Fragilariopsis_cylindrus_8      |         |      |      |          |       |  |         | RIYGKN   | ELQDL                             |
| Pseudo-nitzschia_multiseriata_1 |         |      |      |          |       |  |         |          |                                   |
| Thalassiosira_pseudonana_2      |         |      |      | MH       | TGLSN |  | QQASALI | SOIGPN   | SLOPP                             |
| Ostreococcus_lucimarinus_1      | DS      | D    |      | ET       | VGLAS |  | ASVDDRR | RAGGHN   | ELERE                             |
| Zea_mays_1                      | GV      | S    |      | AD       | RGLSS |  | EEAAARL | QRHGPN   | ELERH                             |
| Oryza_sativa_1                  | GV      | A    |      | AD       | RGLSS |  | EEAAARL | RRYGPN   | ELERH                             |
| Aquilegia_caerulea_1            | KV      | D    |      | KH       | QGLTT |  | QEVEKRC | QIYGLN   | ELEKH                             |
| A.thaliana_AT1G07810.1          | VV      | S    |      | RE       | KGLSS |  | DEVLKRH | QIYGLN   | ELEKP                             |
| A.thaliana_AT1G07670.1          | GV      | S    |      | RE       | KGLST |  | DEVLKRH | QIYGLN   | ELEKP                             |
| Medicago_truncatula_1           | KV      | S    |      | VK       | TGLSH |  | DEVENRR | KIYGFN   | ELEKH                             |
| Glycine_max_1                   | KV      | N    |      | VK       | VGLNP |  | DEVENRR | KIHGLN   | ELEKH                             |
| Glycine_max_2                   | KV      | N    |      | VK       | VGLNH |  | DEVENRR | KIYGLN   | ELEKH                             |
| Aquilegia_caerulea_2            | KV      | D    |      | KE       | LGLRV |  | EDVEERR | KIHGLN   | ELEKH                             |
| Selaginella_moellendorffii_1    | IT      | D    |      | LA       | HGLSK |  | SSVEKRR | ELYGWN   | ELEKE                             |
| Physcomitella_patens_1          | EV      | D    |      | VR       | SGLSQ |  | SSIAKRR | KQYGWN   | ELEKE                             |
| Physcomitella_patens_2          | EV      | D    |      | VK       | SGLSQ |  | SSIENRR | KQYGWN   | ELEKE                             |
| Physcomitella_patens_3          | DV      | D    |      | PK       | KGLSK |  | SVVQSSR | AKYGWN   | ELQKE                             |
| Selaginella_moellendorffii_2    | GV      | D    |      | PS       | KGLSG |  | EEVIARR | ERYGWN   | ELKRE                             |
| Glycine_max_3                   | GV      | K    |      | LD       | KGLST |  | YEVOKRH | EKYGMN   | ELAKE                             |
| Glycine_max_4                   | GV      | K    |      | LD       | KGLST |  | YEVOKRL | EKYGWN   | ELAKE                             |
| Aquilegia_caerulea_3            | NV      | K    |      | LE       | KGLSS |  | YDVENKR | EKCGWN   | ELDKQ                             |
| A.thaliana_AT4G00900.1          | KT      | R    |      | LD       | KGLTS |  | EDVQIRR | OKYGFN   | ELAKE                             |
| Chlamydomonas_reinhardtii_1     | DV      | D    |      | PK       | TGLTD |  | QKVEEKR | ATYGYN   | ELEKE                             |
| Volvox_carteri_1                | DV      | D    |      | VK       | EGLTD |  | EKVAARR | AQYGYN   | ELEKE                             |
| Micromonas_pusilla_1            | GV      | D    |      | PA       | NGLTS |  | AAARDAL | ARHGPN   | ELDKE                             |
| Micromonas_sp_1                 | GV      | D    |      | PE       | TGLDE |  | TKIAKLR | SEYGFN   | ELDKE                             |
| Selaginella_moellendorffii_3    | DV      | D    |      | IS       | KGLNR |  | DAIDKKR | TTYGWN   | ELQKP                             |
| Thalassiosira_oceanica_2        | EV      | D    |      | TA       | VGLSS |  | AQVEARR | AEYGWN   | ELDKE                             |
| Thalassiosira_pseudonana_3      | GV      | D    |      | LS       | KGLST |  | AEVEAKR | EEFGWN   | ELDKE                             |
| Pseudo-nitzschia_multiseriata_2 | KV      | T    |      | LE       | QGLSE |  | ARVEELR | KIHGTN   | ELEHE                             |
| Fragilariopsis_cylindrus_9      | HT      | D    |      | LK       | SGLST |  | DRVHALR | ATYGSN   | ELEKE                             |
| Fragilariopsis_cylindrus_10     | HT      | D    |      | LK       | SGLST |  | DRVHALR | ATYGSN   | ELEKE                             |
| Aquilegia_caerulea_4            | GV      | D    |      | QT       | KGLND |  | SQVANNA | RIYGRN   | VLPQE                             |
| Glycine_max_5                   | GV      | D    |      | PT       | KGLSD |  | AEVVQHA | RLYGKN   | VLAED                             |
| Medicago_truncatula_2           | GV      | D    |      | PT       | KGLSD |  | TQVAQHG | RLYGTN   | VLHED                             |
| A.thaliana_AT1G10130.1          | GV      | D    |      | PT       | KGLSD |  | SQVVHHS | RLYGRN   | VLPEE                             |
| Oryza_sativa_2                  | GV      | D    |      | PT       | KGLSD |  | EQVASGS | KLLVKS   | CCWWSMLGFTAKTSCPKKKNITNTPSVYMSVLI |
| Selaginella_moellendorffii_4    | RV      | D    |      | PS       | HGLAD |  | SQVEEAR | SLYGCN   | GMLQI                             |
| Micromonas_pusilla_2            | GV      | D    |      | PA       | VGLSD |  | REAAALR | ARHGAN   | EMPPE                             |
| Micromonas_sp_2                 | AV      | D    |      | PS       | EGLSA |  | DDVWRLR | RTWGRN   | ELSKG                             |
| Volvox_carteri_2                | NV      | N    |      | LD       | AGLSD |  | TDVFKAR | SRYGRN   | ELAPE                             |
| Chlamydomonas_reinhardtii_2     | NV      | D    |      | LD       | KGLSD |  | TDVFKAR | TRYGRN   | ELAPE                             |
| Dunaliella_salina_1             | HV      | D    |      | LD       | KGLSD |  | RDVQOAR | IKYGRN   | QMEAE                             |
| Ostreococcus_lucimarinus_2      | GV      | LD   |      | LA       | HGLDR |  | ADVQRRR | DACGAN   | ALPAQ                             |
| Phaeodactylum_tricornutum_2     | SV      | D    |      | SSSTOLLS | HWST  |  | ROI     | STLR     | LEFGAN                            |
| Chlamydomonas_reinhardtii_3     | GS      | S    |      | VE       | NGLSD |  | SEAQRRL | QLFGPN   | KLTEV                             |

|                                |        |   |     |        |                 |              |        |       |        |
|--------------------------------|--------|---|-----|--------|-----------------|--------------|--------|-------|--------|
| Chlamydomonas reinhardtii_4    | --GT   | S | AE  | NGLST  | -----           | AEAEERRI     | QDFGPN | ----- | KLTEV  |
| Thalassiosira pseudonana_4     | --GLKE | D | LPK | AGLST  | -----           | DEAASRI      | TKYGP  | ----- | OMTEK  |
| Thalassiosira pseudonana_5     | --SLKD | D | LPK | MGLST  | -----           | EEACDRI      | AKYGP  | ----- | QMAEK  |
| Fragilariopsis cylindrus_11    | --GLPS | D | IRK | KGLTA  | -----           | AEAQARI      | EKYGP  | ----- | KLTTET |
| Fragilariopsis cylindrus_12    | --GLPS | D | IRK | KGLTA  | -----           | AEAQARI      | EKYGP  | ----- | KLTTET |
| Pseudo-nitzschia multiseriis_3 | --DLPA | D | IRK | IGLTT  | -----           | AQAKERI      | EKYGP  | ----- | KLTEK  |
| Phaeodactylum tricorutum_3     | --GCSP | N | SRR | EGLTS  | -----           | QEAARI       | ERYGP  | ----- | QLTEK  |
| Micromonas pusilla_3           | --QT   | D | KV  | KGLTA  | -----           | AEAARKI      | LEDGP  | ----- | ELEKP  |
| Micromonas sp_3                | --QT   | N | AE  | TGLSA  | -----           | AEAARKI      | EEDGP  | ----- | ELEKP  |
| Chlamydomonas reinhardtii_5    | --VT   | D | LH  | AGLNE  | SPAAAAADGLATAAA | SELGSVEAHR   | KAYGP  | ----- | KFPEK  |
| Chlamydomonas reinhardtii_6    | --GT   | D | LK  | EGLSD  | -----           | AGVDSK       | QAFGV  | ----- | SFPEK  |
| Volvox carteri_3               | --CT   | D | LH  | HGLTE  | -----           | QDDKTGVNAHR  | AAYGP  | ----- | TFPEK  |
| Volvox carteri_4               | --CT   | D | LH  | HGLTE  | -----           | QDDKTGVNAHR  | AAYGP  | ----- | TFPEK  |
| Volvox carteri_5               | --GS   | S | PD  | RGLNP  | DPNA            | TGHDSVSEHR   | RIFGN  | ----- | KHAEV  |
| Chlamydomonas reinhardtii_7    | --SS   | S | VE  | SLNA   | DPQA            | AGDSSVLEHR   | RVFGN  | ----- | KHAET  |
| Chlamydomonas reinhardtii_8    | --AT   | S | LH  | EGLDP  | -----           | STVDAHA      | EAYGN  | ----- | KFKET  |
| Volvox carteri_6               | --LS   | D | LH  | KGLDP  | -----           | QGQGLASIEAHV | DAYGN  | ----- | KFPEV  |
| Ostreococcus lucimarinus_3     | --GC   | D | LK  | RGLCD  | RA              | WASEERK      | ESYGV  | ----- | EFEYP  |
| Micromonas sp_4                | --KT   | D | PK  | VGLCG  | TELSE           | ESLARRK      | EAFGV  | ----- | EFEYP  |
| Selaginella moellendorffii_5   | --ST   | S | TK  | NGIED  | EV              | PKIERRR      | LLYGS  | ----- | TYPOQ  |
| A.thaliana_AT3G21180.1         | --KS   | N | ME  | QGINE  | DE              | KEVIDRK      | NAFGS  | ----- | TYPKK  |
| Aquilegia caerulea_5           | --KT   | N | PE  | KGING  | DD              | ADILNRK      | NTFGS  | ----- | TYPKK  |
| A.thaliana_AT5G57110.2         | --KT   | N | PE  | KGISG  | DD              | DDLLKRR      | TIYGS  | ----- | TYPKK  |
| Oryza sativa_3                 | --KT   | D | TE  | KGISG  | DD              | SDLTARR      | NAFGS  | ----- | TYPKK  |
| Zea mays_2                     | --KT   | D | TQ  | KGISG  | DD              | SDLLARR      | NAFGS  | ----- | TYPKK  |
| Zea mays_3                     | --KS   | D | LD  | RGLSP  | DE              | SELMRRR      | DIFGN  | ----- | TYPKK  |
| Zea mays_4                     | --KS   | N | LE  | KGVSP  | NE              | DELLQRK      | NVYGS  | ----- | TYPKK  |
| Selaginella moellendorffii_6   | --HV   | N | LE  | KGIEP  | DE              | ESVOHRR      | EAFGN  | ----- | SYPTK  |
| Selaginella moellendorffii_7   | --KI   | D | PQ  | KGLDA  | TP              | VDIKARR      | DAFGN  | ----- | TYPLK  |
| Aquilegia caerulea_6           | --CT   | S | TA  | NGLTT  | TG              | DLLSRRQ      | EIYGN  | ----- | KFTES  |
| Medicago truncatula_3          | --ST   | S | AT  | EGLSN  | DA              | DLLDKRQ      | QIYGN  | ----- | KFTES  |
| A.thaliana_AT2G22950.1         | --KA   | C | PN  | AGLSTG | EP              | EQLSKRQ      | ELFGN  | ----- | KFAES  |
| A.thaliana_AT4G37640.1         | --KA   | S | PT  | DGLST  | EA              | AQLSQRQ      | ELFGN  | ----- | KFAES  |
| Oryza sativa_4                 | --CT   | S | PE  | DGLPK  | SR              | RRQAVRE      | ELFGN  | ----- | RFAET  |
| Zea mays_5                     | --ST   | S | AS  | DGLDDS | NE              | PMTAARQ      | ELFGV  | ----- | RFAEA  |
| Oryza sativa_5                 | --AT   | S | PA  | DGLST  | AE              | ESIKRRQ      | DVYGN  | ----- | KFTES  |
| A.thaliana_AT1G27770.1         | --ST   | S | IA  | SGIST  | SE              | DLLSVRK      | EIYGN  | ----- | QFTES  |
| Oryza sativa_6                 | --GT   | S | LT  | NGIVT  | DK              | DLLNQRQ      | DIYGN  | ----- | KFAET  |
| Zea mays_6                     | --AT   | S | LA  | DGITT  | DE              | LSLNQRQ      | GMYGN  | ----- | KFTES  |
| Aquilegia caerulea_7           | --SV   | S | LD  | DGVSE  | -----           | KDLPRRQ      | EIYGN  | ----- | RYVEK  |
| Oryza sativa_7                 | --KA   | S | LE  | DGAKE  | -----           | TDIATRQ      | MLYGN  | ----- | RHAEK  |
| Selaginella moellendorffii_8   | --LV   | S | LD  | DGVSK  | -----           | DEIDKRR      | EAFGS  | ----- | MYEEK  |
| Selaginella moellendorffii_9   | --HVH  | G | IE  | HGIDP  | -----           | SELDARR      | RAFGS  | ----- | TYKES  |
| Oryza sativa_8                 | --AS   | G | AE  | RGIRG  | DD              | ADVARRK      | KAFGS  | ----- | TYPKP  |
| Fragilariopsis cylindrus_13    | --AT   | H | PD  | HGAAE  | -----           | TSINKRR      | ELFGS  | ----- | LLPSS  |
| Pseudo-nitzschia multiseriis_4 | --AT   | N | RD  | HGAAE  | -----           | STIETRR      | ETFGS  | ----- | VLPST  |
| Phaeodactylum tricorutum_4     | --GT   | D | PK  | AGLDR  | -----           | ETIETRR      | ACFGN  | ----- | RLPSA  |
| Thalassiosira pseudonana_6     | --RS   | K | PE  | DGITN  | EQ              | SDIEFRR      | EAFGN  | ----- | AIADK  |
| Phaeodactylum tricorutum_5     | --RS   | S | PE  | VGIFP  | -----           | SEVEKRR      | EAFGS  | ----- | RIAPK  |
| Phaeodactylum tricorutum_6     | --RS   | S | PE  | SGIDP  | -----           | REVEHRQ      | SVFGS  | ----- | AIAAK  |



|                                |    |                                     |        |    |
|--------------------------------|----|-------------------------------------|--------|----|
| Fragilariopsis_cylindrus_11    | EK | EGLLKKIWNQVNNILVLILVIVAVISVVTA      | FVIPS  | AV |
| Fragilariopsis_cylindrus_12    | EK | EGLLKKIWNQVNNILVLILVIVAVISVVTA      | FVIPS  | AV |
| Pseudo-nitzschia_multiseriis_3 | EK | ETLLQKIWNQVNNILVLILVIVAVISLISA      | FVIPPE | DI |
| Phaeodactylum_tricornutum_3    | EK | VTLLQRVWKQVNNVVGILVVFVAVVSLAKG      | IST    | SG |
| Micromonas_pusilla_3           | PR | VSLLVLFLLIQNSVIMYLLMGAVVASAAIKATG   |        | DD |
| Micromonas_sp_3                | PR | VSLLVLFLLIQNSVIMYLLMAAVVASAAIKATG   |        | DD |
| Chlamydomonas_reinhardtii_5    | PP | PNFFMMLLEAAKDPMIIILLVIVAVITIVLGAA   | VP     | E  |
| Chlamydomonas_reinhardtii_6    | PP | PSFLSMLLEAAKDPMIVILLVIVAVITIVLGAA   | VP     | E  |
| Volvox_carteri_3               | PP | PSFLSMLLEASKDPMIIILLVVALVITIVLGAA   | VP     | E  |
| Volvox_carteri_4               | PP | PSFLSMLLEASKDPMIIILLVVALVITIVLGAA   | VP     | E  |
| Volvox_carteri_5               | PP | KNFFVLVWEVVDPIILLIIIAAAVSTILGSA     | IP     | E  |
| Chlamydomonas_reinhardtii_7    | PP | KNFFVLVWEVVDPIILLIIIAAATVSTVLGAA    | IP     | E  |
| Chlamydomonas_reinhardtii_8    | PP | KSFFSLVWENLQDPVIIILCVAAAVSTALGAA    | IP     | E  |
| Volvox_carteri_6               | PP | KSFLALVWGNLQDPVIIILIIAALVSTILGAA    | IA     | E  |
| Ostreococcus_lucimarinus_3     | PP | KSFWEICKDALGDLTVRIILIAASVVS LAVGAG  | MK     | S  |
| Micromonas_sp_4                | PP | KSFLLQCRDALDDLTVOILCVAIIISLGIGAG    | LP     | K  |
| Selaginella_moellendorffii_5   | SP | KGFLAFLWEACODLTLVILGVCAVVS LALA     | LA     | T  |
| A.thaliana_AT3G21180.1         | KG | KNFFMFLWEAWODLTLIILIIAAVTS LALG     | IK     | T  |
| Aquilegia_caerulea_5           | KG | RSFLNPLWEAWODLTLIILMVAAAAS LALG     | IK     | T  |
| A.thaliana_AT5G57110.2         | KG | KGFLRFLWDACHDLTLIILMVAAVAS LALG     | IK     | T  |
| Oryza_sativa_3                 | KG | RSFLAFLWDACKDLTLIILMVAAAVS LALG     | IT     | T  |
| Zea_mays_2                     | KG | RSFLAFVWDACKDLTLIILMVAAAVS LALG     | IT     | T  |
| Zea_mays_3                     | ER | RSIWHFVFEACODLTLVILMVAAAI SFSLG     | MA     | T  |
| Zea_mays_4                     | KR | KNILRFVFEACODLTLVILMIAAAI SLTLG     | MT     | T  |
| Selaginella_moellendorffii_6   | AG | KSFV                                |        |    |
| Selaginella_moellendorffii_7   | KR | IPFYMYVWEALQDETLMLILCAIVS LAVG      | LT     | T  |
| Aquilegia_caerulea_6           | EV | RSFWVFVWEALQDMTLMILGVCAFVSLIVG      | LI     | M  |
| Medicago_truncatula_3          | QA | KSFVWFVWEALQDMTLMILGVCAVSLIVG       | IA     | T  |
| A.thaliana_AT2G22950.1         | EL | RSFWVFVWEALQDMTLMILGVCAFVSLIVG      | IA     | T  |
| A.thaliana_AT4G37640.1         | EM | RGFWVFVWEALQDMTLMILGVCAFVSLIVG      | IA     | T  |
| Oryza_sativa_4                 | ES | RSFWVFVWEALQDMTLMILAACAFFSLVVG      | IA     | T  |
| Zea_mays_5                     | EP | RSFWVFVWEALQDMTLMILAACALVSLVVG      | IA     | T  |
| Oryza_sativa_5                 | EV | RSFWVFVWEALQDTLLIILAVCAFVSLVVG      | IA     | M  |
| A.thaliana_AT1G27770.1         | PS | RGFWLFVWEALQDTLLMILAACAFVSLIVG      | IL     | M  |
| Oryza_sativa_6                 | EI | RSFWEFVWEALEDTLLIILSACAFVSLVVG      | IT     | T  |
| Zea_mays_6                     | EA | RSLWEFVWEALQDTLLVILIIACALVSVVVG     | IA     | T  |
| Aquilegia_caerulea_7           | PS | KGFFMFVWEALQDLTLMILMVCAVVSIGVVG     | LA     | T  |
| Oryza_sativa_7                 | PP | RSFWMFVWDALHDLTLIILVVCAVSVVVG       | LA     | T  |
| Selaginella_moellendorffii_8   | PP | KGFWVFVWEAMHDLTLAILGFCAILSLVIG      | VL     | T  |
| Selaginella_moellendorffii_9   | PQ | RSVFSYILDASQDLTLLIILVVCAVSVVVG      | IA     | T  |
| Oryza_sativa_8                 | KP | KGFFRHVWDALADVFLIVLLVCAAVSLAFG      | IK     | E  |
| Fragilariopsis_cylindrus_13    | PR | KSFYQLFIDTFDDATLQILIVAAIVSLCVG      | MY     |    |
| Pseudo-nitzschia_multiseriis_4 | PR | QSFVQLFVDTFDDATLQILIVAAIVSLAIG      | IY     |    |
| Phaeodactylum_tricornutum_4    | PR | KTFGQLFLDTFDDATLQILIVAAIVSLAVG      | LY     |    |
| Thalassiosira_pseudonana_6     | KL | DSFLKLCWNAVDFVLIMLIVLGVIGIVVETTIGLD |        | PG |
| Phaeodactylum_tricornutum_5    | KI | ESFCKLCWHAIQDFVLVMLIVLGVISIGVEIYS   | LE     | ND |
| Phaeodactylum_tricornutum_6    | SI | DSFFRLCWEAVDFVLIMLIVLGVISIVIEVGT    | LE     | DG |

Skeletonema\_marinoi\_ABC AKNILSGKT-ESKELNDFGIKDLLLEALVEPIVITTTILVINALVGGYQSLNASKGISALKEMOASKA--VVRVC-RGG--NDVDEVELDASSLVPDGVRR  
 Thalassiosira\_pseudonana\_1 -----ALVEPIVITTTILVINALVGGYQSLNASKGISALKEMOASKA-----SAIDEVEVDASSLVPDGVVI  
 Thalassiosira\_oceanica\_1 ATTIVTGHSGDDTKLHKIGIKKHVIEALVEPIVITTTILVINALVGGYQSLDASKGISALKSQADKA--VIRVS-SGDR--STFDEVEVDSSSLVPGDITV  
 Phaeodactylum\_tricornutum\_1 EA-----LWKSFVEPLVILAILLVNAAVGVVQSQSASDSLALQRMQSATA--TVLR-----DGVVWSSLEASDLVPGDIE  
 Fragilariopsis\_cylindrus\_1 SS-----IWHRFAPVVISSLLIINAVGVVQSKSASGSEALKAMQPNIC--TVIRN-----NGTEYNDYPSCDLVVGDIII  
 Fragilariopsis\_cylindrus\_2 SS-----IWHRFAPVVISSLLIINAVGVVQSKSASGSEALKAMQPNIC--TVIRN-----NGTEYNDYPSCDLVVGDIII  
 Fragilariopsis\_cylindrus\_3 SS-----IWHRFAPVVISSLLIINAVGVVQSKSASGSEALKAMQPNIC--TVIRN-----NGTEYNDYPSCDLVVGDIII  
 Fragilariopsis\_cylindrus\_4 SS-----IWHRFAPVVISSLLIINAVGVVQSKSASGSEALKAMQPNIC--TVIRN-----NGTEYNDYPSCDLVVGDIII  
 Fragilariopsis\_cylindrus\_5 SS-----IWHRFAPVVISSLLIINAVGVVQSKSASGSEALKAMQPNIC--TVIRN-----NGTEYNDYPSCDLVVGDIII  
 Fragilariopsis\_cylindrus\_6 SS-----IWHRFAPVVISSLLIINAVGVVQSKSASGSEALKAMQPNIC--TVIRN-----NGTEYNDYPSCDLVVGDIII  
 Fragilariopsis\_cylindrus\_7 SS-----IWHRFAPVVISSLLIINAVGVVQSKSASGSEALKAMQPNIC--TVIRN-----NGTEYNDYPSCDLVVGDIII  
 Fragilariopsis\_cylindrus\_8 SS-----IWHRFAPVVISSLLIINAVGVVQSKSASGSEALKAMQPNIC--TVIRN-----NGTEYNDYPSCDLVVGDIII  
 Pseudo-nitzschia\_multiseriata\_1 ES-----LWHRFAEPIVSSLLVINASVGVVQSKSAGNSIEALKAMQPSVC-----TAEIADYPSADLVPGDLIV  
 Thalassiosira\_pseudonana\_2 ST-----IQSFVEPFIIVAILLLNACVGVVQDLARSSELEALKKMPRKA--TVLRYDEDTNNNYSDWITDYDATQLVPGDIIR  
 Ostreococcus\_lucimarinus\_1 EE-----GLAAYAEPVAVIALILVNAIVGVVQESNAERALDALKEMOSEHA--KCLR-----DGRWNGSLEARELVPGDVVE  
 Zea\_mays\_1 EV-----GLTAFVEPLVIFLILIVNAVGVVQESNAEKALEALKEIQSEHA--TVRR-----DGRWSHGLPARDLVPGDIVE  
 Oryza\_sativa\_1 EV-----GATAFVEPLVIFLILIVNAVGVVQESNAEKALEALKEIQSEHA--TVKR-----DGRWSHGLPARDLVPGDIVE  
 Aquilegia\_caerulea\_1 EM-----GITAFVEPLVIFLILIVNAVGVVQETNAEKALEALKEIQSEHA--NVIR-----NGKRIPLPAKELVPGDIVE  
 A.thaliana\_AT1G07810.1 EM-----GITAFVEPLVIFLILIVNAVGIWQETNAEKALEALKEIQSOQA--TVMR-----DGTKVSSLPKELVPGDIVE  
 A.thaliana\_AT1G07670.1 EM-----GITAFVEPLVIFLILIVNAVGIWQETNAEKALEALKEIQSOQA--TVMR-----DGTKVSSLPKELVPGDIVE  
 Medicago\_truncatula\_1 EM-----EITAFVEPLVIFLILIVNAVGVVQESNAEKALEALKEIQSEQA--SVIR-----NNEKIPSLPAKDLVPGDIVE  
 Glycine\_max\_1 EM-----EITAFVEPLVIFLILIVNAVGVVQESNAEKALDALKEIQSEHA--VVIR-----EGAKIPNLPAKELVPGDIVE  
 Glycine\_max\_2 EM-----EITAFVEPLVIFLILIVNAVGVVQESNAEKALDALKEIQSEHA--VVIR-----EGAKIPNLPAKELVPGDIVE  
 Aquilegia\_caerulea\_2 EM-----GITAFVEPLVIFLILIVNAVGVVQESNAEKALEALKEIQSEHA--TVIR-----EGKIHNLPAKELVPGDIVE  
 Selaginella\_moellendorffii\_1 ES-----DLTAYVEPLVIFLILIVNAVGVVQETNAESALEALKEMOSEHA--KCLR-----DGHWIPDLAARELVPGDVVE  
 Physcomitella\_patens\_1 TS-----GIGAYVEPLVIFLILILNAVGVVQESNAENALEALKEMOSEHA--KVFR-----DGKISDLPAELVPGDIVE  
 Physcomitella\_patens\_2 ES-----GIGAYVEPLVIFLILILNAVGVVQESNAERALEALEEMOSEHA--KVIR-----DGEFISNLPAELVPGDIVE  
 Physcomitella\_patens\_3 EE-----GATAYVEPMVIMLILNAVGVVQESNAENALEALKEMOSEQA--EVIR-----DGVVSSLPKELVPGDIVE  
 Selaginella\_moellendorffii\_2 ES-----ELTAYVEPLVIMLILNAVGVVQESNAERALEALKEMOSEHA--KCLR-----DGLLGLDLPARELVPGDVVE  
 Glycine\_max\_3 ES-----GFEAYVEPLVILILVNAIVGVVQENNAEKALEALKEIQSESG--KCLR-----DGYFVPLPAKELVPGDIVE  
 Glycine\_max\_4 ES-----GFEAYVEPLVILILVNAIVGVVQENNAEKALEALKEIQSESA--KCLR-----DGYFVPLPAKELVPGDIVE  
 Aquilegia\_caerulea\_3 EA-----GFEAYVEPFVIVLILVNAIVGVVQETNAEKALEALKEIQSESA--KCLR-----DGNVPLNLPARELVPGDIVE  
 A.thaliana\_AT4G00900.1 GS-----GFEAFVEPFVIVLILILNAVGVVQESNAEKALEALKEMOSESA--KCLR-----DGNVPLNLPARELVPGDIVE  
 Chlamydomonas\_reinhardtii\_1 EE-----GLRAFIEPLVILLILILNAVGVVQESNAESALEALKEIQSEHA--HVTR-----NGKMSDLPSRELLVPGDIVH  
 Volvox\_carteri\_1 EE-----GIRAFIEPLVILLILILNAVGVVQESNAESALEALKEIQSEHA--HVTR-----NGKMSDLPAELVPGDVVH  
 Micromonas\_pusilla\_1 PI-----DLVDFVEPGVILLILILNAVGVVQESNAENALEALKEMOSEDTA--RVLR-----DGKWDHAFQARDLVPGDVVE  
 Micromonas\_sp\_1 EL-----SLVDFVEPGVILLILILVNAIVGVVQESNAESALEALKEMOSEHA--RCLR-----AGEWISDLPAELVPGDVVE  
 Selaginella\_moellendorffii\_3 KL-----GPGAFTEPLVILSIIILNAVGVVQESKAESTLQALKEMOSEHA--RVLR-----DGKEIVDLPAELVPGDIVE  
 Thalassiosira\_oceanica\_2 EE-----GILAYIEPIVILVILVNAIVGVVQENNAEAALKEALKEIQSEHA--RVLR-----DGKMGTVCSRELVPDIVE  
 Thalassiosira\_pseudonana\_3 EE-----GILAYIEPIVILILILNAVGVVQESNAEAALKEALKEIQSEHA--RVLR-----DGKMATINSREIVPGDIE  
 Pseudo-nitzschia\_multiseriata\_2 DH-----WVEAFVEPAVILLILILNAVGVVQESNAENALEALKMQSLHA--PCLR-----DGVVHDALPTEELVPGDIVK  
 Fragilariopsis\_cylindrus\_9 GH-----WIEAFVEPAVILLILILNAVGVVQESNAENALEALKMQSLHT--PCLR-----GGIWDQLPTEELVPGDIVK  
 Fragilariopsis\_cylindrus\_10 GH-----WIEAFVEPAVILLILILNAVGVVQESNAENALEALKMQSLHT--PCLR-----GGIWDQLPTEELVPGDIVK  
 Aquilegia\_caerulea\_4 ET-----GLTAFLEPFVILLILAANAAGVITETNAEKALEELRAYQADVA--TVLR-----NGC-FSILPATLVPDIVE  
 Glycine\_max\_5 ET-----GLMAFLEPVSILMILAANAAGVITETNAEKALEELRAYQADVA--TVLR-----NGC-FSILPATLVPDIVE  
 Medicago\_truncatula\_2 ET-----GLMAFLEPVSILMILAANAAGVITETNAEKALEELRAYQADVA--TVLR-----NGC-FSILPATLVPDIVE  
 A.thaliana\_AT1G10130.1 ET-----GLTAFLEPFVILLILAANAAGVITETNAEKALEELRAYQANIA--TVLR-----NGC-FSILPATLVPDIVE  
 Oryza\_sativa\_2 ET-----GLAAFLEPVSIFLILAANAAGVITETNAEKALEELRAYQADVA--TVLR-----NGC-FSILPATLVPDIVE  
 Selaginella\_moellendorffii\_4 ET-----GPTAFVEPFVILLILAANAAGVITETNAEKALKEELKAYQADVA--TVLR-----NGI-LSIVPASNLVPGDIVE  
 Micromonas\_pusilla\_2 D-----GSGAFVEPGVIVLILVANATVGVVTERNAERALEELKAYQANLA--TVLR-----SGR-LKVLPAELVPGDVVE  
 Micromonas\_sp\_2 E-----GIYSLIEPVSIVACILIANAVGVVMTETNAERALEELKAYQADVA--TVCR-----GGS-LTVCPAAELVPGDIVE  
 Volvox\_carteri\_2 EG-----VLGALVEPFVIVLILVANATVGVVTERNAEQALEELKAYEESA--TVLR-----SGV-LQLVPSGDLVPGDVVE  
 Chlamydomonas\_reinhardtii\_2 EG-----VLGSLVEPFVILILIANATVGVVTERNAEQALEELKAYEESA--TVLR-----NGV-LQLVPGADLVPGDVVE  
 Dunaliella\_salina\_1 ES-----IQSGLIEPMVILLILVANATVGVVTERNAEKALEELKYSYE-----  
 Ostreococcus\_lucimarinus\_2 EG-----GSEAFLEPGVIVAILIANAAGVATEKNAERALEELKYEADVA--TCTR-----DGE-KRKVNAAELVPGDIVE  
 Phaeodactylum\_tricornutum\_2 -----NOSEAISIAFALLIVSMVAAVQEYRSEAALEKATLAVPHTC--TVLR-----DGOVIDGFFAKELVGDIVL  
 Chlamydomonas\_reinhardtii\_3 -----AESWAEFGLIIGVIVINTALGLYQEGRAEKAAADAIKALLSPNA--TVLR-----DGO-AAVLPAESLVPDIVL  
 Chlamydomonas\_reinhardtii\_4 -----AESWAEFGLIIGVIVINTALGLYQEGRAEKAAADAIKALLSPNA--TVLR-----DGO-AAVLPAESLVPDIVL  
 Thalassiosira\_pseudonana\_4 NT-----RFTAWFQVALIVSVITLNTWIGIYQEGNAEKAAADALKNMLSTDA--RVIR-----GGK-EVMIPAGDIVPGDVCL  
 Thalassiosira\_pseudonana\_5 -----FTAWFQVALIVSVITLNTWIGIYQEGNAEKAAADALKNMLSTDA--RVIR-----SGK-EIMISAGEIVPGDVCL

|                                 |    |       |                                                   |      |       |     |                   |
|---------------------------------|----|-------|---------------------------------------------------|------|-------|-----|-------------------|
| Fragilariopsis_cylindrus_11     | NP | ----- | TYTNWIQVAIIVGVIVANTVIGIVQEGSAENAAEALKNMLSSDA      | VLVR | ----- | DGV | ETKVP SQFIVPGDVVV |
| Fragilariopsis_cylindrus_12     | NP | ----- | TYTNWIQVAIIVGVIVANTVIGIVQEGSAENAAEALKNMLSSDA      | VLVR | ----- | DGV | ETKVP SQFIVPGDVVV |
| Pseudo-nitzschia_multiseriata_3 | NP | ----- | RYTNFIQIGIILGVIVINTIIGLIQEGSAEAAEALKNMLSSDA       | IVIR | ----- | DGV | TTKVP AQLLVPGDAVI |
| Phaeodactylum_tricornutum_3     | ED | ----- | RVTNFIQIGIILGVIVINTIIGLIQEGSAEAAEALKNMLSSDA       | ILIR | ----- | DGK | EVKIPASDVVPGDVVV  |
| Micromonas_pusilla_3            | KD | ----- | QFLSYIDSIATIIIVFINASIAAKAENNALEALSSLOQAPIS        | TLIR | ----- | DGE | EIRVESSDIVRGDLVK  |
| Micromonas_sp_3                 | KD | ----- | KFLSYVDSIAISIIILINATIAAVTENSANDALEALSSLOSPMC      | TVIR | ----- | GGE | EVSIESKNMVRGDIVK  |
| Chlamydomonas_reinhardtii_5     | QR | ----- | AHQGWSEGLAVLGTALIVIFLIGAGQDFSKERQFQKLNALKDNIDV    | KVTR | ----- | GK  | QVLVPNTEVVVGDIMF  |
| Chlamydomonas_reinhardtii_6     | QR | ----- | AHQGWSEGLAVLGTALIVVFIGAGQDYSKERQFQKLNALKDNIEV     | KVTR | ----- | GK  | QVLVPNTEVVVGDIMF  |
| Volvox_carteri_3                | QR | ----- | AHDGWSSEGLAVLGTALIVIFLIGAGQDYSKERQFQKLNALKDNIDV   | KVTR | ----- | SGR | QVLVPNTEVVVGDILF  |
| Volvox_carteri_4                | QR | ----- | AHDGWSSEGLAVLGTALIVIFLIGAGQDYSKERQFQKLNALKDNIDV   | KVTR | ----- | SGR | QVLVPNTEVVVGDILF  |
| Volvox_carteri_5                | ER | ----- | KKNHWIEGVAVIIVVAVIVVTLVGAGNDYSKDLQFRKLNALKDNIDV   | KVTR | ----- | GGE | QILVNTDLVVGDIVI   |
| Chlamydomonas_reinhardtii_7     | ER | ----- | AKSAWVEGVAVIIVVAVIVVTLVGAGNDYSKDLQFRKLNALKDNIEI   | KVTR | ----- | GGE | QILVNTDLVVGDIVI   |
| Chlamydomonas_reinhardtii_8     | QR | ----- | KHGEWIEGVAVIIVVAVIVVTLVGAGNDYSKDLQFRKLNALKDNIMV   | KVTR | ----- | GGE | QILVNTDLVVGDIVI   |
| Volvox_carteri_6                | QR | ----- | KHGEWIEGVAVIIVVAVIVVTLVGAGNDYSKDLQFRKLNALKDNIMV   | KVTR | ----- | GGE | QILVNTDLVVGDIVI   |
| Ostreococcus_lucimarinus_3      | HR | ----- | EEYGYLEGIAIVLVVVFVVFVLFQAFIDYAKEMKFRQLNSVKNYQV    | KVHR | ----- | DGK | SVAVPAGEIMVGDIVE  |
| Micromonas_sp_4                 | HR | ----- | EEYGYLEGIAIVLVVVFVVFVLFQAFIDYAKEMKFRQLNSVKNYQV    | KVHR | ----- | DGK | SVAVPAGEIMVGDIVE  |
| Selaginella_moellendorffii_5    | KV | ----- | KFASWYDGLIAFVAVLVVVFVVFVLFQAFIDYAKEMKFRQLNSVKNYQV | KVHR | ----- | DGK | SVAVPAGEIMVGDIVE  |
| A.thaliana_AT3G21180.1          | EG | ----- | LKEGWLDGGSIAFAVLLVIVVTAIVSDYRQSLQFQNLNDEKRNIOI    | EVMR | ----- | GGR | TVKISIVYDVVGDVIP  |
| Aquilegia_caerulea_5            | EG | ----- | LKEGWLDGGSIAFAVLLVIVVTAIVSDYRQSLQFQNLNDEKRNIOI    | EVMR | ----- | GGR | TVKISIVYDVVGDVIP  |
| A.thaliana_AT5G57110.2          | EG | ----- | LKEGWLDGGSIAFAVLLVIVVTAIVSDYRQSLQFQNLNDEKRNIOI    | EVMR | ----- | GGR | TVKISIVYDVVGDVIP  |
| Oryza_sativa_3                  | EG | ----- | LKEGWLDGGSIAFAVLLVIVVTAIVSDYRQSLQFQNLNDEKRNIOI    | EVMR | ----- | GGR | TVKISIVYDVVGDVIP  |
| Zea_mays_2                      | EG | ----- | LKEGWLDGGSIAFAVLLVIVVTAIVSDYRQSLQFQNLNDEKRNIOI    | EVMR | ----- | GGR | TVKISIVYDVVGDVIP  |
| Zea_mays_3                      | EG | ----- | LKEGWLDGGSIAFAVLLVIVVTAIVSDYRQSLQFQNLNDEKRNIOI    | EVMR | ----- | GGR | TVKISIVYDVVGDVIP  |
| Zea_mays_4                      | EG | ----- | LKEGWLDGGSIAFAVLLVIVVTAIVSDYRQSLQFQNLNDEKRNIOI    | EVMR | ----- | GGR | TVKISIVYDVVGDVIP  |
| Selaginella_moellendorffii_6    | EA | ----- | RWYDGGGICFAIVVCMVAVSLSDYNQANQFQKLSAEKRKIYI        | NVTR | ----- | GGE | RTKVSIFELVVGDMVH  |
| Selaginella_moellendorffii_7    | EA | ----- | RWYDGGGICFAIVVCMVAVSLSDYNQANQFQKLSAEKRKIYI        | NVTR | ----- | GGE | RTKVSIFELVVGDMVH  |
| Aquilegia_caerulea_6            | EG | ----- | WPKGAHDGLGIAASILLVVFVTAIVSDYRQSLQFQNLNDEKRNIOI    | EVMR | ----- | GGR | TVKISIVYDVVGDVIP  |
| Medicago_truncatula_3           | EG | ----- | WPKGAHDGLGIAASILLVVFVTAIVSDYRQSLQFQNLNDEKRNIOI    | EVMR | ----- | GGR | TVKISIVYDVVGDVIP  |
| A.thaliana_AT2G22950.1          | EG | ----- | WPKGAHDGLGIAASILLVVFVTAIVSDYRQSLQFQNLNDEKRNIOI    | EVMR | ----- | GGR | TVKISIVYDVVGDVIP  |
| A.thaliana_AT4G37640.1          | EG | ----- | WPKGAHDGLGIAASILLVVFVTAIVSDYRQSLQFQNLNDEKRNIOI    | EVMR | ----- | GGR | TVKISIVYDVVGDVIP  |
| Oryza_sativa_4                  | EG | ----- | WPKGAHDGLGIAASILLVVFVTAIVSDYRQSLQFQNLNDEKRNIOI    | EVMR | ----- | GGR | TVKISIVYDVVGDVIP  |
| Zea_mays_5                      | EG | ----- | WPKGAHDGLGIAASILLVVFVTAIVSDYRQSLQFQNLNDEKRNIOI    | EVMR | ----- | GGR | TVKISIVYDVVGDVIP  |
| Oryza_sativa_5                  | EG | ----- | WPKGAHDGLGIAASILLVVFVTAIVSDYRQSLQFQNLNDEKRNIOI    | EVMR | ----- | GGR | TVKISIVYDVVGDVIP  |
| A.thaliana_AT1G27770.1          | EG | ----- | WPKGAHDGLGIAASILLVVFVTAIVSDYRQSLQFQNLNDEKRNIOI    | EVMR | ----- | GGR | TVKISIVYDVVGDVIP  |
| Oryza_sativa_6                  | EG | ----- | WPKGAHDGLGIAASILLVVFVTAIVSDYRQSLQFQNLNDEKRNIOI    | EVMR | ----- | GGR | TVKISIVYDVVGDVIP  |
| Zea_mays_6                      | EG | ----- | WPKGAHDGLGIAASILLVVFVTAIVSDYRQSLQFQNLNDEKRNIOI    | EVMR | ----- | GGR | TVKISIVYDVVGDVIP  |
| Aquilegia_caerulea_7            | EG | ----- | WPKGAHDGLGIAASILLVVFVTAIVSDYRQSLQFQNLNDEKRNIOI    | EVMR | ----- | GGR | TVKISIVYDVVGDVIP  |
| Oryza_sativa_7                  | EG | ----- | WPKGAHDGLGIAASILLVVFVTAIVSDYRQSLQFQNLNDEKRNIOI    | EVMR | ----- | GGR | TVKISIVYDVVGDVIP  |
| Selaginella_moellendorffii_8    | EG | ----- | WPKGAHDGLGIAASILLVVFVTAIVSDYRQSLQFQNLNDEKRNIOI    | EVMR | ----- | GGR | TVKISIVYDVVGDVIP  |
| Selaginella_moellendorffii_9    | EG | ----- | WPKGAHDGLGIAASILLVVFVTAIVSDYRQSLQFQNLNDEKRNIOI    | EVMR | ----- | GGR | TVKISIVYDVVGDVIP  |
| Oryza_sativa_8                  | EG | ----- | WPKGAHDGLGIAASILLVVFVTAIVSDYRQSLQFQNLNDEKRNIOI    | EVMR | ----- | GGR | TVKISIVYDVVGDVIP  |
| Fragilariopsis_cylindrus_13     | DD | ----- | PAAGYVEGMAILSACLIVSVVVTALNDYQKETQFRELVAANDEIDV    | LVIR | ----- | SGK | FQKIPVGGELVVGDLVS |
| Pseudo-nitzschia_multiseriata_4 | DD | ----- | PEVGYVEGMAILSACLIVSVVVTALNDYQKETQFRELVAANDEIDV    | LVIR | ----- | SGK | FQKIPVGGELVVGDLVS |
| Phaeodactylum_tricornutum_4     | DD | ----- | PATGYVEGMAILSACLIVSVVVTALNDYQKETQFRELVAANDEIDV    | LVIR | ----- | SGK | FQKIPVGGELVVGDLVS |
| Thalassiosira_pseudonana_6      | EK | ----- | CGMCWLEGAAILASVCIVVLTAVNDYQKETQFRELVAANDEIDV      | LVIR | ----- | NNV | HWQIPVGGELVVGDLVS |
| Phaeodactylum_tricornutum_5     | EE | ----- | CTTCWIEGAAILASVCIVVLTAVNDYQKETQFRELVAANDEIDV      | LVIR | ----- | NNV | HWQIPVGGELVVGDLVS |
| Phaeodactylum_tricornutum_6     | ED | ----- | CKTCWIEGAAILASVCIVVLTAVNDYQKETQFRELVAANDEIDV      | LVIR | ----- | NNV | HWQIPVGGELVVGDLVS |

|                                 |       |               |        |     |              |             |       |          |          |    |   |   |                   |          |
|---------------------------------|-------|---------------|--------|-----|--------------|-------------|-------|----------|----------|----|---|---|-------------------|----------|
| Skeletonema_marinoi_ABC         | LSVGG | -KIPADIRLVSV  | ST     | -SS | FTVDEACTLGS  | SDSVNKIPYK  | -     | GD       | TKNDDMO  | NG | - | - | GGTMGANSNGMLYG    | -        |
| Thalassiosira_pseudonana_1      | LTVGG | -KIPADIRLMSV  | ST     | -ST | FTVDEACTLGS  | SDSVKIPYK   | -     | GD       | VQNDDEEH | -  | - | - | NGHHANGMLYG       | -        |
| Thalassiosira_oceanica_1        | LSIGE | -KVPADIRLVSV  | ST     | -ST | FTVDEACTLGS  | SDSVAKTIPYK | -     | GD       | PAKDPAP  | EG | - | - | GSGSGEFASGMLYG    | -        |
| Phaeodactylum_tricornutum_1     | LRVGD | -KIPADSRLLSL  | QS     | -SS | LQIDEGSLTGS  | SVTVGKLP    | -     | -        | GDEG     | RA | - | - | DSPNRPVQDKGMLYS   | -        |
| Fragilariopsis_cylindrus_1      | LKTGD | -KIPADARLVSY  | YKGRRT | -   | LMVDEASLTGS  | SISVEKLICD  | NNNDG | TTTOSKEE | SN       | -  | - | - | NSISNHQFNDGMCYS   | -        |
| Fragilariopsis_cylindrus_2      | LKTGD | -KIPADARLVSY  | YKGRRT | -   | LMVDEASLTGS  | SISVEKLICD  | NNNDG | TTTOSKEE | SN       | -  | - | - | NSISNHQFNDGMCYS   | -        |
| Fragilariopsis_cylindrus_3      | LKTGD | -KIPADARLVSY  | YKGRRT | -   | LMVDEASLTGS  | SISVEKLICD  | NNNDG | TTTOSKEE | SN       | -  | - | - | NSISNHQFNDGMCYS   | -        |
| Fragilariopsis_cylindrus_4      | LKTGD | -KIPADARLVSY  | YKGRRT | -   | LMVDEASLTGS  | SISVEKLICD  | NNNDG | TTTOSKEE | SN       | -  | - | - | NSISNHQFNDGMCYS   | -        |
| Fragilariopsis_cylindrus_5      | LKTGD | -KIPADARLVSY  | YKGRRT | -   | LMVDEASLTGS  | SISVEKLICD  | NNNDG | TTTOSKEE | SN       | -  | - | - | NSISNHQFNDGMCYS   | -        |
| Fragilariopsis_cylindrus_6      | LKTGD | -KIPADARLVSY  | YKGRRT | -   | LMVDEASLTGS  | SISVEKLICD  | NNNDG | TTTOSKEE | SN       | -  | - | - | NSISNHQFNDGMCYS   | -        |
| Fragilariopsis_cylindrus_7      | LKTGD | -KIPADARLVSY  | YKGRRT | -   | LMVDEASLTGS  | SISVEKLICD  | NNNDG | TTTOSKEE | SN       | -  | - | - | NSISNHQFNDGMCYS   | -        |
| Fragilariopsis_cylindrus_8      | LKTGD | -KIPADARLVSY  | YKGRRT | -   | LMVDEASLTGS  | SISVEKLICD  | NNNDG | TTTOSKEE | SN       | -  | - | - | NSISNHQFNDGMCYS   | -        |
| Pseudo-nitzschia_multiseriata_1 | LKTGD | -KIPADCRVRY   | YQGRRS | -   | LAVDETCLTGS  | IAVEKLL     | -     | GOEG     | LA       | -  | - | - | PSKAPVQSOSGMVFS   | -        |
| Thalassiosira_pseudonana_2      | LRVGE | -YIPADARLASL  | TS     | -ST | MYVDESSLTGS  | SVSVGKLP    | -     | GDEG     | LPAG     | -  | - | - | DDKKTIPIDQSSMLFS  | -        |
| Ostreococcus_lucimarinus_1      | LKTGD | -RVPADCRVIRL  | KT     | -AT | VRVEQASLTGS  | SVAVDK      | -     | RVES     | VK       | -  | - | - | DEDIELOGKTCMLFA   | -        |
| Zea_mays_1                      | LRVGD | -KVPADMRVLOL  | IS     | -ST | LRVEQGSLTGS  | TASVNK      | -     | TSHK     | IE       | -  | - | - | LEDTDIOGKECMVFA   | -        |
| Oryza_sativa_1                  | LRVGD | -KVPADMRVLOL  | IS     | -ST | LRVEQGSLTGS  | TASVNK      | -     | TSHK     | IE       | -  | - | - | LEDTDIOGKECMVFA   | -        |
| Aquilegia_caerulea_1            | LRVGD | -KIPADLRLLTL  | IT     | -ST | VRVEQSSLTGS  | EAVNK       | -     | TNKP     | VS       | -  | - | - | VDTDIQKRCMLFA     | -        |
| A.thaliana_AT1G07810.1          | LRVGD | -KVPADMRVVAL  | IS     | -ST | LRVEQGSLTGS  | EAVSK       | -     | TKH      | VD       | -  | - | - | E-NADIOGKCMVFA    | -        |
| A.thaliana_AT1G07670.1          | LRVGD | -KVPADMRVVAL  | IS     | -ST | LRVEQGSLTGS  | EAVSK       | -     | TKH      | VD       | -  | - | - | E-NADIOGKCMVFA    | -        |
| Medicago_truncatula_1           | LKVG  | -KVPADMRVVVL  | IS     | -ST | LRLEQGSLTGS  | EAVNK       | -     | TNKP     | VA       | -  | - | - | E-DADIOGKCKIVFA   | -        |
| Glycine_max_1                   | LKVG  | -KVPADMRVVVL  | IS     | -ST | LRLEQGSLTGS  | EAVNK       | -     | TNKR     | VD       | -  | - | - | E-DADIOGKRCMVFA   | -        |
| Glycine_max_2                   | LKVG  | -KVPADMRVVVL  | IS     | -ST | LRLEQGSLTGS  | EAVNK       | -     | TNKR     | VD       | -  | - | - | E-DADIOGKRCMVFA   | -        |
| Aquilegia_caerulea_2            | LRVGD | -KVPADMRVLSL  | IS     | -ST | LRLEQGSLTGS  | EAVNK       | -     | TNKA     | VA       | -  | - | - | VETDIOGKCMVFA     | -        |
| Selaginella_moellendorffii_1    | LRVGD | -KVPADMRIAVL  | RT     | -ST | LRVEQSSLTGS  | AAVVK       | -     | STQA     | VE       | -  | - | - | LADVELQAKECMVFS   | -        |
| Physcomitella_patens_1          | LRVGD | -KVPADMRIIVKL | KT     | -ST | VRVEQSSLTGS  | SMSVTK      | -     | TSYA     | VE       | -  | - | - | ENIELQGKECMVFA    | -        |
| Physcomitella_patens_2          | LRVGD | -KVPADMRIIVKL | KT     | -ST | VRVEQSSLTGS  | SMSVTK      | -     | TTNS     | VK       | -  | - | - | ENIELQGKECMVFA    | -        |
| Physcomitella_patens_3          | LRVGD | -KVPADMRIIVSL | KT     | -ST | VRVEQSSLTGS  | SMAVLK      | -     | SNQN     | VE       | -  | - | - | EELIQGKCMVFA      | -        |
| Selaginella_moellendorffii_2    | LRVGD | -KVPADMRIASL  | KT     | -ST | FRIEQSSLTGS  | SVPVIK      | -     | GLOA     | VE       | -  | - | - | SEDIQKDCMVFA      | -        |
| Glycine_max_3                   | LHVGD | -KVPADMRVAAL  | KT     | -ST | LRVEQSSLTGS  | EAMPVLK     | -     | GTNP     | VF       | -  | - | - | LDDCELOAKENMVFA   | -        |
| Glycine_max_4                   | LHVGD | -KVPADMRVAAL  | KT     | -SI | LRVEQSSLTGS  | EAMPVLK     | -     | GTNP     | VF       | -  | - | - | LDDCELOAKENMVFA   | -        |
| Aquilegia_caerulea_3            | LRVGD | -KVPADMRVAVL  | KT     | -SI | LRVEQSSLTGS  | EAMPVIK     | -     | STNP     | VF       | -  | - | - | MDDCELOAKENMVFA   | -        |
| A.thaliana_AT4G00900.1          | LNVGD | -KVPADMRVSSL  | KT     | -ST | LRVEQSSLTGS  | EAMPVLK     | -     | GANL     | VV       | -  | - | - | MDDCELOGKENMVFA   | -        |
| Chlamydomonas_reinhardtii_1     | LHVGD | -RVPADCRVVAL  | RT     | -AT | CRVEQASLTGS  | SVAVNK      | -     | GSDP     | VA       | -  | - | - | DPNCELOAKECMLFA   | -        |
| Volvox_carteri_1                | LHVGD | -KVPADCRMVAL  | KT     | -AT | VRAEQASLTGS  | SVAVNK      | -     | STDP     | VA       | -  | - | - | DPNCELOAKECMVFA   | -        |
| Micromonas_pusilla_1            | VRTGD | -RVPADARVVTL  | KT     | -AT | IRLEQASLTGS  | SVAVNK      | -     | DIDA     | ID       | -  | - | - | DPDAELOAKECMLFG   | -        |
| Micromonas_sp_1                 | VRTGD | -RVPADCRVIRL  | KT     | -AT | IRLEQASLTGS  | SVAVNK      | -     | TTEP     | VA       | -  | - | - | DAGCELOGKECVLFG   | -        |
| Selaginella_moellendorffii_3    | LRAGD | -KASADMVAVFL  | KS     | -GT | IRLQQAALTGS  | SQPVLK      | -     | QPDS     | ES       | -  | - | - | DEEVEIQGKDNMVFA   | -        |
| Thalassiosira_oceanica_2        | VKVG  | -RVPADTRVSEL  | RT     | -TS | LRIDQSALTGS  | SQSVAK      | -     | DPAAP    | NVK      | -  | - | - | DDELVVQAKTNMIFA   | -        |
| Thalassiosira_pseudonana_3      | VKVG  | -RVPADTRVTEL  | RT     | -TS | LRIDQSALTGS  | SQSVAK      | -     | FPEVP    | NVG      | -  | - | - | EDELVVQAKTNMIFA   | -        |
| Pseudo-nitzschia_multiseriata_2 | ISVGD | -RAPADVRICKL  | IT     | -AT | LRSDEGALTGS  | SETVLK      | -     | TSNA     | IA       | -  | - | - | S-GEKISDQKNMVFA   | -        |
| Fragilariopsis_cylindrus_9      | ISVGD | -RSPADCRVLSF  | IT     | -AT | LRADEGALTGS  | SETVLK      | -     | QLEP     | TSSN     | -  | - | - | SSNKSSISDQKNMVFA  | -        |
| Fragilariopsis_cylindrus_10     | ISVGD | -RSPADCRVLSF  | IT     | -AT | LRADEGALTGS  | SETVLK      | -     | QLEP     | TSSN     | -  | - | - | SSNKSSISDQKNMVFA  | -        |
| Aquilegia_caerulea_4            | VGVC  | -KVPADMRTVEM  | LG     | -NQ | LRVDQAILTGS  | ECSVAK      | -     | ELES     | TS       | -  | - | - | ATNAVFDKTNILFS    | -        |
| Glycine_max_5                   | VSVGC | -KIPADMRMIEM  | LS     | -NQ | VRVDQAILTGS  | SSSVEK      | -     | ELKT     | TT       | -  | - | - | TTNAVYQDKTNILFS   | -        |
| Medicago_truncatula_2           | VSVGC | -KIPADMRMIEM  | LS     | -NE | VRVDQAILTGS  | SSSVEK      | -     | ELKT     | TT       | -  | - | - | AANAVYQDKTNILFS   | -        |
| A.thaliana_AT1G10130.1          | VTVGD | -KIPADLRMIEM  | SS     | -NT | FRVDQAILTGS  | ECSVAK      | -     | DVDC     | TL       | -  | - | - | TTNAVYQDKKNILFS   | -        |
| Oryza_sativa_2                  | VGVC  | -KVPADMRMIEM  | LS     | -HQ | LRVDQAILTGS  | ECSVAK      | -     | ELES     | TS       | -  | - | - | TMNAVYQDKTNILFS   | SNITNRDN |
| Selaginella_moellendorffii_4    | VAVGC | -KVPADMRVIDM  | LS     | -SS | ALRVDQAILTGS | SSSVAK      | -     | ELEE     | NP       | -  | - | - | VINPVYQDKTILFS    | -        |
| Micromonas_pusilla_2            | CVVGN | -KVPADVRLVSI  | AS     | -ST | FRVDQSILTGS  | SGSVSK      | -     | ELTP     | CA       | -  | - | - | SAKAVVQDKTCMLYS   | -        |
| Micromonas_sp_2                 | LAVGD | -RIPADIRLSGI  | VG     | -ST | FRVDQAPLTS   | GESEVTK     | -     | TIEK     | IA       | -  | - | - | ATKAVLQDKTICAFS   | -        |
| Volvox_carteri_2                | VAVGA | -KVPADIRLTAL  | IG     | -SV | LRADQSILTGS  | ESHTVDK     | -     | QVRP     | VL       | -  | - | - | KDNPVYQDKTNMLFS   | -        |
| Chlamydomonas_reinhardtii_2     | VAVGA | -KVPADTRLAGL  | LG     | -NV | LRVDQSILTGS  | ESHVSK      | -     | QVRP     | VL       | -  | - | - | KDNPVYQDKTNMMFS   | -        |
| Dunaliella_salina_1             | -VLGN | -KVPADTRVAHV  | YT     | -SS | LKTDSLLTGS   | ESHAVEK     | -     | HTEV     | VH       | -  | - | - | NKQAVYQDKLNMLFS   | -        |
| Ostreococcus_lucimarinus_2      | IATGE | -KVPADCRVLKI  | HS     | -NV | LRCDAQLLTGS  | SGSVAK      | -     | TERA     | VE       | -  | - | - | HLGECVLQDKTCMVFS  | -        |
| Phaeodactylum_tricornutum_2     | LATGD | -RVPADCRVV    | DS     | -VE | LILDESSLTGS  | ENHPVAK     | -     | TGEG     | VVL      | -  | - | - | GASPLTQKKNVFA     | -        |
| Chlamydomonas_reinhardtii_3     | LKSGD | -KVPADVRLI    | SA     | -VN | LOVQEAMLTGS  | SVPVSK      | -     | VLHP     | -        | -  | - | - | APAQAGLDRKCMCF    | -        |
| Chlamydomonas_reinhardtii_4     | LKSGD | -KVPADVRLI    | SA     | -VN | LOVQEAMLTGS  | SVPVSK      | -     | VLHP     | -        | -  | - | - | APAQAGLDRKCMCF    | -        |
| Thalassiosira_pseudonana_4      | LGLGD | -KIPADLRLLI   | SV     | -SN | LATGEAALTGS  | SVPIDK      | -     | VRMS     | V        | -  | - | - | ANPDQVPLGDRKNMAYS | -        |
| Thalassiosira_pseudonana_5      | LGLGD | -KVPADMRLI    | SV     | -SN | LATGEAALTGS  | SVPIDK      | -     | VTDA     | IPCENG   | -  | - | - | MDPDQVPLGDRKNMAYS | -        |

|                                |          |           |     |    |           |            |  |        |        |          |             |   |
|--------------------------------|----------|-----------|-----|----|-----------|------------|--|--------|--------|----------|-------------|---|
| Fragilariopsis_cylindrus_11    | LALGD    | KIPCDLRVI | EV  | SN | MASAEAAAL | TGESVPIEK  |  | TPLP   | IELNEG | OLPKQVPL | GDRKNMCF    | S |
| Fragilariopsis_cylindrus_12    | LALGD    | KIPCDLRVI | EV  | SN | MASAEAAAL | TGESVPIEK  |  | TPLP   | IELNEG | OLPKQVPL | GDRKNMCF    | S |
| Pseudo-nitzschia_multiseriis_3 | LGLGD    | RIPADLRVI | EV  | SN | MASAEAAAL | TGESVPIEK  |  | TPQA   | IPLNEG | QLAKQVPL | GDRKNMCF    | S |
| Phaeodactylum_tricornutum_3    | LGTGD    | RVPGDIRML | EV  | NN | LACQEAAL  | TGESVPIEK  |  | VTDA   | IDCGSG | KPEOVPL  | GDRKNMCF    | S |
| Micromonas_pusilla_3           | LGTGD    | VVPADVRCI | TA  | ND | LRVNEMLLT | TGEPEDVAK  |  | STKVKP |        | RVPGHP   | PEKLTADNMAF | S |
| Micromonas_sp_3                | LGTGD    | VVPADCRCI | KA  | ND | FRVNEMLLT | TGEPEDVAK  |  | NTKIKK |        | RVPGQPEK | LTADNMAF    | S |
| Chlamydomonas_reinhardtii_5    | LDTGD    | KVIADGIVI | DS  | QG | LVLDEASLT | TGESDPIKK  |  | D      |        |          | PVSDPWVRS   | S |
| Chlamydomonas_reinhardtii_6    | LDTGD    | KVIADGVVI | DS  | QG | IVLDEASLT | TGESDPIKK  |  | D      |        |          | AVSDPWVRS   | S |
| Volvox_carteri_3               | LDTGD    | KVIADGIVI | DS  | QG | LVLDEASLT | TGESDPIKK  |  | D      |        |          | PLNDPWVRS   | S |
| Volvox_carteri_4               | LDTGD    | KVIADGIVI | DS  | QG | LVLDEASLT | TGESDPIKK  |  | D      |        |          | PLNDPWVRS   | S |
| Volvox_carteri_5               | LDTGD    | KVVADAIVI | DS  | QG | LTMDEASLT | TGESDPMKK  |  | N      |        |          | INEDPWVMS   | S |
| Chlamydomonas_reinhardtii_7    | LDTGD    | KVVADAIVI | DS  | QG | LTMDEASLT | TGESDPMKK  |  | N      |        |          | TTADPWVMS   | S |
| Chlamydomonas_reinhardtii_8    | LDTGD    | KVVADGVCF | DC  | QG | LVIDEASLT | TGESDPIKK  |  | N      |        |          | TDSDPWVRS   | S |
| Volvox_carteri_6               | LDTGD    | KVVADGICF | DS  | QG | LVVDEASLT | TGESDPIKK  |  | N      |        |          | PEDDCWVRS   | S |
| Ostreococcus_lucimarinus_3     | LAAGD    | KVPADALFV | EG  | SK | FKANEAAAM | TGEPIDISK  |  | S      |        |          | REKDPWVLS   | S |
| Micromonas_sp_4                | LSAGD    | KVPADGVFL | EG  | SK | LRADESAMT | TGEPIGIAK  |  | S      |        |          | HDKDPFLLS   | S |
| Selaginella_moellendorffii_5   | LKTGD    | QIPADGVLV | DG  | YS | LVVDESSLT | TGESDPVSM  |  | PK     |        |          | GLDHPFFMS   | S |
| A.thaliana_AT3G21180.1         | LRIGD    | QVPADGVLI | SG  | HS | LAIDESMT  | TGESKIVHK  |  | D      |        |          | OKSPFLMS    | S |
| Aquilegia_caerulea_5           | LKIGD    | QVPADGVLV | VG  | HS | LAIDESMT  | TGEAKIVHK  |  | D      |        |          | HRKDPFLMS   | S |
| A.thaliana_AT5G57110.2         | LNIGN    | QVPADGVLI | SG  | HS | LALDESMT  | TGESKIVNK  |  | D      |        |          | ANKDPFLMS   | S |
| Oryza_sativa_3                 | LKIGD    | QVPADGILI | SG  | HS | LSVDESMT  | TGESKIVHK  |  | D      |        |          | OKSPFLMS    | S |
| Zea_mays_2                     | LKIGD    | QVPTDGILI | SG  | HS | LSIDESMT  | TGESKIVHK  |  | D      |        |          | OKSPFLMS    | S |
| Zea_mays_3                     | LKIGD    | QVPADGILI | YG  | HS | LAIDESMT  | TGESKIVNK  |  | D      |        |          | ORAPFLMS    | S |
| Zea_mays_4                     | LKIGD    | QVPADGVLI | SG  | HS | LAIDESMT  | TGESKVVHK  |  | D      |        |          | OKAPFLMS    | S |
| Selaginella_moellendorffii_6   | LNIGD    | QVPADGVLV | SG  | HS | LSIDESMT  | TGSEPVHV   |  | D      |        |          | GKSPFLHS    | S |
| Selaginella_moellendorffii_7   | LAIGD    | QIPADGLVY | VG  | HS | LIVDESMT  | TGESDPLPK  |  | D      |        |          | EEKPFLLS    | S |
| Aquilegia_caerulea_6           | LAIGD    | QVPADGLFV | SG  | FS | LSINESSLT | TGESDPVMV  |  | N      |        |          | AQNPYMLL    | S |
| Medicago_truncatula_3          | LAIGD    | QVPADGLFV | SG  | FS | LLIDESSLT | TGSEPVVV   |  | N      |        |          | TENPFLLS    | S |
| A.thaliana_AT2G22950.1         | LAIGD    | QVPADGLFI | SG  | FS | VVIDESSLT | TGSEPVVV   |  | T      |        |          | AQNPFLLS    | S |
| A.thaliana_AT4G37640.1         | LAIGD    | QVPADGLFI | SG  | FS | VVIDESSLT | TGSEPVVV   |  | N      |        |          | AQNPFLMS    | S |
| Oryza_sativa_4                 | LSIGD    | QVPADGLFI | SG  | FS | LLINESSLT | TGSEPVAV   |  | N      |        |          | AENPFLLS    | S |
| Zea_mays_5                     | LSIGD    | QVPADGLFV | SG  | FS | MLIDESSLT | TGSEPVAV   |  | S      |        |          | AENPFLLS    | S |
| Oryza_sativa_5                 | LAIGD    | QVPADGLFI | SG  | FS | LLINESSLT | TGSEPVVV   |  | N      |        |          | EDNPFLLS    | S |
| A.thaliana_AT1G27770.1         | LGIGD    | QIPADGLFI | SG  | FS | VLINESSLT | TGSEPVSV   |  | S      |        |          | VEHPFLLS    | S |
| Oryza_sativa_6                 | LAVGD    | QVPADGLFI | SG  | FS | VLVDESST  | TGSEPVFV   |  | N      |        |          | EDNPYLLS    | S |
| Zea_mays_6                     | LGVGD    | QVPADGLFV | SG  | YS | VLVNESST  | TGSEPVVI   |  | S      |        |          | EDNPFLLS    | S |
| Aquilegia_caerulea_7           | LSIGD    | QVPADGFFL | SG  | YS | LVIDESSLS | TGSEPVNI   |  | N      |        |          | QRNPFLLA    | S |
| Oryza_sativa_7                 | LSIGD    | VVPADGLFI | SG  | DC | LMIDESSSL | TGSEPVNI   |  | S      |        |          | EERPFLHA    | S |
| Selaginella_moellendorffii_8   | LSIGD    | QVPADGLFI | SG  | YS | LVIDESSMT | TGSEPVHV   |  | G      |        |          | KNKPFLLS    | S |
| Selaginella_moellendorffii_9   | LGIGD    | QIPADGLLI | YG  | QS | LLVDESCMT | TGSESEMRAK |  | S      |        |          | AEQPFLIS    | S |
| Oryza_sativa_8                 | LKIGD    | VVPADGVFL | DG  | HA | LQVDESMT  | TGEPHPVEV  |  | D      |        |          | AVKSPFLAS   | S |
| Fragilariopsis_cylindrus_13    | LEAGD    | SIPCDGVLV | NY  | DG | LEVDESALT | TGEPEDIDK  |  | D      |        |          | FENDPFLLS   | S |
| Pseudo-nitzschia_multiseriis_4 | LEAGD    | SIPCDGVVV | QY  | DG | LTVDESALT | TGEPEDIEK  |  | D      |        |          | FENDPFLLS   | S |
| Phaeodactylum_tricornutum_4    | VEAGD    | QIPCDGVLL | VA  | DD | VQVDESALT | TGEPDIDVK  |  | S      |        |          | LQNDPFVLS   | S |
| Thalassiosira_pseudonana_6     | INAHNLAS | IPADCVVL  | GPS | GG | LKMDESST  | TGESVLIK   |  |        |        |          | NPGDVVLS    | S |
| Phaeodactylum_tricornutum_5    | INAHNLAS | IPADCVLL  | GPA | TD | LKMDESTLT | TGESKAVSK  |  |        |        |          | KPGDVVLS    | S |
| Phaeodactylum_tricornutum_6    | VNAHNLAS | IPADCVLL  | GPA | GD | LKMDESTLT | TGESKAVSK  |  |        |        |          | KPGDIILS    | S |



|                                |                                                                                                       |
|--------------------------------|-------------------------------------------------------------------------------------------------------|
| Skeletonema_marinoi_ABC        | -----GTVITAGKGLGVVVRTGMDTEMGKIQRGVT--EA-AS-----DEQ-AHRTPLAIKLDEFGDKLTIIG                              |
| Thalassiosira_pseudonana_1     | -----GTVITAGKGVGVVVRTGMDTEMGKIQCGVT--EA-AS-----DEN-AHRTPLAIKLDEFGDLTSVIG                              |
| Thalassiosira_oceanica_1       | -----GTVITSGKGLGVVVRTGMSTEMGKIQRGVT--DA-AA-----DEN-AQRTPLGVKLDEFGDMLSYIIG                             |
| Phaeodactylum_tricornutum_1    | -----GTMVTSGSGKAVVVTGMTTQFGKIQQGVT--AA-KA-----EQ---PKTPLAIKLDEFGLTIIIG                                |
| Fragilariopsis_cylindrus_1     | -----GTTIVNGGGIAIVVATGSQTEFGKIQSGVM--DA-KK-----DNKTENKTPLTKOLDEFGNQLTKLIG                             |
| Fragilariopsis_cylindrus_2     | -----GTTIVNGGGIAIVVATGSQTEFGKIQSGVM--DA-KK-----DNKTENKTPLTKOLDEFGNQLTKLIG                             |
| Fragilariopsis_cylindrus_3     | -----GTTIVNGGGIAIVVATGSQTEFGKIQSGVM--DA-KK-----DNKTENKTPLTKOLDEFGNQLTKLIG                             |
| Fragilariopsis_cylindrus_4     | -----GTTIVNGGGIAIVVATGSQTEFGKIQSGVM--DA-KK-----DNKTENKTPLTKOLDEFGNQLTKLIG                             |
| Fragilariopsis_cylindrus_5     | -----GTTIVNGGGIAIVVATGSQTEFGKIQSGVM--DA-KK-----DNKTENKTPLTKOLDEFGNQLTKLIG                             |
| Fragilariopsis_cylindrus_6     | -----GTTIVNGGGIAIVVATGSQTEFGKIQSGVM--DA-KK-----DNKTENKTPLTKOLDEFGNQLTKLIG                             |
| Fragilariopsis_cylindrus_7     | -----GTTIVNGGGIAIVVATGSQTEFGKIQSGVM--DA-KK-----DNKTENKTPLTKOLDEFGNQLTKLIG                             |
| Fragilariopsis_cylindrus_8     | -----GTTIVNGGGIAIVVATGSQTEFGKIQSGVM--DA-KK-----DNKTENKTPLTKOLDEFGNQLTKLIG                             |
| Pseudo-nitzschia_multiseries_1 | -----GTTVVSGAAVALVATGESTEFGRIOSGVL--EA-KR-----DSH-DQKTPLAQQDDFGNQLTGLIG                               |
| Thalassiosira_pseudonana_2     | -----GSLVTRGSGTALVVRTGTSTQMGIQSTLA--EA-OS-----ETD-ERKTPLGEQLDQFGTTLTSYVIG                             |
| Ostreococcus_lucimarinus_1     | -----GTAVSNGCCLCVNSTGMSTEIGKIQSQIK--EA-SE-----EE---EDTPLKOKLDRFGEALTMIG                               |
| Zea_mays_1                     | -----GTTVVNGSAVCVVTGTGMTEIGKIHAQIQ--EA-SQ-----EE---DDTPLKKKLNEFGEALTAIIG                              |
| Oryza_sativa_1                 | -----GTTIVNGSAVCVVTGTGMTEIGKIHAQIQ--EA-SQ-----EE---DDTPLKKKLNEFGEALTAIIG                              |
| Aquilegia_caerulea_1           | -----GTTVVNGNCICLVITGTGMNTEIGSLHSQIQ--EA-SQ-----SE---EDTPLKKKLNEFGEALTAIIG                            |
| A.thaliana_AT1G07810.1         | -----GTTVVNGNCICLVITGTGMNTEIGRVHSQIQ--EA-AQ-----HE---EDTPLKKKLNEFGEVLTMIIG                            |
| A.thaliana_AT1G07670.1         | -----GTTVVNGNCICLVITGTGMNTEIGRVHSQIQ--EA-AQ-----HE---EDTPLKKKLNEFGEALTAIIG                            |
| Medicago_truncatula_1          | -----GTTVVNGHCFCLVTGTGMTEIGKVHNOIH--EA-SQ-----SE---EDTPLKKKLNEFGERLTMMIG                              |
| Glycine_max_1                  | -----GTTVVNGNSICLVITGTGMTEIGKVHMQIH--VA-SQ-----SE---EDTPLKKKLNEFGEKLTIIIG                             |
| Glycine_max_2                  | -----GTTVVNGNCICLVITGTGMTEIGKVHMQIH--VA-SQ-----SE---EDTPLKKKLNEFGEKLTMIIG                             |
| Aquilegia_caerulea_2           | -----GTTVVNGNCICLVITGTGMNTEIGKVHSQIH--AA-AQ-----EE---EDTPLKKKLNEFGEALTAIIG                            |
| Selaginella_moellendorffii_1   | -----GTTIVNGCCVGVVSTGMFTEIGKIQAQIQ--EA-SM-----QD---DDTPLKKKLDEFGERLTIVVIG                             |
| Physcomitella_patens_1         | -----GTTIVNGCFLSVVITGTGMKTEIGKIQSQIQ--EA-SL-----EE---ADTPLKKKLDEFGELLTKVIG                            |
| Physcomitella_patens_2         | -----GTTIVNGSFLSMVMTGTGMKTEIGKIQSQIQ--EA-SK-----EE---ADTPLKKKLDEFGELLTKVIG                            |
| Physcomitella_patens_3         | -----GTVVNGCFVSVVSTGMNTEIGKIQSQIA--EA-SL-----EE---ADTPLKKKLDEFGERLTIVVIG                              |
| Selaginella_moellendorffii_2   | -----GTTVVNGSCFCIVTSTGMNTEIGKIQAQIQ--EA-AL-----EE---DDTPLKKKLDEFGERLTFVIG                             |
| Glycine_max_3                  | -----GTTVVNGSCVCIVITGTGMTEIGKIHKQIH--EA-SQ-----EE---SDTPLKKKLDEFGNRLTTAIG                             |
| Glycine_max_4                  | -----GTTVVNGSCVCIVITGTGMTEIGKIHKQIH--EA-SQ-----EE---SDTPLKKKLDEFGNRLTTAIG                             |
| Aquilegia_caerulea_3           | -----GTTIMNGSICVUVSTGMNTEIGKIQTQIH--EA-SL-----EE---TDTPLKKKLDEFGGRLTTAIG                              |
| A.thaliana_AT4G00900.1         | -----GTTVVNGSCVCIVTSIGMDTEIGKIQRQIH--EA-SL-----EE---SETPLKKKLDEFGSRLTTAIC                             |
| Chlamydomonas_reinhardtii_1    | -----GTAIANGSCSAVVTSIGMTEIGKIQEQIS--AA-AK-----ED---DDTPLKKKLDEFGEMLAKVIA                              |
| Volvox_carteri_1               | -----GTAIANGSCSAVVTSIGMTEIGKIQAQIS--EA-AK-----ED---DDTPLKKKLDEFGEMLAKVIA                              |
| Micromonas_pusilla_1           | -----GTAASQGACVAIVTHTGMRTTEIGKIQAQIQ--AA-SE-----EE---EDTPLKOKLDRFGDQLTWGIG                            |
| Micromonas_sp_1                | -----GTSVSQGACVAVIDTGMRTTEIGKIQAQIQ--AA-AE-----EE---DDTPLKOKLDRFGDQLTLMIG                             |
| Selaginella_moellendorffii_3   | -----GTTVVNGSICIVITGTGMNTEIGKIQTQIQ--DA-SL-----SD---YDSPLTRKLDDEFADVLTKVVA                            |
| Thalassiosira_oceanica_2       | -----TTTVVGGIARGIVTDIGMTEIGKIQQAVQ--SA-GE-----DE---EDTPLKKKLNEFGDMLSQVIG                              |
| Thalassiosira_pseudonana_3     | -----TTTVVGGIARGIVTDIGMTEIGKIQQAVQ--GA-AE-----DE---EDTPLKKKLDEFGDMLSQVIG                              |
| Pseudo-nitzschia_multiseries_2 | -----GTTISGGKAIQVVTATGMNTEIGKIQSAVT--EA-SE-----DA---EKTPLNOKLDEFGDLLTQVIT                             |
| Fragilariopsis_cylindrus_9     | -----GTTISGGKAIQVCSIGMTEIGKIQSAVS--EA-SE-----EQ---EKTPLTQKLDEFGDLLTKVIT                               |
| Fragilariopsis_cylindrus_10    | -----GTTISGGKAIQVCSIGMTEIGKIQSAVS--EA-SE-----EQ---EKTPLTQKLDEFGDLLTKVIT                               |
| Aquilegia_caerulea_4           | -----GTVVAGRARAVVGVGSNTAMGGIRDAML--RT-TD-----RT---EVTPLKKKLDEFGTFLAKVIA                               |
| Glycine_max_5                  | -----GTMVAGRARAVVGVGPNTAMGSIHDSML--RT-ED-----RT---EVTPLKKKLDEFGTFLAKVIA                               |
| Medicago_truncatula_2          | -----GTVVAGRARAVVGVGPNTAMGSIHDSML--QT-ED-----QT---EVTPLKKKLDEFGTFLAKVIA                               |
| A.thaliana_AT1G10130.1         | -----GTDVVAGRRAVVGVSNTAMGSIHDSML--QT-DD-----QT---EATPLKKKLDEFGSFLAKVIA                                |
| Oryza_sativa_2                 | -----LHLNEYGHFLLSIRFIAVILYLLSAFFASKGTVVVAGRARAVVIGVSNAMGSIHDSML--RT-ED-----RT---EATPLKKKLDEFGTFLAK--- |
| Selaginella_moellendorffii_4   | -----GTVVAGRARAVVATGSETAMGSIHDSAMS--EV-TE-----EV---EMTPLKQDLNFGEFLLSKVIA                              |
| Micromonas_pusilla_2           | -----GTVVTVGRCRGVVGTGLNTAIGKIRDAMT--EA-AA-----EE---EMTPLKKKLDEFGTLLSKVIA                              |
| Micromonas_sp_2                | -----GTVVTVGRAGVAVVATGMSTAIGQIQNAVIT--EV-DC-----MD---ETPLKRRKLDEFGTFLSKVIA                            |
| Volvox_carteri_2               | -----GTLVTSGRARGVVGTGASTAIGRIDALA--SA-DE-----D---QRTPLKOKLDEFGTLLSKVIA                                |
| Chlamydomonas_reinhardtii_2    | -----GTLVTSGRGRGIVVGTGASTAIGRIDALS--AA-DG-----AD---EKTPLKOKLDEFGTLLSKVIA                              |
| Dunaliella_salina_1            | -----GTLVVAGRARIVVGTGSSTAIGKIRDAMS--VE-ED-----VE---VVTPLKAKLDEFGALLSKVIA                              |
| Ostreococcus_lucimarinus_2     | -----GTTVTVGKATCVVVGTSNTAMGKIQHTLE--QT-EE-----QT---ELTPLKKKLDEFGNLLGKIIA                              |
| Phaeodactylum_tricornutum_2    | -----GSLVNAGRGRALVIAVGVSTEFKVAATELS--SV-AS-----SV---RKSPLQIKIDELGQRLAGLSS                             |
| Chlamydomonas_reinhardtii_3    | -----ATNVVSGQGRGVVATGDSAEIGQINKMVG--TV-ES-----TV---ARNNLVHOLEVLGRWLVLVL                               |
| Chlamydomonas_reinhardtii_4    | -----ATNVVSGQGRGVVATGDSAEIGQINKMVG--TV-ES-----TV---ARNNLVHOLEVLGRWLVLVL                               |
| Thalassiosira_pseudonana_4     | -----ATLVAQSSGIGIAISTGDFTOIGTINRLVN--NT-ET-----NT---IKTDVLKQIDMVSKYLFIAIC                             |
| Thalassiosira_pseudonana_5     | -----ATLVAQSSGIGVAIATGDFTOIGTINLLVN--NT-OS-----NT---IETDVLKQIDQISKYLFVAIC                             |

|                                |                                                         |                             |
|--------------------------------|---------------------------------------------------------|-----------------------------|
| Fragilariopsis_cylindrus_11    | -----ATLIATGSGVGATSTGDNTEIGTINKLVN--NV-EK-----          | -----KKTAVLEQIDTISIYLAVFIL  |
| Fragilariopsis_cylindrus_12    | -----ATLIATGSGVGATSTGDNTEIGTINKLVN--NV-EK-----          | -----KKTAVLEQIDTISIYLAVFIL  |
| Pseudo-nitzschia_multiseriis_3 | -----ATLIAQSGSGVIAVATSTGDNTEIGTINKLVN--SQ-EK-----       | -----TKTAVLEQIDTISLYLAGFIM  |
| Phaeodactylum_tricornutum_3    | -----ATLVAQGYGVGVVCTGDNTEIGTINSLVN--KV-ET-----          | -----KRTAVLEQIDFVSKVLACFIF  |
| Micromonas_pusilla_3           | -----SCNVKAGACLGLVVATGMRTRKKK--EPCLP--DT-KS-----        | -----GQSPLQENLEKLVKLGMAI    |
| Micromonas_sp_3                | -----SCNVKAGTCIGLVVATGMRTRAKK--EGCLP--DT-KA-----        | -----GQTPLOANLEALSIKLGMAI   |
| Chlamydomonas_reinhardtii_5    | -----GTTVNEGSGHMLVLAVGVHSEWGKTALVN--EA-GD-----          | -----DETPLOEQLTDVAAKVSCKMGV |
| Chlamydomonas_reinhardtii_6    | -----GTTVNEGSGHMLVVAVGVNSEWGKTALVN--EA-GD-----          | -----DETPLOEQLTDVAAKVSCKMGV |
| Volvox_carteri_3               | -----GTTVNEGSGHVLIVAVGPHSEWGKTALVS--EA-GD-----          | -----DQTPLOEQLTDVAAKVSCKMGV |
| Volvox_carteri_4               | -----GTTVNEGSGHVLIVAVGPHSEWGKTALVS--EA-GD-----          | -----DQTPLOEQLTDVAAKVSCKMGV |
| Volvox_carteri_5               | -----GTQVTEGSGHVLIVAVGNSTWGKTALVLT--EA-GD-----          | -----DETPLOEKLGVLTAIGKIGF   |
| Chlamydomonas_reinhardtii_7    | -----GTQVTEGSGRVLVTAVGNSTWGKTALVS--EA-GD-----           | -----DETPLOOKLEVLAGAIGKVG   |
| Chlamydomonas_reinhardtii_8    | -----GTQVTEGSGKLLVVAVGENSEWGKTALVG--EA-GD-----          | -----DETPLOVKLTWVASTVGVKIGF |
| Volvox_carteri_6               | -----GTQVTEGSGKLLIVAVGENSEWGKTALVG--EA-GD-----          | -----DETPLOVKLTWVASTVGVKIGF |
| Ostreococcus_lucimarinus_3     | -----GTSISEGSGKALIIAVGSRSQWVILKTLIV--EP-----            | -----SDTPLOERLERLVLLIGNFGI  |
| Micromonas_sp_4                | -----GTTISEGSGRMVVIAVGSSSQWVILKTLIV--EP-----            | -----SSTPLODRDLVLVVTVGNFGI  |
| Selaginella_moellendorffii_5   | -----GCKVVDGYGTLLITVGVINTEWGRAMAALT--DD-SD-----         | -----EETPLOMRLAGAAATVGAIGL  |
| A.thaliana_AT3G21180.1         | -----GCKVADGVGNMLVTGVGINTEWGLLMASIS--ED-TG-----         | -----EETPLOVRLNGLATFIGIVGL  |
| Aquilegia_caerulea_5           | -----GCKVADGYGTMLVTVGVINTEWGLLMASIS--ED-TG-----         | -----EETPLOVRLNGVATFIGIVGL  |
| A.thaliana_AT5G57110.2         | -----GCKVADGNGSMLVTGVGVINTEWGLLMASIS--ED-NG-----        | -----EETPLOVRLNGVATFIGISIGL |
| Oryza_sativa_3                 | -----GCKVADGYGTMLVTVGVINTEWGLLMASIS--ED-SG-----         | -----EETPLOVRLNGVATFIGMVGL  |
| Zea_mays_2                     | -----GCKVADGYGTMLVTVAVGINTEWGLLMASIS--ED-SG-----        | -----EETPLOVRLNGVATFIGMVGL  |
| Zea_mays_3                     | -----GCKVADGYGSMLVTVGVINTEWGLMANLS--ED-IG-----          | -----EETPLOVRLNGVATFIGIVGL  |
| Zea_mays_4                     | -----GCKVADGYGSMLVTVGVINTEWGLMANLS--ED-NG-----          | -----EETPLOVRLNGVATFIGLVGL  |
| Selaginella_moellendorffii_6   | -----GCKVVDGYGSMLITVGVINTEWQVMATLD--DD-SS-----          | -----EETPLOVRLNGVATFIGKIGL  |
| Selaginella_moellendorffii_7   | -----GTKVLDGFGTMLVTVAVGMRTWGRVMATLS--ED-ND-----         | -----EETPLOVRLNNLATIIGKVGL  |
| Aquilegia_caerulea_6           | -----GTKVQDGSCKMLVTTVGMRTQWGLLATLS--EG-GD-----          | -----DETPLOVKLNGVATIIGKIGL  |
| Medicago_truncatula_3          | -----GTKVQDGSCKMLVTTVGMRTQWGLMATLS--EG-GD-----          | -----DETPLOVKLNGVATIIGKIGL  |
| A.thaliana_AT2G22950.1         | -----GTKVQDGSCKMLVTTVGMRTQWGLMATLS--EG-GD-----          | -----DETPLOVKLNGVATIIGKIGL  |
| A.thaliana_AT4G37640.1         | -----GTKVQDGSCKMMITTVGMRTQWGLMATLT--EG-GD-----          | -----DETPLOVKLNGVATIIGKIGL  |
| Oryza_sativa_4                 | -----GTKVQDGSCKMLVTTVGMRTQWGLMATLS--EG-GD-----          | -----DETPLOVKLNGVATIIGKIGL  |
| Zea_mays_5                     | -----GTKVQDGSCKMLVTTVGMRTQWGLMATLS--EG-GD-----          | -----DETPLOVKLNGVATIIGKIGL  |
| Oryza_sativa_5                 | -----GTKVQDGSCKMLVTTVGMRTQWGLMATLS--EG-GD-----          | -----DETPLOVKLNGVATIIGKIGL  |
| A.thaliana_AT1G27770.1         | -----GTKVQDGSCKMLVTTVGMRTQWGLMATLS--EG-GD-----          | -----DETPLOVKLNGVATIIGKIGL  |
| Oryza_sativa_6                 | -----GTKVLDGSCIMLVTVAVGMRTQWGLMAVLT--DG-GD-----         | -----DETPLOQTRLNGVANTIGKIGL |
| Zea_mays_6                     | -----GTKVLDGSCIMLVTVAVGMRTQWGLMAAIT--ES-GD-----         | -----DETPLOQKLNQVANTIGNIGL  |
| Aquilegia_caerulea_7           | -----GTKVQDGSCKMLIASVGMRTWGRMLMETLS--EG-GE-----         | -----DETPLOVKLNGVATIIGKIGL  |
| Oryza_sativa_7                 | -----GNKVVDGAAKMLVTVAVGTRTEWGRKIMGTLN--GD-GV-----       | -----DETPLOVKLNGVATIIGQIGL  |
| Selaginella_moellendorffii_8   | -----GTKVQDGSALMLVTVGVMNTEWGHMAVVG--EG-GD-----          | -----DETPLOVRLNGVATLIGKIGL  |
| Selaginella_moellendorffii_9   | -----GTKVQDGSVMIVTVGVMNTEWGHSMISLGEDS--GQ-----          | -----SETPLOHKLQDLATLIGKIGL  |
| Oryza_sativa_8                 | -----GVKVVDGYGKMVTVAVGTDTAWGEEMRTIT--RE-NT-----         | -----DPTPLOERLEGLTSSIGKIGI  |
| Fragilariopsis_cylindrus_13    | -----GCTAVAGSGRFVAIAVGNPSQWVVKSHLEQ--EQ-----            | -----EETPLOEKLDIMAANIGYVGM  |
| Pseudo-nitzschia_multiseriis_4 | -----GCTVAVAGSTRFVAVAVGNPSQWVVKSHLEK--EQ-----           | -----EETPLOEKLDMAAKIGYVGM   |
| Phaeodactylum_tricornutum_4    | -----GCTMEAGTARFLAIAVGNKSWQVGIKAHLDK--EH-----           | -----SQTPLOEKLDMAAMIGYIGM   |
| Thalassiosira_pseudonana_6     | -----GTTAVQGSAKMVIIVAVGINSVAGKIAHVY--DS-SDHEGEGLEGD--   | -----DESPFLFTKLEKIAQIGIAGT  |
| Phaeodactylum_tricornutum_5    | -----GTTNVQGSQAKLVVAVGIVHSVAGKIRAQVY--ES-EDHRDDLGGDD--  | -----EESPLFVKLVNLAKRIGIAGT  |
| Phaeodactylum_tricornutum_6    | -----GTTASQSGSKMVIIVAVGIVHSVAGKIKARVY--ES-EDHEDELGGDD-- | -----EHSPLFFKINAIKRVGIAGT   |

|                                 |                  |          |                                                              |                                |
|---------------------------------|------------------|----------|--------------------------------------------------------------|--------------------------------|
| Skeletonema_marinoi_ABC         | LICVGVVVASIPKF   | NDPTFKQ  | PIEGAIYYAKVAVALGVAAI                                         | QRLPAVITLCLSLGTRRMAKRNIVRKLPSV |
| Thalassiosira_pseudonana_1      | VICTAVVVASIPKF   | YDPTFKT  | PVEGAVVYAKVAVALGVAALPEGLPAVITLCLSLGTRRMAKRNIVRKLQSV          |                                |
| Thalassiosira_oceanica_1        | GICIAVWVASIPRF   | HDPMFKS  | PEGAVVYAKVAVALGVAALPEGLPAVITLCLSLGTRRMAKRNIVRKLPSV           |                                |
| Phaeodactylum_tricornutum_1     | VICLAVWIVSIPKM   | NDPSFGS  | VWVGAVVYAKVAVALGVAALPEGLPAVITLCLSLGTRRMAERNIVRKLQSV          |                                |
| Fragilariopsis_cylindrus_1      | LICGLVWIASIPKMLT | SNIFNS   | KLEGIYYTKVAVALGVAALPEGLPAVITLCLSLGTRRMAQRNVIVRHLPSV          |                                |
| Fragilariopsis_cylindrus_2      | LICGLVWIASIPKMLT | SNIFNS   | KLEGIYYTKVAVALGVAALPEGLPAVITLCLSLGTRRMAQRNVIVRHLPSV          |                                |
| Fragilariopsis_cylindrus_3      | LICGLVWIASIPKMLT | SNIFNS   | KLEGIYYTKVAVALGVAALPEGLPAVITLCLSLGTRRMAQRNVIVRHLPSV          |                                |
| Fragilariopsis_cylindrus_4      | LICGLVWIASIPKMLT | SNIFNS   | KLEGIYYTKVAVALGVAALPEGLPAVITLCLSLGTRRMAQRNVIVRHLPSV          |                                |
| Fragilariopsis_cylindrus_5      | LICGLVWIASIPKMLT | SNIFNS   | KLEGIYYTKVAVALGVAALPEGLPAVITLCLSLGTRRMAQRNVIVRHLPSV          |                                |
| Fragilariopsis_cylindrus_6      | LICGLVWIASIPKMLT | SNIFNS   | KLEGIYYTKVAVALGVAALPEGLPAVITLCLSLGTRRMAQRNVIVRHLPSV          |                                |
| Fragilariopsis_cylindrus_7      | LICGLVWIASIPKMLT | SNIFNS   | KLEGIYYTKVAVALGVAALPEGLPAVITLCLSLGTRRMAQRNVIVRHLPSV          |                                |
| Fragilariopsis_cylindrus_8      | LICGLVWIASIPKMLT | SNIFNS   | KLEGIYYTKVAVALGVAALPEGLPAVITLCLSLGTRRMAQRNVIVRHLPSV          |                                |
| Pseudo-nitzschia_multiseriata_1 | VICAAVWFASIPKMA  | KDSTVFSS | PFEGMVYAKVAVALGVAALPEGLPAVITLCLSLGTRRMAQRNVIVRNLPSV          |                                |
| Thalassiosira_pseudonana_2      | GICLAVWIASVPRF   | SDSAFST  | WLEGAIYYAKVGVVALGVAALPEGLPAVITLCLSLGTRRMAERNIVRKLPSV         |                                |
| Ostreococcus_lucimarinus_1      | VICLLVWLINRHFVQ  | FEFKAGS  | TIPSAVFDLVKCTYYFKIAIALAVAAIPEGLPAVITLCLSLGTRKMAKKNIVRKLPSV   |                                |
| Zea_mays_1                      | VICALVWLINLKYFLS | WEYVDG   | WPTNFKFSFEKCTYYFEIAVALAVAAIPEGLPAVITLCLALGTRKMAQKNALVRKLPSV  |                                |
| Oryza_sativa_1                  | VICALVWLINVKYFLT | WEYVDG   | WPRNFKFSFEKCTYYFEIAVALAVAAIPEGLPAVITLCLALGTRKMAQKNALVRKLPSV  |                                |
| Aquilegia_caerulea_1            | VICALVWLINVKYFLT | WEYVDG   | WPTNFHFSFEKCTYYFEIAVALAVAAIPEGLPAVITLCLALGTRKMAQKNALVRKLPSV  |                                |
| A.thaliana_AT1G07810.1          | LICALVWLINVKYFLS | WEYVDG   | WPRNFKFSFEKCTYYFEIAVALAVAAIPEGLPAVITLCLALGTRKMAQKNALVRKLPSV  |                                |
| A.thaliana_AT1G07670.1          | LICALVWLINVKYFLS | WEYVDG   | WPRNFKFSFEKCTYYFEIAVALAVAAIPEGLPAVITLCLALGTRKMAQKNALVRKLPSV  |                                |
| Medicago_truncatula_1           | LICILVWLINVKYFLT | WDYVDDG  | WWPTNFKFSFEKCTYYFEIAVALAVAAIPEGLPAVITLCLALGTRKMAQKNALVRKLPSV |                                |
| Glycine_max_1                   | LICILVWLINVKYFLS | WEYVDG   | WPRNFKFSFEKCTYYFEIAVALAVAAIPEGLPAVITLCLALGTRKMAQKNALVRKLPSV  |                                |
| Glycine_max_2                   | LICILVWLINVKYFLS | WEYVDG   | WPRNFKFSFEKCTYYFEIAVALAVAAIPEGLPAVITLCLALGTRKMAQKNALVRKLPSV  |                                |
| Aquilegia_caerulea_2            | IICALVWLINVKYFLT | WEYVDG   | WPNFKFSFEKCTYYFEIAVALAVAAIPEGLPAVITLCLALGTRKMAQKNALVRKLPSV   |                                |
| Selaginella_moellendorffii_1    | VICLLVWIINRYKFLT | WDYADG   | WPTNVRFSEKCTYYFEIAVALAVAAIPEGLPAVITLCLALGTRKMAQKNIVRKLPSV    |                                |
| Physcomitella_patens_1          | VICLLVWIINRYKFLS | WEMKDG   | WPTNFQFSFEKCTYYFKIAVALAVAAIPEGLPAVITLCLALGTRKMAAKNAIVRKLPSV  |                                |
| Physcomitella_patens_2          | VICLLVWVINYKYFLS | WEMKDG   | WPRNFQFSFEKCTYYFKIAVALAVAAIPEGLPAVITLCLALGTRKMAAKNAIVRKLPSV  |                                |
| Physcomitella_patens_3          | VICVLVWMINYKFLS  | WDMKNG   | FPTNFRFSFEKCTYYFKIAVALAVAAIPEGLPAVITLCLALGTRKMAAKNAIVRKLPSV  |                                |
| Selaginella_moellendorffii_2    | MICLLVWVINYKYFLS | WDVVG    | WPRNVRFSEKCTYYFEIAVALAVAAIPEGLPAVITLCLALGTRKMAQKNIVRKLPSV    |                                |
| Glycine_max_3                   | LVCLIVWVINYKNFIS | WEYVDG   | WPSNINFSFKCTYYFKIAVALAVAAIPEGLPAVITLCLALGTRKMAQKNIVRKLPSV    |                                |
| Glycine_max_4                   | LVCLIVWVINYKNFIS | WDVVDG   | WPSNFKFSFKCTYYFKIAVALAVAAIPEGLPAVITLCLALGTRKMAQKNIVRKLPSV    |                                |
| Aquilegia_caerulea_3            | IVCLIVWVINYKNFLT | WDVVG    | WPTNFRFSFEKCTYYFKIAVALAVAAIPEGLPAVITLCLALGTRKMAAKNAIVRKLPSV  |                                |
| A.thaliana_AT4G00900.1          | IVCVLWVMINYKNFVS | WDVVDG   | YKPVNFKFSFEKCTYYFKIAVALAVAAIPEGLPAVITLCLALGTRKMAQKNIVRKLPSV  |                                |
| Chlamydomonas_reinhardtii_1     | AICVWVWLINYEHFVT | FTWKPEG  | GLPGVAFNLSKATYYFKIAVALAVAAIPEGLPAVITLCLALGTRTMAKKNIVRKLPSV   |                                |
| Volvox_carteri_1                | AICVIVWLINYHFLT  | ITFKPEG  | GLPTFSFNLSKATYYFKIAVALAVAAIPEGLPAVITLCLALGTRTMAKKNIVRKLPSV   |                                |
| Micromonas_pusilla_1            | LVCLFVWLMNYKFFIS | WKRAPGS  | FVYDVEFNFAKCTYYFKIAVALAVAAIPEGLPAVITLCLALGTRKMAAKNAIVRKLQSV  |                                |
| Micromonas_sp_1                 | VICLLVWLMNYHFFIS | WKWGLSDP | FSITEVDFNFAKCTYYFKIAVALAVAAIPEGLPAVITLCLALGTRKMAAKNAIVRKLQSV |                                |
| Selaginella_moellendorffii_3    | AICGLVWVINYKYFLT | WDVSNGL  | PSNVQFDVQGATYYFKVAVALAVAAIPEGLPAVITLCLALGTRRMAEENIVRKLPSV    |                                |
| Thalassiosira_oceanica_2        | VICILVWAINYSHF   | FDPVHGS  | VFKGCIYYFKIAVALAVAAIPEGLPTVITLCLALGTRKMAAKNAIVRKLPSV         |                                |
| Thalassiosira_pseudonana_3      | VICLLVWAINYNHF   | FDPVHGS  | VFKGCIYYFKIAVALAVAAIPEGLPTVITLCLALGTRKMAAKNAIVRKLPSV         |                                |
| Pseudo-nitzschia_multiseriata_2 | GICVLVWVMNFNQF   | SDPVFGG  | VFKGCIYYLKIIVALGVAALPEGLPAVITLCLALGTRKMAKKNIVRKLPSV          |                                |
| Fragilariopsis_cylindrus_9      | AICVLVWVMNKNKF   | FDPVFGG  | IFKGCIIYYLKIIVALGVAALPEGLPAVITLCLALGTRKMAKKNIVRRLPSV         |                                |
| Fragilariopsis_cylindrus_10     | AICVLVWVMNKNKF   | FDPVFGG  | IFKGCIIYYLKIIVALGVAALPEGLPAVITLCLALGTRKMAKKNIVRRLPSV         |                                |
| Aquilegia_caerulea_4            | GICVLVWIVNIGHF   | RDPAHGG  | FLRGAIHYFKIAVALAVAAIPEGLPAVTTCLALGTRKMARLNIVRSLPSV           |                                |
| Glycine_max_5                   | GICVLVWIVNIGHF   | RDPHGG   | FLRGAIHYFKIAVALAVAAIPEGLPAVTTCLALGTRKMARLNIVRSLPSV           |                                |
| Medicago_truncatula_2           | GICVLVWIVNIGHF   | RDPHGG   | FVHGAIHYFKIAVALAVAAIPEGLPAVTTCLALGTRKMARLNIVRSLPSV           |                                |
| A.thaliana_AT1G10130.1          | GICVLVWVNIHGF    | SDPSHGG  | FFKGAIHYFKIAVALAVAAIPEGLPAVTTCLALGTRKMARLNIVRSLPSV           |                                |
| Oryza_sativa_2                  |                  | KHRF     | LKLRHTLFSQVAVALAVAAIPEGLPAVTTCLALGTRKMARLNIVRSLPSV           |                                |
| Selaginella_moellendorffii_4    | GICVLVWVNIHGF    | RDPAHGG  | ILRGAIYYLKIIVALAVAAIPEGLPAVTTCLALGTRKMASLNIVRSLPAV           |                                |
| Micromonas_pusilla_2            | VVCVLVWVNIHGF    | ADKAHGG  | MLRGAIYYFKIAVALAVAAIPEGLPAVTTCLALGTRKMAKQNAIVRSLPSV          |                                |
| Micromonas_sp_2                 | AICILVWLINIRHF   | RDYAHGG  | IFRGAIHYFKVAVALAVAAIPEGLPAVTTCLALGTRKLAQKAIVRTLSSV           |                                |
| Volvox_carteri_2                | AICVIVWLMNIRRF   | SDPALGG  | WLSGALYYLKIIVALAVAAIPEGLPAVTTCLALGTRKMAKQNAIVRSLPSV          |                                |
| Chlamydomonas_reinhardtii_2     | TICVIVWLMNINRF   | KDPALGG  | WLSGALYYLKIIVALAVAAIPEGLPAVTTCLALGTRKMAKQNAIVRSLPSV          |                                |
| Dunaliella_salina_1             | GICVLVWVNIHGF    | NDPALGG  | WFOGAIHYFKIAVALAVAAIPEGLPAVTTCLALGTRKMARHNAIVRTLPSV          |                                |
| Ostreococcus_lucimarinus_2      | VICILVWVNIHGF    | ADKAHGG  | LLRGAVYYFKIAVALAVAAIPEGLPAVTTCLALGTRRMAKKNALVRTLPSV          |                                |
| Phaeodactylum_tricornutum_2     | IAISIIAMLGWI     |          | LGRPFLETLTVAVALAVAAIPEGLPTVITLCLALGTRMARRNAIIRKLPSV          |                                |
| Chlamydomonas_reinhardtii_3     | AIGLAFLLALLHA    |          | DOGFKEAFESAVSIAVAIVPEGLPAVTTIVLAIGTTVMARRNAIIRQLPAV          |                                |
| Chlamydomonas_reinhardtii_4     | AIGLAFLLALLHA    |          | DOGFKEAFESAVSIAVAIVPEGLPAVTTIVLAIGTTVMARRNAIIRQLPAV          |                                |
| Thalassiosira_pseudonana_4      | TMCLATFFVAFYSDN  |          | YKKDALGSINIALTCAVAMVPEGLEAIVTLTYSYAVKVMASQNAIVRALPAV         |                                |
| Thalassiosira_pseudonana_5      | TMCLGTFVAFYSDS   |          | YKKNALSSVNIALTCAVAMVPEGLEAIVTLVYSYAVKVMATQNAIVRALPAV         |                                |

|                                |                                                                           |       |                       |                                                                                                         |                                                                                                         |
|--------------------------------|---------------------------------------------------------------------------|-------|-----------------------|---------------------------------------------------------------------------------------------------------|---------------------------------------------------------------------------------------------------------|
| Fragilariopsis_cylindrus_11    | I I A L I T F L Y E F L V N                                               | ----- | -----                 | K N N P L L S V N T A L V C A V A M I P E G L E A I V T V T Y A W A V S K M A T Q N A I V R A L P A V   |                                                                                                         |
| Fragilariopsis_cylindrus_12    | I I A L I T F L Y E F L V N                                               | ----- | -----                 | K N N P L L S V N T A L V C A V A M I P E G L E A I V T V T Y A W A V S K M A T Q N A I V R A L P A V   |                                                                                                         |
| Pseudo-nitzschia_multiseriis_3 | L V A L I T F L Y E W L H S                                               | ----- | -----                 | G T S P L M A L N T S L V C A V A M I P E G L E A I V T V T Y A W S V S K M A T L N A I V R A L P A V   |                                                                                                         |
| Phaeodactylum_tricornutum_3    | V T A I I T W L V A F Y R I                                               | ----- | -----                 | D A S A I D A L S I A L V C A V A M I P E G L E A I V T M T Y S W S V S V M A K H N A I I R V L P A V   |                                                                                                         |
| Micromonas_pusilla_3           | A V C I V V F I V G V S L N T K                                           | ----- | D P E D Q             | D T P S W L F M I L V A V T I T V A A I P E G L P L C V T I A L T S G C A E M V K E N V L V R K I A A V |                                                                                                         |
| Micromonas_sp_3                | A V C L G V F I V G A S M G T K                                           | ----- | D P E D P             | D V P S W L F M I M V A V T I T V A A I P E G L P L C V T I A L S S G C A N M V K E N V L M R K I A A V |                                                                                                         |
| Chlamydomonas_reinhardtii_5    | L V A V V C F L A L L I K W L I                                           | ----- | V T G G G D I D K I   | N D N G P L Q F L L Y A I T I T V V S I P E G L P L A V T L T L A Y S M K K M M K D N N F V R V L S A C |                                                                                                         |
| Chlamydomonas_reinhardtii_6    | L V A V V C F L A L L I K W L I                                           | ----- | V T G G G D A S K I   | N D N G P L Q F L L Y A I T I T V V S I P E G L P L A V T L T L A Y S M K K M M K D N N F V R V L S A C |                                                                                                         |
| Volvox_carteri_3               | L V A V V C F L A L L I K W L I                                           | ----- | V H K G G D V K K I   | N D N G P L Q F L L Y A I T I T V V S I P E G L P L A V T L T L A Y S M K K M M R D K N F V R V L S A C |                                                                                                         |
| Volvox_carteri_4               | L V A V V C F L A L L I K W L I                                           | ----- | V H K G G D V K K I   | N D N G P L Q F L L Y A I T I T V V S I P E G L P L A V T L T L A Y S M K K M M R D K N F V R V L S A C |                                                                                                         |
| Volvox_carteri_5               | L V A V C C F I A Q L I K W C V                                           | ----- | V N K G F P I K K I   | N D N G P I Q F F L Y A I T I I V V A V P E G L P L A V T I S L A Y S M K K M M T D N N F V R V L A A C |                                                                                                         |
| Chlamydomonas_reinhardtii_7    | A V A I C C F I A Q L I K W C V                                           | ----- | E N N G F P I S E I   | N N N G P I Q F F L Y A I T I I V V A V P E G L P L A V T I S L A Y S M K K M M A D Q N F V R V L A A C |                                                                                                         |
| Chlamydomonas_reinhardtii_8    | G V A I C C F A A L L I K W C V                                           | ----- | V N G G F P V S K I   | N Q N G P I Q F F L Y A I T I I V V A V P E G L P L A V T I S L A Y S M K K M M R D K N F V R V L A A C |                                                                                                         |
| Volvox_carteri_6               | A V A I C C F A A L L I K W C V                                           | ----- | V N K G F P V K K I   | N Q N G P I Q F F L Y S V T I I V V A V P E G L P L A V T I S L A Y S M K K M M K D N N F V R V L A A C |                                                                                                         |
| Ostreococcus_lucimarinus_3     | G A A V L T F L A S M I R W I A                                           | ----- | D S A K S G K W       | D G T L V L E F L I N A V T I V V V A I P E G L P L A I T L G L A F A M R K M M A D Q N L V R R L E A C |                                                                                                         |
| Micromonas_sp_4                | G A A I A T F I A S M I R W I I                                           | ----- | D G S E G K G W       | D G V L I L D Y L I N S V T I V V V A I P E G L P L A I T L G L A F A M R K M M A D Q N L V R R L E A C |                                                                                                         |
| Selaginella_moellendorffii_5   | A V A I I C F S M L F I R F A T I T H N D R Y F V E D                     | ----- | Y K K D K K A V A     | V F K R N V N I L S V A T I I V V A V P E G L P L A V T L S L A F A M K K M M D K A L V R H L A A C     |                                                                                                         |
| A.thaliana_AT3G21180.1         | S V A L V V L V A L L V R Y F T G T T Q D T N G A T O F I K G T T S I S D | ----- | -----                 | I V D D C V K I F T I A V T I V V V A V P E G L P L A V T L T L A Y S M R K M M A D K A L V R R L S A C |                                                                                                         |
| Aquilegia_caerulea_5           | A V A L V V L V L L A R Y F T G H T R E P N                               | ----- | R F I K G K T N V S D | A V D G A I K I V T V A V T I V V V A V P E G L P L A V T L T L A Y S M R K M M A D K A L V R R L S A C |                                                                                                         |
| A.thaliana_AT5G57110.2         | A V A A A V L V I L L T R Y F T G H T K D N N G G P O F V K G K T K V G H | ----- | -----                 | V I D D V V K V L T V A V T I V V V A V P E G L P L A V T L T L A Y S M R K M M A D K A L V R R L S A C |                                                                                                         |
| Oryza_sativa_3                 | S V A L A V L V L L A R Y F T G H T Y N P D G S V Q Y V K G M G V G Q     | ----- | -----                 | T I R G I V G I F T V A V T I V V V A V P E G L P L A V T L T L A F S M R K M M D K A L V R R L S A C   |                                                                                                         |
| Zea_mays_2                     | S V A L A V L V L L A R Y F T G H T Y N P D G S V Q Y V K G M G V G Q     | ----- | -----                 | T I R G I V K I F T V A V T I V V V A V P E G L P L A V T L T L A F S M R K M M K D K A L V R R L S A C |                                                                                                         |
| Zea_mays_3                     | S V A G A V L V I L W L R Y F T G H T K N P D G T T O F L A G T T G V K Q | ----- | -----                 | G F M G A I R I L T I A V T I V V V A V P E G L P L A V T L T L A Y S M R K M M R D K A L V R R L S S C |                                                                                                         |
| Zea_mays_4                     | S V A G A V L V L W I R Y F T G H T E N P D G T P O F V A G T T G V K Q   | ----- | -----                 | G F M G A I R I L T I A V T I V V V A V P E G L P L A V T L T L A Y S M K K M M R D K A L V R R L S S C |                                                                                                         |
| Selaginella_moellendorffii_6   | S V A I L V F V M L C L O E H C G H S F Y C G                             | ----- | M F K L               | E L E T I T A F M C L Q V T I V V V A V P E G L P L A V T L T L A Y S M K K M M A D K A L V R H L A A C |                                                                                                         |
| Selaginella_moellendorffii_7   | S V A V V C F I V C V I R F I E M H N T D Y O G I K W                     | ----- | L M F                 | F I G R F H S Y R L L Q V T I V V V A V P E G L P L A V T L T L A Y S M K K M M T D R A L V R H L S A C |                                                                                                         |
| Aquilegia_caerulea_6           | F F A V V T F A V L V Q G L F S R K W Q D G T Y L W W                     | ----- | S G D                 | D A L A L L E F F A V A V T I V V V A V P E G L P L A V T L S L A F A M K K M M N D K A L V R H L A A C |                                                                                                         |
| Medicago_truncatula_3          | F F A I V T F A V L V Q G L V S L K L Q E N F W N W                       | ----- | N G D                 | D A L E M L E Y F A I A V T I V V V A V P E G L P L A V T L S L A F A M K K M M N D K A L V R N L A A C |                                                                                                         |
| A.thaliana_AT2G22950.1         | S F A I V T F A V L V Q G M F M R K L S L G P H W W W                     | ----- | S G D                 | D A L E L L E Y F A I A V T I V V V A V P E G L P L A V T L S L A F A M K K M M N D K A L V R H L A A C |                                                                                                         |
| A.thaliana_AT4G37640.1         | F F A V V T F A V L V Q G M F M R K L S T G T H W V W                     | ----- | S G D                 | E A L E L L E Y F A I A V T I V V V A V P E G L P L A V T L S L A F A M K K M M N D K A L V R H L A A C |                                                                                                         |
| Oryza_sativa_4                 | I F A V V T F A V L T E G L F R R K I M D A S Y L S W                     | ----- | T G D                 | D A M E L L E F F A I A V T I V V V A V P E G L P L A V T L S L A F A M K K M M N D K A L V R H L A A C |                                                                                                         |
| Zea_mays_5                     | A F A V V T F A V L T Q S L F W R K L A D G S W L S W                     | ----- | T G D                 | D A L E L L E F F A I A V T I V V V A V P E G L P L A V T L S L A F A M K K M M N D R A L V R H L A A C |                                                                                                         |
| Oryza_sativa_5                 | F F A V I T F I V L S Q G L I S K K Y H E G L L L S W                     | ----- | S G D                 | D A L E M L E H F A I A V T I V V V A V P E G L P L A V T L S L A F A M K K M M N D K A L V R H L A A C |                                                                                                         |
| A.thaliana_AT1G27770.1         | F F A V I T F A V L V Q G L A N Q R L D N S H W I W                       | ----- | T A D                 | E L M A M L E Y F A V A V T I V V V A V P E G L P L A V T L S L A F A M K K M M N D K A L V R N L A A C |                                                                                                         |
| Oryza_sativa_6                 | F F A V L T F I V L S Q G I I G Q K Y L D G L L L S W                     | ----- | S G D                 | D V L E I L D H F A V A V T I V V V A V P E G L P L A V T L S L A F A M K K M M N D K A L V R Q L A A C |                                                                                                         |
| Zea_mays_6                     | F F A L L T F V I L S Q G L V G Q K Y S D G L L L S W                     | ----- | T G E                 | D V L E I L E H F A I A V T I V V V A V P E G L P L A V T L S L A F A M K K M M S E K A L V R Q L S A C |                                                                                                         |
| Aquilegia_caerulea_7           | G F A V V T F L V L T I R F L V E K A L Q H N L S N W                     | ----- | S S V                 | D A L T L I N Y F A I S V T I I V V A V P E G L P L A V T L S L A F A M K K L M N D K A L V R H L S A C |                                                                                                         |
| Oryza_sativa_7                 | V F A V L T F L V L L A R F L A D K G M H V G L L N W                     | ----- | S A N                 | D A L T I V N Y F A I A V T I I V V A V P E G L P L A V T L S L A F A M K K L M H D K A L V R H L A A C |                                                                                                         |
| Selaginella_moellendorffii_8   | G F A V V T F L V L L L R F L I K K R                                     | ----- | F Q L V T H           | D A L E I V N F F A I A V T I I V V A V P E G L P L A V T L T L A Y A M K K M M R D K A L V R H L S A C |                                                                                                         |
| Selaginella_moellendorffii_9   | G S A V A I F V I L V T K Y V T S K S                                     | ----- | G A W                 | S M H                                                                                                   | D V M K G V Q F L S T A V T I V V V A V P E G L P L A V T L S L A F A M K K M M S E K A L V R H L A A C |
| Oryza_sativa_8                 | A V A V L V F A V L T A R H F T G S T R D E Q G N A L F D K R N V T F N A | ----- | -----                 | V F S G L V G I F Q Q A V T I I V V A I P E G L P L A V T L T L A F S M K R M R E N A L V R R L S A C   |                                                                                                         |
| Fragilariopsis_cylindrus_13    | A A A A T F I A M M C I K I F V D P                                       | ----- | E Y L R D V S         | V F K H A L D A F I I G V T I V V V A V P E G L P L A V T I S L A Y S T K K M L A D K N L I R H L A A C |                                                                                                         |
| Pseudo-nitzschia_multiseriis_4 | G A A A L T F V A M M Y I K I V V D P                                     | ----- | E Y L R D V S         | A F K H A L D A F I I G V T I V V V A V P E G L P L A V T I S L A Y S T K Q M L N D Q N L I R H L A A C |                                                                                                         |
| Phaeodactylum_tricornutum_4    | A A A A T F L A M M F I K V V L K P                                       | ----- | S Y L A H I S         | V F N Y A L E A F I I G V T I V V V A V P E G L P L A V T I S L A F S T K K M L A D K N L I R H L S A C |                                                                                                         |
| Thalassiosira_pseudonana_6     | C A A L L S L T V N C I K G F A                                           | ----- | F A K E D             | P K E F L I E Y I V V A I T V L A V S V P E G L P L A V T L A L A F S S N K M M K E Q N L V K H L D A C |                                                                                                         |
| Phaeodactylum_tricornutum_5    | I A A L V S F I G S C I I G L A                                           | ----- | I K G N               | G A E A L V D Y M V V A I T V L A V S V P E G L P L A V T L A L A F S S M K M T Q D Q N L V K H L N A C |                                                                                                         |
| Phaeodactylum_tricornutum_6    | V A A A I S F I G S C I I G F A                                           | ----- | V E G N               | K A T A I V D Y L V V A I T V L A V A V P E G L P L A V T L A L A F S S M K M T K E Q N L V K H L D A C |                                                                                                         |

|                                |                                    |                          |                   |                 |       |       |       |          |
|--------------------------------|------------------------------------|--------------------------|-------------------|-----------------|-------|-------|-------|----------|
| Skeletonema_marinoi_ABC        | ETLGCTSVICTDKTGTLLTNNEMTAVSLVLL    | EDN                      | -----             | SIVEEHAISGVSY   | ----- | P     | ----- | EGTIDGI  |
| Thalassiosira_pseudonana_1     | ETLGCTSVICTDKTGTLLTNNEMTAVSLVLL    | ESDEEGG                  | -----             | VLVAEHEVSGTSYS  | ----- | P     | ----- | IGTIKGV  |
| Thalassiosira_oceanica_1       | ETLGCTSVICTDKTGTLLTNNEMTAVSLVMI    | EN                       | -----             | YVVEEHSISGVSY   | ----- | P     | ----- | VGTVDGV  |
| Phaeodactylum_tricornutum_1    | ETLGCTSVICTDKTGTLLTNNEMTVVSLVLL    | EHDEVGE                  | -----             | VSIREFRIVEGFSYS | ----- | P     | ----- | VGEVEGI  |
| Fragilariopsis_cylindrus_1     | ETLGCVSVICSDKTGTLLTNNEMTVISLLLF    | QKNQDQKQKQNKRSKKNDKNNKND | SLSCLTEHTIDGVSYS  | -----           | ----- | P     | ----- | IGKINDL  |
| Fragilariopsis_cylindrus_2     | ETLGCVSVICSDKTGTLLTNNEMTVISLLLF    | QKNQDQKQKQNKRSKKNDKNNKND | SLSCLTEHTIDGVSYS  | -----           | ----- | P     | ----- | IGKINDL  |
| Fragilariopsis_cylindrus_3     | ETLGCVSVICSDKTGTLLTNNEMTVISLLLF    | QKNQDQKQKQNKRSKKNDKNNKND | SLSCLTEHTIDGVSYS  | -----           | ----- | P     | ----- | IGKINDL  |
| Fragilariopsis_cylindrus_4     | ETLGCVSVICSDKTGTLLTNNEMTVISLLLF    | QKNQDQKQKQNKRSKKNDKNNKND | SLSCLTEHTIDGVSYS  | -----           | ----- | P     | ----- | IGKINDL  |
| Fragilariopsis_cylindrus_5     | ETLGCVSVICSDKTGTLLTNNEMTVISLLLF    | QKNQDQKQKQNKRSKKNDKNNKND | SLSCLTEHTIDGVSYS  | -----           | ----- | P     | ----- | IGKINDL  |
| Fragilariopsis_cylindrus_6     | ETLGCVSVICSDKTGTLLTNNEMTVISLLLF    | QKNQDQKQKQNKRSKKNDKNNKND | SLSCLTEHTIDGVSYS  | -----           | ----- | P     | ----- | IGKINDL  |
| Fragilariopsis_cylindrus_7     | ETLGCVSVICSDKTGTLLTNNEMTVISLLLF    | QKNQDQKQKQNKRSKKNDKNNKND | SLSCLTEHTIDGVSYS  | -----           | ----- | P     | ----- | IGKINDL  |
| Fragilariopsis_cylindrus_8     | ETLGCVSVICSDKTGTLLTNNEMT           | -----                    | NDLSCLTEHTIDGVSYS | -----           | ----- | P     | ----- | IGKINDL  |
| Pseudo-nitzschia_multiseries_1 | ETLGCVSVICSDKTGTLLTNNEMTVKSLVLL    | EKSKT                    | -----             | NPIVEHSVEGVSYS  | ----- | P     | ----- | YGSIGGI  |
| Thalassiosira_pseudonana_2     | ETLGCTSVICTDKTGTLLTSNQMTSVSLVLL    | ETIENG                   | -----             | IELVEHEITGSSYN  | ----- | P     | ----- | FGSAVGI  |
| Ostreococcus_lucimarinus_1     | ETLGCTSVICSDKTGTLLTNNQMSAVKLITV    | RDET                     | -----             | HLTTYTVEGTTYN   | ----- | PT    | ----- | EGGVVG   |
| Zea_mays_1                     | ETLGCTTVICSDKTGTLLTNNQMSAVKLVAI    | GRWP                     | -----             | DTLRSFKVDGTTYD  | ----- | PT    | ----- | DGKIHD   |
| Oryza_sativa_1                 | ETLGCTTVICSDKTGTLLTNNQMSAVKLVAI    | GRWP                     | -----             | DTLRSFKVDGTTYD  | ----- | PS    | ----- | DGKINE   |
| Aquilegia_caerulea_1           | ETLGCTTVICSDKTGTLLTNNQMAVSKLVAL    | GTRK                     | -----             | DMIRTFRVDTTYS   | ----- | PG    | ----- | DGKIHN   |
| A.thaliana_AT1G07810.1         | ETLGCTTVICSDKTGTLLTNNQMAVSKLVAM    | GSRI                     | -----             | GTLRSFNVEGTSFD  | ----- | PR    | ----- | DGKIED   |
| A.thaliana_AT1G07670.1         | ETLGCTTVICSDKTGTLLTNNQMAVSKLVAM    | GSRI                     | -----             | GTLRSFNVEGTSFD  | ----- | PR    | ----- | DGKIED   |
| Medicago_truncatula_1          | ETLGCTTVICSDKTGTLLTNNQMAVSKLVAI    | GTNV                     | -----             | DALRAFKVEGTTYN  | ----- | PN    | ----- | DGQIEN   |
| Glycine_max_1                  | ETLGCTTVICSDKTGTLLTNNQMAVAKLVAV    | GHNV                     | -----             | DTLRAFKVEGTTYN  | ----- | PA    | ----- | DGQIEN   |
| Glycine_max_2                  | ETLGCTTVICSDKTGTLLTNNQMAVAKLVAI    | GHNV                     | -----             | DTLRAFKVEGTTYN  | ----- | PA    | ----- | DGQIEN   |
| Aquilegia_caerulea_2           | ETLGCTTVICSDKTGTLLTNNQMAVAKLVAM    | GPST                     | -----             | NAVRSFKVDGTTY   | ----- | PI    | ----- | DGKIHN   |
| Selaginella_moellendorffii_1   | ETLGCTTVICSDKTGTLLTNNQMSVMQLVGS    | GIHP                     | -----             | ADMEEFVEGTTYN   | ----- | PE    | ----- | DGGITG   |
| Physcomitella_patens_1         | ETLGCTTVICSDKTGTLLTNNQMSVTDLVLN    | GPAA                     | -----             | GVTRQFHVEGTTY   | ----- | FI    | ----- | DGKIAG   |
| Physcomitella_patens_2         | ETLGCTTVICSDKTGTLLTNNQMSVTELILN    | GPAA                     | -----             | GVTRDFHVEGTTY   | ----- | FI    | ----- | DGKIEG   |
| Physcomitella_patens_3         | ETLGCTTVICSDKTGTLLTNNQMSVTELVLN    | GAEP                     | -----             | GVTRFHVGGTSYD   | ----- | FC    | ----- | DGVIES   |
| Selaginella_moellendorffii_2   | ETLGCTTVICSDKTGTLLTNNQMSVMEFAGN    | GGSA                     | -----             | GEVREFSVEGTTYN  | ----- | PD    | ----- | DGEILG   |
| Glycine_max_3                  | ETLGCTTVICSDKTGTLLTNNQMAVTEFFTL    | GGKT                     | -----             | TASRLISVEGTTYD  | ----- | PK    | ----- | DGGILD   |
| Glycine_max_4                  | ETLGCTTVICSDKTGTLLTNNQMAVTEFFTL    | GGKT                     | -----             | TASRLIGVEGTTYD  | ----- | PK    | ----- | DGGILD   |
| Aquilegia_caerulea_3           | ETLGCTTVICSDKTGTLLTNNQMSVQFFTL     | GGKT                     | -----             | TISRIFNVEGTTYD  | ----- | PK    | ----- | DGGILD   |
| A.thaliana_AT4G00900.1         | ETLGCTTVICSDKTGTLLTNNQMSATEFFTL    | GGKT                     | -----             | TTTRVFSVSGTTYD  | ----- | PK    | ----- | DGGIVD   |
| Chlamydomonas_reinhardtii_1    | ETLGCTTVICSDKTGTLLTNNQMSAVALAAM    | GS DG                    | -----             | ASVRRWAVAGHTYC  | ----- | PD    | ----- | DGEVVG   |
| Volvox_carteri_1               | ETLGCTTVICSDKTGTLLTNNQMSAVALAFEPNG | -----                    | TSMRRWVAVAGHTYN   | -----           | ----- | PD    | ----- | EGEVEG   |
| Micromonas_pusilla_1           | ETLGCTSVICSDKTGTLLTNNMSAVKLIVP     | TIKP                     | -----             | DVLKTYDVTGTSYD  | ----- | AS    | ----- | DGAVVGA  |
| Micromonas_sp_1                | ETLGCTSVICSDKTGTLLTNNMSAVRLV       | -----                    | -----             | VQGTSYD         | ----- | PS    | ----- | DGGVVG   |
| Selaginella_moellendorffii_3   | ETLGCTTVICSDKTGTLLTNNQMSVVQLLAV    | EGP                      | -----             | DELRTFRVVTGTSYD | ----- | PD    | ----- | DGHVIG   |
| Thalassiosira_oceanica_2       | ETLGCTNVICSDKTGTLLTNNMSCEVEIVLP    | GSKA                     | -----             | EMSAHAVSGITYA   | ----- | PV    | ----- | GTIEPA   |
| Thalassiosira_pseudonana_3     | ETLGCTNVICSDKTGTLLTNNMSCEVEIVLP    | EGKN                     | -----             | EMTRFVSGITYA    | ----- | PT    | ----- | GEISPP   |
| Pseudo-nitzschia_multiseries_2 | ETLGCCTVICSDKTGTLLTNNQMVVEALVVP    | DAEE                     | -----             | GAIEEYRVGTTEYA  | ----- | PT    | ----- | DGEIQNY  |
| Fragilariopsis_cylindrus_9     | ETLGCCTVICSDKTGTLLTNNQMVVESI       | -D DYSG                  | -----             | NNIREYHITGTEYS  | ----- | PT    | ----- | DGAIQDY  |
| Fragilariopsis_cylindrus_10    | ETLGCCTVICSDKTGTLLTNNQMVVESI       | -D DYSG                  | -----             | NNIREYHITGTEYS  | ----- | PT    | ----- | DGAIQDY  |
| Aquilegia_caerulea_4           | ETLGCTTVICSDKTGTLLTNNMMSVSKICVI    | SSVNHG                   | -----             | AITAEYRVSGTTYA  | ----- | P     | ----- | EGIILDG  |
| Glycine_max_5                  | ETLGCTTVICSDKTGTLLTNNMMSVAKVCVV    | ESAKRG                   | -----             | PVVSEYSVSGTTYA  | ----- | P     | ----- | EGIIFDS  |
| Medicago_truncatula_2          | ETLGCTTVICSDKTGTLLTNNMMSVAKICIV    | ESSKSS                   | -----             | PFVTEYGVSGTTYA  | ----- | P     | ----- | EGIIFDK  |
| A.thaliana_AT1G10130.1         | ETLGCTTVICSDKTGTLLTNNMMSVSKICVV    | QSAEHG                   | -----             | PMINEFTVSGTTYA  | ----- | P     | ----- | EGTVFDS  |
| Oryza_sativa_2                 | ETLGCTTVICSDKTGTLLTNNMMSVSKICVV    | RSVHOR                   | -----             | PITDEYSISGTTFA  | ----- | P     | ----- | DGTFYDA  |
| Selaginella_moellendorffii_4   | ETLGCTTVICSDKTGTLLTNNMMSVTKICVV    | ESA                      | -----             | ATLSEFTVGTGTSYA | ----- | P     | ----- | DGVIQNA  |
| Micromonas_pusilla_2           | ETLGCTSVICSDKTGTLLTNNAMLATRVCVV    | DASEGAAGAAAARVG          | -----             | DACLAEYVGTGDGYS | ----- | P     | ----- | DGVVTEA  |
| Micromonas_sp_2                | ETLGCTSVICSDKTGTVTTNIMTITHVCAV     | NEVEAAAADDKISLA          | -----             | DCLTDYKVTGNGCA  | ----- | P     | ----- | EGDISV   |
| Volvox_carteri_2               | ETLGCTTVICSDKTGTLLTNNQMSAVGCSVV    | QSCAAGG                  | -----             | ASLMFEFVGTGTTY  | ----- | P     | ----- | EGMILGP  |
| Chlamydomonas_reinhardtii_2    | ETLGCTTVICSDKTGTLLTNNQMSAVGCAVV    | QSCAAGG                  | -----             | SALMEFSITGTTY   | ----- | P     | ----- | DGMILGP  |
| Dunaliella_salina_1            | ETLGCTTVICSDKTGTLLTNNQMSVIKVAAV    | QSSS                     | -----             | SQLAEFDVTGTTFS  | ----- | P     | ----- | EGMVLGP  |
| Ostreococcus_lucimarinus_2     | ETLGCTSVICSDKTGTLLTCNVMTVMRMCVI    | ENSST                    | -----             | AEVTNYGIRGEAYA  | ----- | Q     | ----- | NGEILDS  |
| Phaeodactylum_tricornutum_2    | ESLGCATAVASDKTGTLLTNNEMTVRTLFAV    | AYPK                     | -----             | AKFGFTGIGYG     | SK    | ----- | ----- | SGNLVYL  |
| Chlamydomonas_reinhardtii_3    | ETLGS LNVCSDKTGTLLTNNEMTVVALRTA    | -----                    | -----             | ATEYTVSGVGYE    | ----- | ----- | ----- | PGEFAML  |
| Chlamydomonas_reinhardtii_4    | ETLGS LNVCSDKTGTLLTNNEMTVVALRTA    | -----                    | -----             | ATEYTVSGVGYE    | ----- | ----- | ----- | PVGEFAML |
| Thalassiosira_pseudonana_4     | ETLGSVTVICSDKTGTLLTNNIMSLTAFVTS    | -----                    | -----             | NARYKNN         | ----- | ----- | ----- | -----    |
| Thalassiosira_pseudonana_5     | ETLGSVTVICSDKTGTLLTNNIMSLTAFVTS    | -----                    | -----             | NARYKNN         | ----- | ----- | ----- | -----    |

|                                |                                 |             |            |
|--------------------------------|---------------------------------|-------------|------------|
| Fragilariopsis_cylindrus_11    | ETLGSVTVICSDKTGTLTTNVMSTLAFVTS  | NAHYKNNVVSS | VMAVDI     |
| Fragilariopsis_cylindrus_12    | ETLGSVTVICSDKTGTLTTNVMSTLAFVTS  | NAHYKNNVVSS | VMAVDI     |
| Pseudo-nitzschia_multiseriis_3 | ETLGSVTVICSDKTGTLTTNVMSTLAFVTS  | NAHYKNNVHAS | DRTPA      |
| Phaeodactylum_tricornutum_3    | ETLGSVTVICSDKTGTLTKNEMSLIGFVTS  | NARYKIDVDSK | NRSAD      |
| Micromonas_pusilla_3           | ETLGSASIICTDKTGTLTTEGKMTLVAMHAG | GVDYTVT     | GKGFDP     |
| Micromonas_sp_3                | ETLGSASIICTDKTGTLTTEGKMTLVAMYAG | KVDYTVT     | GKGFDP     |
| Chlamydomonas_reinhardtii_5    | ETMGGATAICSDKTGTLTENRMTVVEGWFA  | GTAYP       | QVPEGS     |
| Chlamydomonas_reinhardtii_6    | ETMGGATAICSDKTGTLTENRMTVVEGWFA  | GTAYP       | QVPEAS     |
| Volvox_carteri_3               | ETMGGATAICSDKTGTLTENRMTVVEGWFA  | GTSFE       | SVPPPE     |
| Volvox_carteri_4               | ETMGGATAICSDKTGTLTENRMTVVEGWFA  | GTSFE       | SVPPPE     |
| Volvox_carteri_5               | ETMGGATAICSDKTGTLTENRMTVVEGWFG  | GKKYD       | QAPRSG     |
| Chlamydomonas_reinhardtii_7    | ETMGGATAICSDKTGTLTENRMTVVEGWV   | GRHFS       | TAPKAN     |
| Chlamydomonas_reinhardtii_8    | ETMGGATAICSDKTGTLTENRMTVVEGWFA  | GOQFD       | HLPDPS     |
| Volvox_carteri_6               | ETMGGATAICSDKTGTLTENRMTVVEGWFA  | GKSYD       | HCPQPE     |
| Ostreococcus_lucimarinus_3     | ETMGSATQLNADKTGTLTQNRMTVTACWLG  | GKVC        | EQVPPP     |
| Micromonas_sp_4                | ETMGSATQLNADKTGTLTQNRMTVTDAYLG  | GTQY        | DSVPPD     |
| Selaginella_moellendorffii_5   | ETMGSATTICSDKTGTLTLNQMTVVEYAG   | GOTRS       | FHEIR      |
| A.thaliana_AT3G21180.1         | ETMGSATTICSDKTGTLTLNQMTVVEYAG   | GSKMDV      | ADNPS      |
| Aquilegia_caerulea_5           | ETMGSATTICSDKTGTLTLNQMTVVEAYSG  | GKKLDS      | SDYSR      |
| A.thaliana_AT5G57110.2         | ETMGSATTICSDKTGTLTLNQMTVVEYAG   | GKKT        | TE         |
| Oryza_sativa_3                 | ETMGSATTICSDKTGTLTLNQMTVVEAYFG  | GKKMDP      | PDNVQ      |
| Zea_mays_2                     | ETMGSATTICSDKTGTLTLNQMTVVEAYFG  | GKKMDS      | PDNAQ      |
| Zea_mays_3                     | ETMGSATTICSDKTGTLTMNKMTVVEAYLG  | GEKMDT      | YDNAS      |
| Zea_mays_4                     | ETMGSATTICSDKTGTLTLNKMTVVEAYFA  | GTKLDP      | CDDVS      |
| Selaginella_moellendorffii_6   | ETMGSATTICSDKTGTLTLNQMTVVEQVWIG | GGSL        | AEAAN      |
| Selaginella_moellendorffii_7   | ETMGSATAICSDKTGTLTMNMMTVIRSWVC  | GKLR        | PTDLE      |
| Aquilegia_caerulea_6           | ETMGSATSICSDKTGTLTTNHMAVVKTCIC  | GKVKEMNSS   | DEVFTLCS   |
| Medicago_truncatula_3          | ETMGSATTICSDKTGTLTTNHMTVVKTCIC  | MKSKEVSN    | KTSSLCS    |
| A.thaliana_AT2G22950.1         | ETMGSATTICSDKTGTLTTNHMTVVKSCIC  | MNVQDVAS    | KSSSLQS    |
| A.thaliana_AT4G37640.1         | ETMGSATTICSDKTGTLTTNHMTVVKSCIC  | MNVQDVAN    | KGSSLQS    |
| Oryza_sativa_4                 | ETMGSATTICSDKTGTLTTNHMTVVKACIC  | GKIKDVESAS  | DTKSLFS    |
| Zea_mays_5                     | ETMGSATTICSDKTGTLTTNHMTVVKACIC  | GKVRDVNSS   | VEKTLPS    |
| Oryza_sativa_5                 | ETMGSATTICSDKTGTLTTNHMTVVKACIC  | GNIKEVNNP   | KNASDLC    |
| A.thaliana_AT1G27770.1         | ETMGSATTICSDKTGTLTTNHMTVVKACIC  | EQAKEVNGP   | DAAMKFA    |
| Oryza_sativa_6                 | ETMGSATVICSDKTGTLTTNRMTVVKACIC  | GNTIQVNNP   | QTPNMSS    |
| Zea_mays_6                     | ETMGSATVICSDKTGTLTTNRMSVTKACIC  | GNTMEVNSS   | VLSSFFS    |
| Aquilegia_caerulea_7           | ETMGSASCICTDKTGTLTNHNMVVDKVVWIS | EEINVI      | KKESGTLNRS |
| Oryza_sativa_7                 | ETMGSASCICTDKTGTLTNHNMIVDKVWIG  | DVKF        | VGDK       |
| Selaginella_moellendorffii_8   | ETMGSATCICSDKTGTLTTNHMTVVKSWIG  | GRVW        | SESRP      |
| Selaginella_moellendorffii_9   | ETMGSATCICSDKTGTLTTNQMTVIKSWIG  | DELLVA      | GRTERVP    |
| Oryza_sativa_8                 | ETMGSVTAICTDKTGTLTNQMKTVEFWVG   | ADR         | PRSA       |
| Fragilariopsis_cylindrus_13    | ETMGNATNICSDKTGTLTENRMTVVGQVFA  | NSK         | D          |
| Pseudo-nitzschia_multiseriis_4 | ETMGNATNICSDKTGTLTENRMTVVRGVFA  | DTK         | D          |
| Phaeodactylum_tricornutum_4    | ETMGNATNICSDKTGTLTENRMTVVKGIFA  | DTRC        | DD         |
| Thalassiosira_pseudonana_6     | ETMGCATTICTDKTGTLTANKMTARAIYTT  | KTDFS       | TINRVPV    |
| Phaeodactylum_tricornutum_5    | ETMGCATTICTDKTGTLTANKMTARALFAA  | EQNYV       | VNDPA      |
| Phaeodactylum_tricornutum_6    | ETMGCATTICTDKTGTLTANKMTARAVFSG  | TVNYV       | VADPA      |

|                                |       |                 |              |                      |                                                   |            |        |
|--------------------------------|-------|-----------------|--------------|----------------------|---------------------------------------------------|------------|--------|
| Skeletonema_marinoi_ABC        | EH    | SVEI            | QNNPTG       | ALADVAAVSALCNDATIVGN | DAPKAA                                            | GKT        | YE     |
| Thalassiosira_pseudonana_1     | QH    | SSEI            | ADNPKG       | SVSDVAAVASLNCDAIAAA  |                                                   | SKT        | YE     |
| Thalassiosira_oceanica_1       | EH    | ELEV            | LRNPHG       | AVADIAAVSSLNCDAIRKGN | NNPEGT                                            | VKA        | FD     |
| Phaeodactylum_tricornutum_1    | QY    | NKEV            | KEDPLG       | SVADVAAVCALCNDAKILGI | DS                                                | EKA        | FQ     |
| Fragilariopsis_cylindrus_1     | VFDK  | YDKEL           | YSSSG        | SINDVIAVASLNCDAIRIGN | NNNNDNNE                                          | ADGKNGKKNK | TORORQ |
| Fragilariopsis_cylindrus_2     | VFDK  | YDKEL           | YSSSG        | SINDVIAVASLNCDAIRIGN | NNNNDNNE                                          | ADGKNGKKNK | TORORQ |
| Fragilariopsis_cylindrus_3     | VFDK  | YDKEL           | YSSSG        | SINDVIAVASLNCDAH     |                                                   | GKNGKKNK   | TORORQ |
| Fragilariopsis_cylindrus_4     | VFDK  | YDKEL           | YSSSG        | SINDVIAVASLNCDAH     |                                                   | GKNGKKNK   | TORORQ |
| Fragilariopsis_cylindrus_5     | VFDK  | YDKEL           | YSSSG        | SINDVIAVASLNCDAIRIGN | NNNNDNNE                                          | ADGKNGKKNK | TORORQ |
| Fragilariopsis_cylindrus_6     | VFDK  | YDKEL           | YSSSG        | SINDVIAVASLNCDAIRIGN | NNNNDNNE                                          | ADGKNGKKNK | TORORQ |
| Fragilariopsis_cylindrus_7     | VFDK  | YDKEL           | YSSSG        | SINDVIAVASLNCDAIRIGN | NNNNDNNE                                          | ADGKNGKKNK | TORORQ |
| Fragilariopsis_cylindrus_8     | VFDK  | YDKEL           | YSSSG        | SINDVIAVASLNCDAIRIGN | NNNNDNNE                                          | ADGKNGKKNK | TORORQ |
| Pseudo-nitzschia_multiseries_1 | V     |                 | SDGFA        | LLSDVAAVAALCNDARIMGN | DH                                                | DGKSSN     | LHD    |
| Thalassiosira_pseudonana_2     | DR    | SETV            | RLPNG        | AVKDACDIMTLCNDARLIGN | DVLADNTEK                                         | KNSSGGST   | TQQ    |
| Ostreococcus_lucimarinus_1     |       |                 | APKKLDA      | SLRAIAKISALCNGAOLEY  | K                                                 | NDA        | YK     |
| Zea_mays_1                     |       | W               | PSLSMDE      | NLQMIKIAAIVCNDASIAH  | S                                                 | EHQ        | YV     |
| Oryza_sativa_1                 |       | W               | PSLSMDE      | NLQMIKIAAIVCNDASIAH  | S                                                 | EHQ        | YV     |
| Aquilegia_caerulea_1           |       | W               | PAGRMDA      | NLQMAKIASLNCDAKITQ   | S                                                 | GHQ        | YV     |
| A.thaliana_AT1G07810.1         |       | W               | PMGRMDA      | NLQMIKIAAICNDANVEQ   | S                                                 | DOQ        | FV     |
| A.thaliana_AT1G07670.1         |       | W               | PTGRMDA      | NLQMIKIAAICNDANVEK   | S                                                 | DOQ        | FV     |
| Medicago_truncatula_1          |       | W               | PAGQLDA      | NLQMAKIAAIVCNDAGISQ  | S                                                 | EHK        | FV     |
| Glycine_max_1                  |       | W               | PTGGLDA      | NLQMIKIAAIVCNDAGVAQ  | S                                                 | EHK        | FV     |
| Glycine_max_2                  |       | W               | PTSGGLDA     | NLQMIKIAAIVCNDAGVAQ  | S                                                 | EHK        | FV     |
| Aquilegia_caerulea_2           |       | F               | PSGRMDV      | NLQMIKIAAIVCNDAGVSO  | S                                                 | GNH        | YV     |
| Selaginella_moellendorffii_1   |       | Y               | NPGMMSK      | NLQSLAEIAAIVCNDAGIMC | K                                                 | GNQ        | FR     |
| Physcomitella_patens_1         |       | L               | RIGQLDP      | NIQSFAEIASLNCDAIGLY  | Q                                                 | GNT        | FK     |
| Physcomitella_patens_2         |       | L               | SVGQLDP      | NMLSFAEIASLNCDAIGLY  | Q                                                 | GNG        | FK     |
| Physcomitella_patens_3         |       | L               | EPGNLDR      | NLETFAEIAARCNDAIVSL  | K                                                 | NGV        | FK     |
| Selaginella_moellendorffii_2   |       | L               | PV-SMDR      | NLQTIQIAAIVCNDAAITY  | K                                                 | GGQ        | FR     |
| Glycine_max_3                  |       | W               | GCYNMDA      | NLQVMAEICAVCNDAGIYF  | D                                                 | GRL        | FR     |
| Glycine_max_4                  |       | W               | GCYNMDV      | NLQVMAEICAVCNDAGIYF  | D                                                 | GRL        | FR     |
| Aquilegia_caerulea_3           |       | W               | TCYNMDA      | NLQSMAEICAVCNDAGVFR  | K                                                 | GRL        | FQ     |
| A.thaliana_AT4G00900.1         |       | W               | GCNNMDA      | NLQAVAEICISICNDAGVYF | E                                                 | GKL        | FR     |
| Chlamydomonas_reinhardtii_1    |       | LG              | HAAALDK      | ALQTVAEVCAVCNEAHLEF  | K                                                 | GSA        | FR     |
| Volvox_carteri_1               |       | LA              | PGAALDK      | ALQTVAEVCAVCSEAQLF   | K                                                 | GSA        | FR     |
| Micromonas_pusilla_1           | PKP   | T               | KSKPLDA      | SLAAVSKVCRGCNDAVIEM  | D                                                 | HGH        | AK     |
| Micromonas_sp_1                |       | L               | VGGSLDA      | CVTAVSRVCMCNESTVEL   | K                                                 | DGA        | FR     |
| Selaginella_moellendorffii_3   |       | L               | PSELDH       | NLRTLARICALCNDAGIQF  | K                                                 | NGS        | YS     |
| Thalassiosira_oceanica_2       |       | V               | DFGKSPA      | QLGMLSSIASLNCSSGIEYD | EK                                                | GSK        | YV     |
| Thalassiosira_pseudonana_3     |       | V               | DFVKSSA      | QLSMLSSIASLNCSSIEYD  | TK                                                | GKK        | YV     |
| Pseudo-nitzschia_multiseries_2 |       |                 | TSTTG        | NLEQLANVCALCNEATIRY  | L                                                 | EGQ        | YV     |
| Fragilariopsis_cylindrus_9     | NTS   |                 | ADTSNGS      | SLEMMALVCTLCNEAIKY   | K                                                 | DGQ        | YV     |
| Fragilariopsis_cylindrus_10    | NTS   |                 | ADTSNGS      | SLEMMALVCTLCNEAIKY   | K                                                 | DGQ        | YV     |
| Aquilegia_caerulea_4           | S     | GLQL            | EFPAQCP      | CLLHIAMCSALCNESSLQYN | PD                                                | KGN        | YE     |
| Glycine_max_5                  | T     | GLQL            | DFPAQLP      | CLLHMAMCSALCNESSLQYN | PD                                                | KGN        | YE     |
| Medicago_truncatula_2          | A     | GVQL            | DTPAQLQ      | CLLHMAMCSALCNESSLQYN | PD                                                | KGK        | YE     |
| A.thaliana_AT1G10130.1         | N     | GMQL            | DLPAQSP      | CLHHLAMCSSLNCDSILQYN | PD                                                | KDS        | YE     |
| Oryza_sativa_2                 | G     | GLQL            | EFPPQSS      | CLLHIAMCSALCNESSLQYN | PD                                                | KKC        | YE     |
| Selaginella_moellendorffii_4   | N     | NQOI            | DYPAALP      | SLVQAACSSLNCDSIQYN   | AE                                                | KDI        | YE     |
| Micromonas_pusilla_2           | NS    | GKVV            | EHPAERA      | SVLHMSICASLNCDSALTYN | GK                                                | TRA        | YE     |
| Micromonas_sp_2                | LT    | EKVV            | DRPANLP      | SILHLAICSSLNCDSLSYN  | GK                                                | THS        | FD     |
| Volvox_carteri_2               | S     | GAVL            | QRPADSP      | CLLHLAMASSLNCDSALVYR | PD                                                | KGT        | YQ     |
| Chlamydomonas_reinhardtii_2    | G     | GAVL            | QRPADSP      | CLLHLAMGAALCNDALVYR  | PD                                                | KGT        | YQ     |
| Dunaliella_salina_1            | G     | GVVL            | ROPADTP      | CLAHAAQCAALCNDSSQVFA | QK                                                | TGK        | LQ     |
| Ostreococcus_lucimarinus_2     | R     | GLVV            | HEPADAA      | AVAYVAMCCMCNDSTLNFDS | KE                                                | KGS        | FE     |
| Phaeodactylum_tricornutum_2    | DADGS | TGPKAPS         | GKVTSECEYEA  | ALSALLNTACLNNATLLOS  | LDSELS                                            | EGHTGGA    |        |
| Chlamydomonas_reinhardtii_3    | VPDAA | ATDKGA          | AVANGSGTRSQP | LDGAQRT              | ALQQLKGTIVLNCNSSLVKEGPEVAISIGDDGAAADVAGAADKGGKDKG | GGGVV      | YS     |
| Chlamydomonas_reinhardtii_4    | VPDAA | ATDKGAAI        | ANGSGTRSQP   | LDGAQRT              | ALQQLKGTIVLNCNSSLVKEGPEVAISIGDDGAAADVAGAADKGGKDKG | GGKGVV     | YS     |
| Thalassiosira_pseudonana_4     |       | PEGVKPAHPDDNFPV | SNG          | ESPTKD               | WIQSALACGVLCSKCVLGE                               | GGR        | AG     |
| Thalassiosira_pseudonana_5     |       | GIKSAHPDDSF     | PKNG         | ESPSKD               | WIRSALACGVLCSKCVLGE                               | GGR        | AG     |

|                                |                      |         |              |                    |       |              |        |
|--------------------------------|----------------------|---------|--------------|--------------------|-------|--------------|--------|
| Fragilariopsis_cylindrus_11    | -----SDTNPVGQG-----  | GSPEQS  | FFRQLIGGVLC  | SKCTLGKD           | ----- | GGR          | EG     |
| Fragilariopsis_cylindrus_12    | -----SDTNPVGQG-----  | GSPEQS  | FFRQLIGGVLC  | SKCTLGKD           | ----- | GGR          | EG     |
| Pseudo-nitzschia_multiseriis_3 | -----FGEKADISKG----- | GMPDQT  | FWRQALIGGVLC | SNCKLGKN           | ----- | GTR          | EG     |
| Phaeodactylum_tricornutum_3    | -----SLPVSSG-----    | QSPTLE  | FVRNALAGGVLC | SKCTLGKF           | ----- | GGR          | DG     |
| Micromonas_pusilla_3           | NGTID                | ASNDA   | PIQATLGS     | AVLCSNTSLKLE       | ----- | TDVETG       | TSK    |
| Micromonas_sp_3                | KGDE                 | PANDAGG | VRAVLGS      | AVLCSNTTLKLE       | ----- | TDPDSG       | LAK    |
| Chlamydomonas_reinhardtii_5    | -----                | VLGPQ   | VLELLK       | WNCAMNNRAFLVD      | ----- | QE           | SGV    |
| Chlamydomonas_reinhardtii_6    | -----                | ALHPQ   | LLELLK       | WNCAMNNRAFLVD      | ----- | KD           | NV     |
| Volvox_carteri_3               | -----                | QLSPT   | LLSLLK       | YNCALNNRAFLVD      | ----- | QD           | NGT    |
| Volvox_carteri_4               | -----                | QLSPT   | LLSLLK       | YNCALNNRAFLVD      | ----- | QD           | NGT    |
| Volvox_carteri_5               | -----                | DLQPE   | LLEHLK       | MNCALNSRAFVTV      | ----- | EK           | DGK    |
| Chlamydomonas_reinhardtii_7    | -----                | ELDPE   | VCEQLK       | MNCAMNAKAFIE       | ----- | KD           | NGK    |
| Chlamydomonas_reinhardtii_8    | -----                | ELPRE   | VCDELK       | LNCALNSRAFVIEA     | ----- | -----        | GPK    |
| Volvox_carteri_6               | -----                | ELPOD   | VCDELK       | LNCALNSKAFVLDN     | ----- | -----        | GPK    |
| Ostreococcus_lucimarinus_3     | -----                | SVSET   | FSDTLC       | QSMAVNSDANLSY      | ----- | KD           | NGT    |
| Micromonas_sp_4                | -----                | DISDE   | FAALLA       | ESICVNSDANLAH      | ----- | NE           | NGT    |
| Selaginella_moellendorffii_5   | -----                | GLPDA   | VTSVIF       | DGVAHNSAGSVYYTL    | ----- | DR           | NGV    |
| A.thaliana_AT3G21180.1         | -----                | GLHPK   | LVALIS       | EGVAQNTTGNIFH      | ----- | PKD          | GGE    |
| Aquilegia_caerulea_5           | -----                | SLSPT   | AQSLLV       | EGIAQNSTGSVFT      | ----- | SE           | GGE    |
| A.thaliana_AT5G57110.2         | -----                | QLPAT   | ITSLVVE      | GISQNTTGSIFV       | ----- | PEG          | GGD    |
| Oryza_sativa_3                 | -----                | VLSAS   | ISSLIVE      | GIAQNTSGSIFE       | ----- | PEN          | GQD    |
| Zea_mays_2                     | -----                | MLSAD   | VTSLIVE      | GIAQNTSGSIFE       | ----- | PEQ          | GGQE   |
| Zea_mays_3                     | -----                | TMCTS   | VTALLIE      | GIAQNTTGTVFM       | ----- | PED          | GGA    |
| Zea_mays_4                     | -----                | QMSDS   | AASLIE       | GIAQNTTGTVFL       | ----- | PED          | GGA    |
| Selaginella_moellendorffii_6   | -----                | SVGGE   | ISKCI        | IEGIAENSSGSVVF     | ----- | PKD          | GGD    |
| Selaginella_moellendorffii_7   | -----                | NISEG   | VRKLLF       | EAICLNTNASVET      | ----- | HE           | GAP    |
| Aquilegia_caerulea_6           | -----                | EVVST   | TLKTL        | LQSFNNTGGEVVV      | ----- | NK           | NGK    |
| Medicago_truncatula_3          | -----                | ELPES   | VVLLQ        | SIFNNTGGEVVV       | ----- | NK           | QGK    |
| A.thaliana_AT2G22950.1         | -----                | DIPEA   | ALKLL        | QLIFNNTGGEVVV      | ----- | NE           | RGK    |
| A.thaliana_AT4G37640.1         | -----                | EIPES   | AVKLL        | QSFNNTGGEVVV       | ----- | NK           | HGK    |
| Oryza_sativa_4                 | -----                | ELPES   | AMTLL        | SQSFNNTGGDVVF      | ----- | NK           | SGS    |
| Zea_mays_5                     | -----                | DLPAS   | VVAML        | LSAFNNTGGDIVL      | ----- | DC           | DGR    |
| Oryza_sativa_5                 | -----                | ELPET   | VVKTL        | LESIFNNTGGEVVI     | ----- | DC           | DGK    |
| A.thaliana_AT1G27770.1         | -----                | GIPES   | AVKLL        | QSFNNTGGEIVV       | ----- | GK           | GNK    |
| Oryza_sativa_6                 | -----                | NFPEV   | AVETL        | LESIFNNTGGEVVT     | ----- | NC           | DGK    |
| Zea_mays_6                     | -----                | KVPEF   | ALQIL        | MESIFNNTAGEVVI     | ----- | NC           | DGK    |
| Aquilegia_caerulea_7           | -----                | MVSER   | VLSIL        | QSFNNTGSEVVI       | ----- | GK           | DGK    |
| Oryza_sativa_7                 | -----                | TISER   | VMAIL        | IQGFVNTASEVVK      | ----- | GD           | DGK    |
| Selaginella_moellendorffii_8   | -----                | EVCAE   | LHEL         | VLENCFQNTSGDVGD    | ----- | GE           | GKK    |
| Selaginella_moellendorffii_9   | -----                | VVSR    | SRE          | MVLEGIFQNTSGEVVCPG | ----- | EAYDPK       | TKT    |
| Oryza_sativa_8                 | -----                | AVNGG   | VVRL         | LCQAGLNTTGSVYK     | ----- | PDN          | VSP    |
| Fragilariopsis_cylindrus_13    | -----                | NISEA   | ALDVILE      | GIACCSTARVLPAA     | ----- | LPKDGEQ      | ENIDTR |
| Pseudo-nitzschia_multiseriis_4 | -----                | EISAT   | ALNI         | ILEAFACCSTARILPAA  | ----- | PIVDGE       | ENYDNR |
| Phaeodactylum_tricornutum_4    | -----                | LINKK   | ALEVILE      | GIACCSTAKVIPAA     | ----- | AAVANEHGIDDL | HLVDDR |
| Thalassiosira_pseudonana_6     | -----                | -----   | -----        | -----              | ----- | -----        | -----  |
| Phaeodactylum_tricornutum_5    | -----                | -----   | FVKNSID      | -----              | ----- | DK           | GKV    |
| Phaeodactylum_tricornutum_5    | -----                | DTLGN   | HVANHCG      | -----              | ----- | GEN          | G      |
| Phaeodactylum_tricornutum_6    | -----                | HALGD   | YVRNHQ       | -----              | ----- | DAN          | GLV    |



|                                |             |             |      |                                  |   |           |         |                 |        |
|--------------------------------|-------------|-------------|------|----------------------------------|---|-----------|---------|-----------------|--------|
| Skeletonema_marinoi_ABC        | RIGEPTEAALC | VLAE        | KI   | GGKFS                            | D |           |         |                 | SASTS  |
| Thalassiosira_pseudonana_1     | RMGEPTEAALC | VLTE        | KL   | GGKVS                            |   |           |         |                 | TESTA  |
| Thalassiosira_oceanica_1       | RIGEPTEAALC | VLAE        | KL   | GGKSK                            |   |           |         |                 | KRSSL  |
| Phaeodactylum_tricornutum_1    | RVGEPTEAALC | TLAE        | KL   | GGMSHY                           |   | LEKGR     | LD      | KKGLHFDVP       |        |
| Fragilariopsis_cylindrus_1     | RTGEPTEAALC | TLAE        | KI   | GTASSA                           |   | SASSSATSS | SASPSSG | NDSFPLKQQQQQQLQ |        |
| Fragilariopsis_cylindrus_2     | RTGEPTEAALC | TLAE        | KI   | GTASSA                           |   | SASSSATSS | SASPSSG | NDSFPLKQQQQQQLQ |        |
| Fragilariopsis_cylindrus_3     | RTGEPTEAALC | TLAE        | KI   | GTASSA                           |   | SASSSATSS | SASPSSG |                 |        |
| Fragilariopsis_cylindrus_4     | RTGEPTEAALC | TLAE        | KI   | GTASSA                           |   | SASSSATSS | SASPSSG |                 |        |
| Fragilariopsis_cylindrus_5     | RTGEPTEAALC | TLAE        | KI   | GTASSA                           |   | SASSSATSS | SASPSSG | NDSFPLKQQQQQQLQ |        |
| Fragilariopsis_cylindrus_6     | RTGEPTEAALC | TLAE        | KI   | GTASSA                           |   | SASSSATSS | SASPSSG | NDSFPLKQQQQQQLQ |        |
| Fragilariopsis_cylindrus_7     | RTGEPTEAALC | TLAE        | KI   | GTASSA                           |   | SASSSATSS | SASPSSG | NDSFPLKQQQQQQLQ |        |
| Fragilariopsis_cylindrus_8     | RTGEPTEAALC | TLAE        | KI   | GTASSA                           |   | SASSSATSS | SASPSSG | NDSFPLKQQQQQQLQ |        |
| Pseudo-nitzschia_multiseries_1 | RTGEPTEAALC | VLAE        | KL   | GALQDK                           |   | KSTED     |         | DEQQQKKP        |        |
| Thalassiosira_pseudonana_2     | IEGEPTEAALI | VLVE        | KL   | GSISAD                           |   |           |         |                 | ADES   |
| Ostreococcus_lucimarinus_1     | CVGEPTEGALK | VLCE        | KI   | GLDDMR                           |   | GVAX      |         |                 | KRSSK  |
| Zea_mays_1                     | ATGMPTFAALK | VLVE        | KM   | GLPGG                            |   |           |         |                 | YTPSL  |
| Oryza_sativa_1                 | ATGMPTFAALK | VLVE        | KM   | GLPGG                            |   |           |         |                 | YTPSL  |
| Aquilegia_caerulea_1           | SNGMPTFAALK | VLVE        | KM   | GLPEGF                           |   |           |         |                 | DRSSTA |
| A.thaliana_AT1G07810.1         | SRGMPTFAALK | VLVE        | KM   | GFPEG                            |   |           |         |                 | LNEAS  |
| A.thaliana_AT1G07670.1         | SRGMPTFAALK | VLVE        | KM   | GFPEG                            |   |           |         |                 | LNEAS  |
| Medicago_truncatula_1          | AHGMPTFAALK | ARYIFSCSLAC | VLVE | GLPEGS                           |   |           |         |                 | KNVOSG |
| Glycine_max_1                  | AHGMPTFAALK | VLVE        | KM   | GLPEGS                           |   |           |         |                 | KVAPSA |
| Glycine_max_2                  | AHGMPTFAALK | VLVE        | KM   | GLPEGS                           |   |           |         |                 | KVQSA  |
| Aquilegia_caerulea_2           | ANGMPTFAALK | VLVE        | KM   | GNDGS                            |   |           |         |                 | HHSSS  |
| Selaginella_moellendorffii_1   | ATGLPTEAALK | VLVE        | KM   | KLPHNY                           |   | NSDY      |         |                 | QNHIVD |
| Physcomitella_patens_1         | ATGMPTFAALK | VVVE        | KM   | GVPDPA                           |   | TQSIITM   | ORSS    |                 | EALAL  |
| Physcomitella_patens_2         | AIGMPTFAALK | VVVE        | KM   | GVPDFA                           |   | AQSVINN   | ORSR    |                 | EIAL   |
| Physcomitella_patens_3         | AVGMPTFAALK | VVVE        | KM   | GVPDID                           |   | AQRFIME   | ORASV   |                 | DPSAD  |
| Selaginella_moellendorffii_2   | ASGMPTFAALK | VLVE        | KI   | GLPDAK                           |   | EYCLN     | RRA     |                 |        |
| Glycine_max_3                  | ATGLPTEAALK | VLVE        | KM   | GVPDAK                           |   | ARNKIRN   | NTE     | LAA             | NNMMN  |
| Glycine_max_4                  | ATGLPTEAALK | VLVE        | KM   | GVPDAK                           |   | SRNKIRD   | NTE     | LAA             | NNMMN  |
| Aquilegia_caerulea_3           | ATGLPTEAALK | VLAE        | KM   | GVPDVK                           |   | ARNRIRD   | AQIAA   |                 | DCSID  |
| A.thaliana_AT4G00900.1         | ATGLPTEAALK | VLVE        | KM   | GIPEKK                           |   | NSENIEE   | VT      |                 | NFSDN  |
| Chlamydomonas_reinhardtii_1    | AVGAPTEAALL | VLAE        | KL   | GVADPA                           |   | ETAAARK   |         |                 | KRTAT  |
| Volvox_carteri_1               | AVGAPTEAALL | VLAE        | KL   | GLQDPR                           |   | ETAAARK   |         |                 | KRTAT  |
| Micromonas_pusilla_1           | CAGQPTGALR  | VLAS        | KLE  | RG                               |   |           |         |                 |        |
| Micromonas_sp_1                | CAGEPTEGALK | VLAE        | KI   | GVADAA                           |   | ANAKIVK   |         |                 | LRAAD  |
| Selaginella_moellendorffii_3   | ATGMPTFAAML | VLVE        | KL   | GVPDKQ                           |   | SLQKFKA   |         |                 | KRMAD  |
| Thalassiosira_oceanica_2       | RVGEPTEASLK | VLVE        | KI   | GLPDGS                           |   | EQAALLE   |         |                 | KRES   |
| Thalassiosira_pseudonana_3     | RVGEPTEASLK | VLVE        | KM   | G                                |   |           |         |                 |        |
| Pseudo-nitzschia_multiseries_2 | RVGEPTEAALK | CLVE        | KM   | GLPGQS                           |   | APSNEVE   |         |                 |        |
| Fragilariopsis_cylindrus_9     | RIGEPTEAALK | CLVE        | KM   | GLPSFT                           |   | PPSNEVE   |         |                 |        |
| Fragilariopsis_cylindrus_10    | RIGEPTEAALK | CLVE        | KM   | GLPSFT                           |   | PPSNEVE   |         |                 |        |
| Aquilegia_caerulea_4           | KIGESTEVALR | VLTE        | KV   | GLPGYD                           |   | SMPSSLN   |         |                 | MLS    |
| Glycine_max_5                  | KIGESTEVALR | VLAE        | KV   | GLPGFN                           |   | SMPSSLN   |         |                 | MLT    |
| Medicago_truncatula_2          | KIGESTEVALR | VLVE        | KV   | GLPGYN                           |   | SMPSALN   |         |                 | MLS    |
| A.thaliana_AT1G10130.1         | KIGESTEVALR | VLAE        | KV   | GLPGFD                           |   | SMPSALN   |         |                 | MLS    |
| Oryza_sativa_2                 | KIGESTEVALR | VLVE        | KV   | GLPGFD                           |   | SMPSALN   |         |                 | MLT    |
| Selaginella_moellendorffii_4   | KIGESTEVALR | VFSE        | KV   | GLPGFD                           |   | SMPTSLS   |         |                 | VLS    |
| Micromonas_pusilla_2           | KIGESTEVALR | VLTE        | KI   | GLPGFD                           |   | AMPSALT   |         |                 | RLS    |
| Micromonas_sp_2                | KIGESTEVALR | VLAE        | KI   | GLPGFD                           |   | DMPRALT   |         |                 | YLS    |
| Volvox_carteri_2               | RIGEATELALR | VFAE        | KV   | GLPASVGDHPGPLYVAG                |   | SGPAVS    |         |                 | MG     |
| Chlamydomonas_reinhardtii_2    | RIGEATELALR | VFAE        | KV   | GLPASVADHPHVYVPAGSAAAAGLGGGPAAGG |   |           |         |                 | SGRG   |
| Dunaliella_salina_1            | RIGESTEIALR | VFAE        | KI   | GLPSSV                           |   | RPDRPIS   |         |                 |        |
| Ostreococcus_lucimarinus_2     | KIGEATEIALR | VLTE        | KI   | GLPSDS                           |   | GII       |         |                 | GRA    |
| Phaeodactylum_tricornutum_2    | LSGOPTLALL  | VAAD        | KA   | NLE                              |   |           |         |                 |        |
| Chlamydomonas_reinhardtii_3    | PLGAPTEVALL | TAAE        | KA   | GLPPAA                           |   |           |         |                 |        |
| Chlamydomonas_reinhardtii_4    | PLGAPTEVALL | TAAE        | KA   | GLPPAA                           |   |           |         |                 |        |
| Thalassiosira_pseudonana_4     | EIGNPTELSII | RASY        | FA   | GV DIE                           |   |           |         |                 |        |
| Thalassiosira_pseudonana_5     | EIGNPTELSII | RASY        | FA   | GIDIE                            |   |           |         |                 |        |

|                                |              |         |             |           |
|--------------------------------|--------------|---------|-------------|-----------|
| Fragilariopsis_cylindrus_11    | EIGNPTELSIL  | RASY    | WA          | GIDVN     |
| Fragilariopsis_cylindrus_12    | EIGNPTELSIL  | RASY    | WA          | GIDVN     |
| Pseudo-nitzschia_multiseriis_3 | EIGNPTELSIL  | RATY    | WS          | GVDVN     |
| Phaeodactylum_tricornutum_3    | EIGNPTEISIL  | RASY    | FA          | DINVS     |
| Micromonas_pusilla_3           | PRGNSSEAPLV  | VAGQ    | KV          | GIKLE     |
| Micromonas_sp_3                | PRGNSSEAPLV  | VAGH    | KC          | GIKLE     |
| Chlamydomonas_reinhardtii_5    | FVGNRTECALL  | VLLR    | KL          | GFDYK     |
| Chlamydomonas_reinhardtii_6    | FVGNRTECALL  | VLLR    | KL          | GHDYV     |
| Volvox_carteri_3               | FVGNRTECALL  | VLLR    | KL          | GFDYK     |
| Volvox_carteri_4               | FVGNRTECALL  | VLLR    | KL          | GFDYK     |
| Volvox_carteri_5               | FVGNRTECALL  | LLMNRDL |             | ESDYK     |
| Chlamydomonas_reinhardtii_7    | FVGNRTECALL  | LFMNKEL |             | GSNYN     |
| Chlamydomonas_reinhardtii_8    | FVGNRTECALL  | MMIK    | TW          | GCTYT     |
| Volvox_carteri_6               | FVGNRTECALL  | MMLR    | NW          | GCDYA     |
| Ostreococcus_lucimarinus_3     | HLGSKTECALL  | QLVE    | QMOP        | PTDDTQTYI |
| Micromonas_sp_4                | HIGSKTECALL  | QLVE    | DLRSAGKGNLP | ESSNFAYV  |
| Selaginella_moellendorffii_5   | VAGSPTEKAIL  | SWGL    | QL          | GMDYS     |
| A.thaliana_AT3G21180.1         | ISGSPTEKAIL  | SWAY    | KL          | GMKFD     |
| Aquilegia_caerulea_5           | ISGSPTEKAIL  | SWGV    | KL          | GMKFE     |
| A.thaliana_AT5G57110.2         | YSGSPTEKAIL  | GWGV    | KL          | GMNFE     |
| Oryza_sativa_3                 | VTGSPTEKAIL  | SWGL    | KL          | GMRFN     |
| Zea_mays_2                     | VTGSPTEKAIL  | SWGL    | KL          | GKFS      |
| Zea_mays_3                     | ITGSPTEKAIL  | SWGL    | MI          | GMDFK     |
| Zea_mays_4                     | LTGSPTEKAIL  | SWGL    | KI          | GMDFD     |
| Selaginella_moellendorffii_6   | VTGSPTEKAIL  | GWGL    | KA          | GMNFE     |
| Selaginella_moellendorffii_7   | ITGTPTEVAVL  | GWGV    | KL          | GANFD     |
| Aquilegia_caerulea_6           | ILGTPTEETALL | EFGL    | SL          | GGDFK     |
| Medicago_truncatula_3          | ILGTPTEETAIL | EFGL    | SL          | GGDFQ     |
| A.thaliana_AT2G22950.1         | ILGTPTEETAIL | ELGL    | SL          | GGKFK     |
| A.thaliana_AT4G37640.1         | LLGTPTEETAIL | ELGL    | SL          | GGKFK     |
| Oryza_sativa_4                 | ILGTPTEETAIL | EFGL    | SL          | GGDFL     |
| Zea_mays_5                     | ILGTPTEAAIL  | EFGL    | SL          | GGDFA     |
| Oryza_sativa_5                 | ILGTPTEETALL | EFAL    | SL          | GGNFK     |
| A.thaliana_AT1G27770.1         | ILGTPTEETALL | EFGL    | SL          | GGDFQ     |
| Oryza_sativa_6                 | ILGTPTEETALL | EFAL    | LL          | DGDCK     |
| Zea_mays_6                     | ILGTPTEAAIL  | DFAL    | TI          | GGDFK     |
| Aquilegia_caerulea_7           | ILGTPTESALL  | EFGL    | LW          | GGDFG     |
| Oryza_sativa_7                 | ILGLATEETALL | EFGL    | SL          | EEHLY     |
| Selaginella_moellendorffii_8   | LIGTPTEETAVL | SFGI    | SL          | GGNFK     |
| Selaginella_moellendorffii_9   | VIGTPTEETALL | QFGL    | DL          | AGNWQG    |
| Oryza_sativa_8                 | ITGSPTEKAIL  | SWAVEEL |             | PMDAD     |
| Fragilariopsis_cylindrus_13    | LIGSKTEAAMI  | LLSQ    | SE          | WGNDD     |
| Pseudo-nitzschia_multiseriis_4 | VIGSKTEGAMI  | LLSQ    | SE          | WGNHDD    |
| Phaeodactylum_tricornutum_4    | IIGNKTEAALL  | ILAR    | SS          | WTPHDD    |
| Thalassiosira_pseudonana_6     | STGNPTEVALI  | VLAA    | DL          | GKDYR     |
| Phaeodactylum_tricornutum_5    |              | D       | DN          | VRQSH     |
| Phaeodactylum_tricornutum_6    | SCGNPTEVALI  | HLCH    | DL          | GSNVE     |



|                                |              |                            |       |           |    |
|--------------------------------|--------------|----------------------------|-------|-----------|----|
| Fragilariopsis_cylindrus_11    | AVKDAC       | PIIAEVPFSSEYKFMATVH        | ESN   | LDND      | G  |
| Fragilariopsis_cylindrus_12    | AVKDAC       | PIIAEVPFSSEYKFMATVH        | ESN   | LDND      | G  |
| Pseudo-nitzschia_multiseriis_3 | EVKEAC       | PIIAEVPFSSEYKFMATVH        | ESS   | PEND      | G  |
| Phaeodactylum_tricornutum_3    | GMKEEA       | PIVAEPFSSSEYKFMATVH        | EPR   | VEND      | G  |
| Micromonas_pusilla_3           | DLEDAL       | ERTAEIPFSSSRKMMVTVT        | KTVKQ | TPLAHVAKI | G  |
| Micromonas_sp_3                | DLEASL       | TRVYEIPFSSSRKMMVTIT        | KTTGA | TSLSHVAAS | G  |
| Chlamydomonas_reinhardtii_5    | QLREER       | EADQIKLYGFSSARKMASVLL      | RER   | AAG       | G  |
| Chlamydomonas_reinhardtii_6    | QLREQR       | EADQVKLYGFSSARKMASVLL      | RE    | PSS       | G  |
| Volvox_carteri_3               | QIREER       | EODQIKMYGFSSARKMASVLV      | R     | EPS       | G  |
| Volvox_carteri_4               | QIREER       | EODQIKMYGFSSARKMASVLV      | R     | EPS       | G  |
| Volvox_carteri_5               | AYRTOH       | ERSVEKIYGFSSARKMASVLV      | R     | LGD       | G  |
| Chlamydomonas_reinhardtii_7    | DYRHKY       | DKAVVKLYGFSSAKKMASVLI      | Q     | LPD       | G  |
| Chlamydomonas_reinhardtii_8    | AVREFY       | EASVYKMGFSSSKKMASCSV       | K     | FAD       | G  |
| Volvox_carteri_6               | SVRDEY       | DASVFKVGFSSSTKKMASATI      | K     | FAD       | G  |
| Ostreococcus_lucimarinus_3     | KLREKF       | PVAQLYHFTSARKRMSTAI        | S     | NGS       | G  |
| Micromonas_sp_4                | AGREKH       | DVAQRYHFTSARKRMSTAV        | P     | MN        | G  |
| Selaginella_moellendorffii_5   | TVRAAS       | SIIAVEPFNSTKKMAGVAI        | K     | RNN       | G  |
| A.thaliana_AT3G21180.1         | TIRSES       | AIIHAFPFNSEKKRGGVAV        | L     | RGD       | S  |
| Aquilegia_caerulea_5           | VVRSEA       | SILHVFPFNSEKKRGGVAV        | K     | LPN       | N  |
| A.thaliana_AT5G57110.2         | TARSOS       | SILHAFPFNSEKKRGGVAV        | K     | TAD       | G  |
| Oryza_sativa_3                 | DTRTKS       | SILHVFPFNSEKKRGGVAV        | H     | LGGSES    | G  |
| Zea_mays_2                     | ETRSKS       | SILHVFPFNSEKKRGGVAV        | Y     | LAG       | S  |
| Zea_mays_3                     | DVRSKS       | SVLHVVPFNSEKKRGGVAL        | Q     | VSD       | T  |
| Zea_mays_4                     | DVRTKS       | SVIHVFPFNSEKKRGGVAV        | Q     | LDD       | G  |
| Selaginella_moellendorffii_6   | EVRSNN       | TVMHVETFNSTKKRAGVAF        | K     | RKD       | G  |
| Selaginella_moellendorffii_7   | RVKESA       | TVTEVDAFNSTKKRMAVIA        | K     | TED       | G  |
| Aquilegia_caerulea_6           | AERESA       | KLVKVEPFNSEKKRGGVAV        | E     | LPE       | G  |
| Medicago_truncatula_3          | GERQAC       | KLVKVEPFNSTKKRGGVAV        | E     | LPS       | G  |
| A.thaliana_AT2G22950.1         | EERQSN       | KVIKVEPFNSTKKRGGVVI        | E     | LPEG      | G  |
| A.thaliana_AT4G37640.1         | EERKSY       | KVIKVEPFNSTKKRGGVVI        | E     | LPEG      | G  |
| Oryza_sativa_4                 | AVRKAS       | TLVKVEPFNSAKKRMGVVI        | Q     | LPG       | G  |
| Zea_mays_5                     | AVRKAS       | TLLKVEPFNSAKKRMGVVI        | Q     | LPG       | G  |
| Oryza_sativa_5                 | AKRDET       | KIVKMEPFNSTKKRMCVVL        | K     | LPG       | G  |
| A.thaliana_AT1G27770.1         | EVROAS       | NVVKVEPFNSTKKRGGVVI        | E     | LPE       | R  |
| Oryza_sativa_6                 | EKQLGS       | KIVKVEPFNSTKKRGGVVI        | E     | LPG       | G  |
| Zea_mays_6                     | EKRQET       | KIVKVEPFNSTKKRGGVVI        | E     | LPG       | G  |
| Aquilegia_caerulea_7           | SQRQES       | KIVKVEPFNSDKKRMGVVL        | S     | LST       | G  |
| Oryza_sativa_7                 | DDYNKL       | TRIKVDPFNSTKKRGGVVI        | Q     | LPN       | G  |
| Selaginella_moellendorffii_8   | DVRSQS       | SILKVEPFNSAKKRMGVVL        | K     | GGH       | G  |
| Selaginella_moellendorffii_9   | VSEVRSRS     | RVIRVEPFNSVKKMMGVVL        | A     | VNG       | GG |
| Oryza_sativa_8                 | ALKRKC       | KVVVVEAFNSDKKRSVGL         | RD    | AAT       | G  |
| Fragilariopsis_cylindrus_13    | TDKRREA      | ESGSRLPFSSSRKRMVTLV        | K     | KGG       | N  |
| Pseudo-nitzschia_multiseriis_4 | TDMRREA      | EGGSRLPFSSSRKRMVTLV        | K     | KGG       | D  |
| Phaeodactylum_tricornutum_4    | TDQRRVD      | EGGSRLPFSSSRKCMVTFV        | T     | KDE       | A  |
| Thalassiosira_pseudonana_6     | DIRDSTRGRSDK | GELAEYLVEGKQIGFSSARKMMSWAV | P     | SEG       | G  |
| Phaeodactylum_tricornutum_5    | RIRASTKGRSDQ | ASLAEFFSEGKRFDFSSARKMMSWAI | P     | Y         | E  |
| Phaeodactylum_tricornutum_6    | NIRNRTGRSDQ  | SLGAFLCQKQYGFSSARKMMSWAV   | P     | LAD       | G  |

|                                |                    |                |           |                 |              |               |             |           |               |           |
|--------------------------------|--------------------|----------------|-----------|-----------------|--------------|---------------|-------------|-----------|---------------|-----------|
| Skeletonema_marinoi_ABC        | -----GNRLLVKGA     | PNMLLERCTHAKL  | RDGKI     | -----VKLDGKLRRO | IEQKTFE      | -----LA       | TRPLRCLALAV | KETNOLE   | OSLRHYSOE     | -----     |
| Thalassiosira_pseudonana_1     | -----GNRLLVKGA     | PNMLLERCTHAKC  | RDGTV     | -----VKLDGKLRRO | IEQKTFE      | -----LA       | TRPLRCLALAI | KETDHL    | EE            | -----     |
| Thalassiosira_oceanica_1       | -----GNRLLVKGA     | PNLLPRCTHAKM   | RDGSV     | -----VKLDGKLRRO | IEQKTFSD     | -----LA       | SRPLRCLGLAV | KESANLE   | OSLRTYSOE     | -----     |
| Phaeodactylum_tricornutum_1    | -----AGNRLLLKGA    | PNLLIERCTNVKF  | RDGTI     | -----APMTGALRRS | IEDQVSK      | -----MA       | ARPLRCLALAI | KDQDEL    | DDSLKSFEPD    | -----     |
| Fragilariopsis_cylindrus_1     | -----PCNRLLVKGA    | ANMVVDRCTHIKY  | RDGSI     | -----GRMTNVLKKE | IDSKITD      | -----MA       | TRPLRCLALAI | KEESQL    | PKSLKNFOSN    | -----     |
| Fragilariopsis_cylindrus_2     | -----PCNRLLVKGA    | ANMVVDRCTHIKY  | RDGSI     | -----GRMTNVLKKE | IDSKITD      | -----MA       | TRPLRCLALAI | KEESQL    | PKSLKNFOSN    | -----     |
| Fragilariopsis_cylindrus_3     | -----PCNRLLVKGA    | ANMVVDRCTHIKY  | RDGSI     | -----GRMTNVLKKE | IDSKITD      | -----MA       | TRPLRCLALAI | KEESQL    | PKSLKNFOSN    | -----     |
| Fragilariopsis_cylindrus_4     | -----PCNRLLVKGA    | ANMVVDRCTHIKY  | RDGSI     | -----GRMTNVLKKE | IDSKITD      | -----MA       | TRPLRCLALAI | KEESQL    | PKSLKNFOSN    | -----     |
| Fragilariopsis_cylindrus_5     | -----PCNRLLVKGA    | ANMVVDRCTHIKY  | RDGSI     | -----GRMTNVLKKE | IDSKITD      | -----MA       | TRPLRCLALAI | KEESQL    | PKSLKNFOSN    | -----     |
| Fragilariopsis_cylindrus_6     | -----PCNRLLVKGA    | ANMVVDRCTHIKY  | RDGSI     | -----GRMTNVLKKE | IDSKITD      | -----MA       | TRPLRCLALAI | KEESQL    | PKSLKNFOSN    | -----     |
| Fragilariopsis_cylindrus_7     | -----PCNRLLVKGA    | ANMVVDRCTHIKY  | RDGSI     | -----GRMTNVLKKE | IDSKITD      | -----MA       | TRPLRCLALAI | KEESQL    | PKSLKNFOSN    | -----     |
| Fragilariopsis_cylindrus_8     | -----PCNRLLVKGA    | ANMVVDRCTHIKY  | RDGSI     | -----GRMTNVLKKE | IDSKITD      | -----MA       | TRPLRCLALAI | KEESQL    | PKSLKNFOSN    | -----     |
| Pseudo-nitzschia_multiseries_1 | -----AHNRLLVKGA    | ANMVLDRCTHVKY  | RDGSV     | -----AKISGSLRRE | LEKKITD      | -----MA       | TRPLRCLALAV | KDES      | SKLOSSLRHFQPR | -----     |
| Thalassiosira_pseudonana_2     | -----ONKFLFKVGA    | PSMLLRCSHAKL   | RDGKV     | -----VPLTPQLRSQ | IEDEISS      | -----IG       | DRALRCLSLAF | KDDSLAP   | QLO           | -----     |
| Ostreococcus_lucimarinus_1     | -----RGSANELLVKGA  | PEVLLERCAFVOM  | PDGAT     | -----APLSATMRN  | VILNEQAT     | -----MA       | RDALRCLAF   | AKKV      | SLGDLSSYDGS   | -----     |
| Zea_mays_1                     | -----KNLLLVKGA     | VENLLERCTHIQL  | LDGSV     | -----VLLDDGAKAL | LILSTLRD     | -----MS       | ASALRCLGF   | FAYKD     | ELSEFATYDG    | -----     |
| Oryza_sativa_1                 | -----KNLLLVKGA     | VENLLERSGYIQL  | LDGSV     | -----VLLDEGAKAL | LILSTLRE     | -----MS       | ASALRCLGF   | FAYKE     | DLAEFATYDG    | -----     |
| Aquilegia_caerulea_1           | -----RNSLLVKGA     | VENLLERSKYIQL  | LDGSV     | -----ISLDPNCRE  | LILQALHE     | -----MS       | STALRCLGF   | FAYKD     | DLAEFATYDGD   | -----     |
| A.thaliana_AT1G07810.1         | -----NKLLLVKGA     | VENLERSSTHIQL  | LDGSK     | -----RELDQYSRD  | LILQSLRD     | -----MS       | LSALRCLGF   | FAYSD     | VP            | SDFATYDGS |
| A.thaliana_AT1G07670.1         | -----NKLLLVKGA     | VENLERSSTHIQL  | LDGST     | -----RELDQYSRD  | LILQSLHD     | -----MS       | LSALRCLGF   | FAYS      | VP            | SDFATYDGS |
| Medicago_truncatula_1          | -----KKSLLLVKGA    | VENLDRSSKVQL   | RDGSV     | -----VKLDNNAK   | NLILQALHE    | -----MS       | TSALRCLGF   | FAYKD     | ELTNFENYNGN   | -----     |
| Glycine_max_1                  | -----KRSLLVKGA     | VENLDRSSKIQL   | RDGSI     | -----VNLDDNARN  | LVLQALHE     | -----MS       | TSALRCLGF   | FAYKD     | ELPKFENYSGN   | -----     |
| Glycine_max_2                  | -----KRSLLVKGA     | VENLDRSSKIQL   | RDGSI     | -----VNLDDNARN  | LVLQALHE     | -----MS       | TSALRCLGF   | FAYKD     | ELPKFENYSGN   | -----     |
| Aquilegia_caerulea_2           | -----RNSLLLVKGA    | VENLERSSTFLOL  | LDGSI     | -----VELDQNSR   | KLILQSLHE    | -----MS       | TTALRCLGF   | FAYKD     | NLSEFATYDGD   | -----     |
| Selaginella_moellendorffii_1   | -----KNRLLLVKGA    | VENLLERSSYLOL  | KDGTI     | -----VSLDSNSR   | DAWIKKLD     | -----MS       | SKALRCLGF   | FAYKD     | NL            | GDFSSYNG  |
| Physcomitella_patens_1         | -----VNRLLVKGA     | VENILERSTRVQL  | SDGSV     | -----VKMTQOSAR  | DDLAKLDS     | -----LS       | AKALRCLGL   | LAYKD     | DLQDLG        | YDYG      |
| Physcomitella_patens_2         | -----VNRLLVKGA     | VENILERSTRVQL  | LDGSV     | -----ANMTEGAR   | DALLGKLN     | -----LS       | ARALRCLGL   | LAYKD     | DLQELSD       | YDYG      |
| Physcomitella_patens_3         | -----TNKLLLVKGA    | VENLERSSTHVQL  | LDGTIV    | -----KEMTEEAR   | KLILSKIYS    | -----MS       | TKLRLCLGL   | LAYTD     | DLGDLSD       | YDYG      |
| Selaginella_moellendorffii_2   | -----QSTLLLVKGA    | VENLERSCFMQL   | MDGTIV    | -----VELDNASRA  | AILSKLNT     | -----MS       | SKALRCLGL   | LAYKD     | DLGELST       | YDYG      |
| Glycine_max_3                  | -----QNRLLVKGA     | VESLLERSSHVQL  | ADGSL     | -----VPIDDQC    | RELLRLQ      | -----MS       | SKGLRCLGF   | FAYND     | ELGEFSD       | YYA       |
| Glycine_max_4                  | -----FNRLLVKGA     | VESLLERSSHVQL  | ADGSV     | -----VPIDDQC    | RELLRLQ      | -----MS       | SKGLRCLGF   | FAYND     | DLGEFSD       | YYA       |
| Aquilegia_caerulea_3           | -----FNRLLVKGA     | VESLLERSLHVQL  | ADGSI     | -----APMDEPCR   | QLLHRHME     | -----MS       | SKGLRCLAL   | LAYKD     | ELGEFSD       | YYS       |
| A.thaliana_AT4G00900.1         | -----QNRLLVKGA     | ESILERSSFAQL   | ADGSI     | -----VALDESSR   | EVIKKHSE     | -----MT       | SKGLRCLGL   | LAYKD     | ELGEFSD       | YSS       |
| Chlamydomonas_reinhardtii_1    | -----RNALLVKGA     | AECVIDRCNRMLL  | PDGRV     | -----VPLTPVARA  | AVLGAVKD     | -----MA       | RDALRCLAL   | AVKP      | DPPAPLS       | DWDGSD    |
| Volvox_carteri_1               | -----KNSLLVKGA     | AECVIERSTRMML  | PDGRI     | -----VPLTDAARA  | AVLGAVQG     | -----MA       | RDALRCLAI   | AVKP      | DVPSPLA       | EYNGD     |
| Micromonas_pusilla_1           | -----ANANANELLVKGA | PEHVLERCAFVQL  | PNGDV     | -----VPLTKAARA  | AVVKRAET     | -----MS       | ADALRCLAL   | ATKSGASL  | GALAS         | YDGA      |
| Micromonas_sp_1                | -----SNKNSLLVKGA   | PECVLDRCSKVLL  | PDGSV     | -----TTLSPALRE  | EIVATVAE     | -----MS       | SSALRCLGF   | FALKTGAEL | GKLG          | YDGG      |
| Selaginella_moellendorffii_3   | -----NSLLLVKGA     | AEFVLERCTSVQL  | KDGSV     | -----VPLTPSFRE  | NIISCINA     | -----MT       | SKGLRVLAL   | ASKS      | DLGPLSD       | YTG       |
| Thalassiosira_oceanica_2       | -----TNQLLVKGA     | PEGLLARCTHIMQ  | ANGKV     | -----VKLDKASAD  | AVSAQQOR     | -----MS       | GRALRVLAL   | LAYKD     | LSGDLGS       | YDGT      |
| Thalassiosira_pseudonana_3     | -----TNQLLVKGA     | PEGLLISRCNKIML | GNKGV     | -----VSLDKDGN   | AVNAILNQOR   | -----MA       | GRALRVLAL   | LAYKD     | LSGDLGS       | YDGT      |
| Pseudo-nitzschia_multiseries_2 | -----DRALFVKGA     | AELLNRCTSIMR   | PDGSV     | -----QALSAKDR   | VAFARITD     | -----MS       | KRPLRVLG    | MAIKT     | NVP           | -----     |
| Fragilariopsis_cylindrus_9     | -----KRTLFLVKGA    | AELLQRCTTIMR   | PNGEV     | -----VKLTSIERN  | ALAKQITT     | -----MS       | QRPLRVLG    | MAIKC     | NMN           | -----     |
| Fragilariopsis_cylindrus_10    | -----KRTLFLVKGA    | AELLQRCTTIMR   | PNGEV     | -----VKLTSIERN  | ALAKQITT     | -----MS       | QRPLRVLG    | MAIKC     | NMN           | -----     |
| Aquilegia_caerulea_4           | -----QEIVFSKGA     | PESIIISRCTN    | ILCNDGCT  | -----APLTAADIRA | EALMARFHS    | -----FAGKDTLR | CLALALKE    | -----MPFG | QOOLAF        | -----     |
| Glycine_max_5                  | -----MHVLFKGA      | PESIIISRCTS    | ILCNDGSI  | -----VSLTADIRA  | EALSRFHS     | -----FAGKETLR | CLALALKW    | -----MPST | QOOLSF        | -----     |
| Medicago_truncatula_2          | -----LHVLFKGA      | PESIIISKCTT    | ILCNDGGSV | -----MPLTADIRA  | EALSKFNS     | -----FAGKETLR | CLALALKW    | -----MPSD | QOOLSF        | -----     |
| A.thaliana_AT1G10130.1         | -----MDVMFSKGA     | PESIIARCNK     | ILCNDGGSV | -----VPLTAAGRA  | EALSRFYS     | -----FGDETLR  | CLALAFKT    | -----VPHG | QOOLSY        | -----     |
| Oryza_sativa_2                 | -----OEIMFSKGA     | PESVIMARCTH    | ILCNDGSS  | -----VPLTMDIR   | NELEAFQS     | -----FAGKDTLR | CLALALKR    | -----MPEG | QOOLSY        | -----     |
| Selaginella_moellendorffii_4   | -----RTVLLSKGA     | PEVILQRSSYVVC  | NDGGSV    | -----TKLSPELKL  | SLEEFHRQDLI  | SLDAF         | FASQETLR    | CLALAYKD  | VPTG          | QOOLTE    |
| Micromonas_pusilla_2           | -----QSILFTKGA     | AETVLAKCTOAL   | TNASGAA   | -----EPLTDAMRA  | ALSKLQK      | -----FA       | ASSLRLAL    | AMRP      | TPPK          | TTKVSV    |
| Micromonas_sp_2                | -----QSILFTKGS     | PEAVLLRCTRVLT  | NSKGI     | -----EPISITQVR  | DALTEKYRT    | -----YA       | RRSLRVLAL   | AMRP      | ISSD          | QCHTSP    |
| Volvox_carteri_2               | -----RSVLWSKGA     | PESILARCSSV    | LANNGEV   | -----VPLTDAARA  | ALASVVKR     | -----YG       | RRALRTLAL   | AYKP      | MPSG          | TKLSP     |
| Chlamydomonas_reinhardtii_2    | -----RSIMWSKGA     | PESILARCTSVL   | LANNGEV   | -----VPLTDAARA  | ALAAATRR     | -----FG       | HRALRTLAL   | AYKP      | LP            | GGSKALSP  |
| Dunaliella_salina_1            | -----QHNIWSKGA     | PEFVLKCSHVL    | LANNGEA   | -----VPLTDSMRO  | AILSDMOA     | -----FGSRQALR | CLALAFKS    | -----VPT  | TSTTKLGY      | -----     |
| Ostreococcus_lucimarinus_2     | -----ESILFVKGA     | PESVLSICTSVMS  | NRNGRA    | -----ERMTDQVRE  | QVAEQMRG     | -----YA       | NDALRVLAL   | AMRP      | MGRG          | VTTTCE    |
| Phaeodactylum_tricornutum_2    | -----SFLYVKG       | MEKILGECSTYGO  | SNGSA     | -----ELLVEDDRA  | AEVLLQARR    | -----MA       | AGGLRVLAF   | AYGO      | -----         | -----     |
| Chlamydomonas_reinhardtii_3    | -----GGSSELIMYKGA  | PDRLPLCNSQV    | VDNDL     | -----SRTAALDP   | PGFWKAQAA    | -----LS       | SRGLRVLAL   | CRTV      | LP            | PEDTDL    |
| Chlamydomonas_reinhardtii_4    | -----GGSSELIMYKGA  | PDRLPLCNSQV    | VDNDL     | -----SRTAALDP   | PGFWKAQAA    | -----LS       | SRGLRVLAL   | CRTV      | LP            | PEDTDL    |
| Thalassiosira_pseudonana_4     | -----P-DGKYTCFVKGA | PDRLMLCKYQA    | KGGVAGE   | -----ENLEEI     | IDEAYWIEQIAV | -----LS       | SHGLRVLGL   | CRAY      | IDK           | SSVQAGAQ  |
| Thalassiosira_pseudonana_5     | -----P-EGKYTAFVKGA | PDRLMLCKYQA    | KGGATGD   | -----DNYEDI     | IDEAYWIEQIAI | -----LS       | SHGLRVLGL   | -----     | FGAQ          | -----     |

```

Fragilariopsis_cylindrus_11  --PGLEDKLIIHVKGAPDRMVKLCNTQA--VAGELG---KTEPINAEFWQEQIAI-----LS-SHGLRVLALLRGT---LEKGSVTPGDS-----
Fragilariopsis_cylindrus_12  --PGLEDKLIIHVKGAPDRMVKLCNTQA--VAGELG---KTEPINAEFWQEQIAI-----LS-SHGLRVLALLRGT---LEKGSVTPGDS-----
Pseudo-nitzschia_multiseries_3  --PGLENKNIIHVKGAPDRMVKLCNTQA--VAGQLG---KTEPINADFWEQEQIAI-----LS-SHGLRVLALLRGT---VEKGSVKQGDA-----
Phaeodactylum_tricornutum_3  --AGNDGSLVVHVKGAPDRMVKLCSTQA--KAGLLGE--GNKEPINMGFWTEQEQIAI-----LS-SHGLRVLALCRGS--E-----
Micromonas_pusilla_3         -----EQTAHVKGAPNYIMEKCTKYIT--ADGSV---KPLDDAVKKKIMSTVDD-----LS-EQALRVLAVATKN---VGGKLPF---DSEQ-----
Micromonas_sp_3              -----EHTAHVKGAPNYIMEKCTSYMA--ADGSI---VDFDEAAKAFTAKVDE-----LS-SQALRVLAIAATKD---LGAKLPY---GEEE-----
Chlamydomonas_reinhardtii_5  -----NLRLYNKGAAEWVLRRCVGLAR--PDGST---EPMTPAKLEEMNALVTG-----MA-KRGLRCICLSYRD---YAGSDP-----
Chlamydomonas_reinhardtii_6  -----NLRLYNKGAAEWVLRRCSSLMR--PDGST---EPMTEARLAEMIELVTS-----MA-KRGLRCICLSYRD---YAGSDP-----
Volvox_carteri_3             -----NLRLYNKGAAEWVLRRCSAMLO--PDGST---IPMDKVILEEMNSLVTA-----MA-MRGLRCICLSYRD---YPANDL-----
Volvox_carteri_4             -----NLRLYNKGAAEWVLRRCSAMLO--PDGST---IPMDKVILEEMNSLVTA-----MA-MRGLRCICLSYRD---YPANDL-----
Volvox_carteri_5             -----KYRLYNKGAAEWVLKRCSRCIT--QAGVV---E-MTPALRGQLLDEVTA-----MA-KRGLRCICLTYAD---FALVDP-----
Chlamydomonas_reinhardtii_7  -----KLRLYNKGAAEWVLKRCIRCHT--EAGIV---E-MTPALRGKLLDEVTN-----MA-KRGLRCICLSYTD---YPISDP-----
Chlamydomonas_reinhardtii_8  -----KFRHYNKGAAEWVLKRCTSMYN--GSQIV---Q-MGDAEREKLFVVTG-----MA-KRGLRCICLTYTD---YPLVDD-----
Volvox_carteri_6             -----KFRHYNKGAAEWVLKRCTSMYD--GARVI---E-MTEVERARLMEVVTG-----MA-KRGLRCICLTYTD---YPLVDD-----
Ostreococcus_lucimarinus_3  -----GTRLHVKGASEIVVKLCTKMMG--ADGKV---SSLTTPMLKEAFAAIEA-----FA-RQGLRTLCIAYTD---LGKSPS-----
Micromonas_sp_4              -----GGVRLHVKGASEIVVKLCTKMMK--TDGSV---EDFSPEDLAAAEKAITA-----MA-STGLRTLCIAYVD---LDTAPS-----
Selaginella_moellendorffii_5  -----TLCALYKGAAEIILDLCTKWMG--GEGTE---KVLSETMVEINGTLTH-----MA-ASSLRCLAFAIKT---YN-----
A.thaliana_AT3G21180.1       -----EVFIHWKGAAEIVLACCTQYMD--SNGTL---QSIESQK--EFFRVAIDS-----MA-KNSLRCVAIACRT---QELNOV-----
Aquilegia_caerulea_5        -----EVHIHWKGAAEIVLACSSFLD--ADGAV---KPLDEDKVAYHKKAIGD-----MA-EGSLRCVALAYRL---FDINKV-----
A.thaliana_AT5G57110.2      -----EVHVHWKGAAEIVLACSRSYD--EDGNV---APMTDDKASFFKNGIND-----MA-GRTLRCVALAFRT---YEAEKV-----
Oryza_sativa_3              -----EVHIHWKGAAEIVLDSCKSWLA--ADGSK---HSMTPEKVAEFKKFIED-----MA-ASSLRCVAFAYRT---YEMDV-----
Zea_mays_2                   -----EVHIHWKGAAEIVLDSCTSWVD--TGGSK---HSMTPEKVAEFKKFIED-----MA-AASLRCVAFAYRT---HEMDDV-----
Zea_mays_3                   -----EVHIHWKGAAEIVLLLSACRSWLS--TDGSI---QQMNSIKHNEFKERIDD-----MA-MSSLRCVAFAYCP---WEPKMV-----
Zea_mays_4                   -----VHIHWKGAAEIVLSSCKSWLS--VDGSV---QSMSAEKHDFKRSIED-----MG-ANSLRCVAFAYCS---FDIEKI-----
Selaginella_moellendorffii_6  -----NAYVHWKGAAEIVLDLCTKWMG--DGSE---NQLSETKKVEIQNGIAIGD-----MA-SRSLRCVALAYRP---ISANQI-----
Selaginella_moellendorffii_7  -----KAWIHWKGAAEIVVLAQCSNFMD--EOGNV---SPLTEPKLQELQEIDIT-----FA-NAALRTLCLACKE---FPQNEFLARA-----
Aquilegia_caerulea_6        -----GLRAHCKGASEIILDACDKFID--SNGEV---VRLDEATLNHLNNTIEQ-----FA-NEALRTLCLAYME---LGNDY-----
Medicago_truncatula_3       -----GLRAHCKGASEIVLAACDKVLN--SNGEV---VPLDEESTNHLTNTINQ-----FA-NEALRTLCLAYME---LENGF-----
A.thaliana_AT2G22950.1      -----RIRAHTKGASEIVLAACDKVIN--SSGEV---VPLDDESIKFLNVTIDE-----FA-NEALRTLCLAYMD---IESGF-----
A.thaliana_AT4G37640.1      -----RMRAHTKGASEIVLAACDKVVN--SSGEV---VPLDEESIKYLNVTINE-----FA-NEALRTLCLAYMD---IEGGF-----
Oryza_sativa_4              -----AMRAHCKGASEIILSACSKYLN--DQGNV---VPLDDATVAHLNATINS-----FA-NEALRTLCLAYVD---VGDGF-----
Zea_mays_5                   -----ALRAHCKGASEIVLASCTRYLD--ERGSA---VALDGATADRLRATIDS-----FA-NEALRTLCLAYVD---VGDGF-----
Oryza_sativa_5              -----GCRAHCKGASEIVLAACDKFMD--ETGAV---VPLDKTTADKLNGIES-----FA-NEALRTLCLGYRE---MEEGF-----
A.thaliana_AT1G27770.1     -----HFRAHCKGASEIVLDSCDKYIN--KDGEV---VPLDEKSTSHLKNIEE-----FA-SEALRTLCLAYFE---IGDEF-----
Oryza_sativa_6              -----GYRAHCKGASEIVLAACDKFID--ERGCI---VPLDDKTSSKLNDIKA-----FS-SEALRTLCLAYRE---MEEGF-----
Zea_mays_6                   -----GYRAHCKGASEVVLAACDNFID--ARGTI---VALDKTATKKLSDVIET-----FS-KEALRTLCLAYRE---MDDSF-----
Aquilegia_caerulea_7        -----GFRVFCKGASEIVLRMCDKIVD--KNGKP---ILLSEAQIENVMGING-----FA-NEALRTLCLAFKD---MDK-----
Oryza_sativa_7              -----GIRTFCKGASEIILEQCNTIHN--TDGNI---VPLSEMQKHNVLNINS-----FA-SEALRTLCIAFKD---MD-----
Selaginella_moellendorffii_8  -----TIRAHWKGASEIVLGMCDKYLD--TEGNV---CPIDEKKYRELKGIITT-----FA-DEALRTLCMAFRE---LESE-----
Selaginella_moellendorffii_9  --EQSAPSYRVHWKGASEIVMGMCDWYLD--SGRK---VALDDSKNWELRGIIRR-----FA-DEGLRTLCLAYRD---LEIAP-----
Oryza_sativa_8              -----AVTAHVKGAAEIVLARCTVYVG--ADGAA---RELGVEORRKLEQVING-----MA-AASLRCIAFAYK---VVDGGD-----
Fragilariopsis_cylindrus_13  -----DVIMYHKGAEEIILKNCTOYLD--VDGTQ---KPMTAEKRKYYENISE-----FA-GDALRCIASAHRN---QIESITK-----
Pseudo-nitzschia_multiseries_4  -----NVTMYHKGAEEIILKNCTKYLD--ANGSQ---MPLTEPKRQYFESIIQE-----FA-EDALRCIAIAHRN---EIQTITK-----
Phaeodactylum_tricornutum_4  RATKNVQSYTLYHKGAEEIVLDKCTKYLD--IDGTE---KEMSDQKREEFAKLIRE-----FA-SQALRCVALHRR---DIQNVV-----
Thalassiosira_pseudonana_6  -----GYRIYCKGASEVLVRCNOHLV--KSGND---TSEELNNETRQDILVAEM-----YA-RRGMRTLALAYRD---LPSGSD-----
Phaeodactylum_tricornutum_5  -----GYRLYCKGAPEVLLARSKSYIN--ALSEV---VDMTEDFRREFLSVSEG-----YA-RRGMRCLALAYRD---VPMEFDEGKS-----
Phaeodactylum_tricornutum_6  -----GYRLYCKGAPEVLMSRCVLFVN--ASGED---ETLTEHVLGEFQEVSVG-----YG-RRGMRCLALAYRD---IPAGFDLESLS-----

```

Skeletonema\_marinoi\_ABC -----ADNDRRHPLLSDPONYAS--IESGLTWVGMVGIKDPARPEVAESINKCHAAAGVRVIMITGDARDTAVAIARDVNILPPS-----  
 Thalassiosira\_pseudonana\_1 -----TDDCARHPLLSDPONYAK--IESGLTWVGMAGIKDPARPEVADSIKCHGAGIRVIMITGDARDTAVAIARDVNILPPA-----  
 Thalassiosira\_oceanica\_1 -----DSSDEQHPLLSDPONYAG--IENGLTWCVMGVIKDPARPEVANAIKKCHDAGVRVIMITGDARDTAVAIARDVNILPPA-----  
 Phaeodactylum\_tricornutum\_1 -----NDRAVSRHPLLSDPTNYRS--VESGLTLVGVIGIKDPARPEVAESMKQCTRAGIRVMMITGDAKDTAIAIARDVNIFSPV-----  
 Fragilariopsis\_cylindrus\_1 -----D--DIRNHPLLKDPNKYED--IESGLTLVGVIGIKDPARPEVADSIKCTQAGIRVMMITGDARDTAVAIARDVNIFNPL-----  
 Fragilariopsis\_cylindrus\_2 -----D--DIRNHPLLKDPNKYED--IESGLTLVGVIGIKDPARPEVADSIKCTQAGIRVMMITGDARDTAVAIARDVNIFNPL-----  
 Fragilariopsis\_cylindrus\_3 -----D--DIRNHPLLKDPNKYED--IESGLTLVGVIGIKDPARPEVADSIKCTQAGIRVMMITGDARDTAVAIARDVNIFNPL-----  
 Fragilariopsis\_cylindrus\_4 -----D--DIRNHPLLKDPNKYED--IESGLTLVGVIGIKDPARPEVADSIKCTQAGIRVMMITGDARDTAVAIARDVNIFNPL-----  
 Fragilariopsis\_cylindrus\_5 -----D--DIRNHPLLKDPNKYED--IESGLTLVGVIGIKDPARPEVADSIKCTQAGIRVMMITGDARDTAVAIARDVNIFNPL-----  
 Fragilariopsis\_cylindrus\_6 -----D--DIRNHPLLKDPNKYED--IESGLTLVGVIGIKDPARPEVADSIKCTQAGIRVMMITGDARDTAVAIARDVNIFNPL-----  
 Fragilariopsis\_cylindrus\_7 -----D--DIRNHPLLKDPNKYED--IESGLTLVGVIGIKDPARPEVADSIKCTQAGIRVMMITGDARDTAVAIARDVNIFNPL-----  
 Fragilariopsis\_cylindrus\_8 -----D--DIRNHPLLKDPNKYED--IESGLTLVGVIGIKDPARPEVADSIKCTQAGIRVMMITGDARDTAVAIARDVNIFNPL-----  
 Pseudo-nitzschia\_multiseriata\_1 -----DDNDVRKHPLLKDPKSYQD--IESGLTLVGLVGIKDPARPEVADSIKKCTDAGIRVIMITGDARDTAVAIARDVNIFDKDA-----  
 Thalassiosira\_pseudonana\_2 -----ENHQYNDYLKDSSEIFEV--IESDLVFGVITAIRDPPRDGVAESIDLCKQAGIRVMMITGDSKSTSVAIARDVHIFKENH-----  
 Ostreococcus\_lucimarinus\_1 -----EKHKAKHPLLKDPKSYAS--IESDLIFVGMGLRDPPEVAGAIKACHTAGIRVIMITGDNKLTAEAICTEIGVFKS-----  
 Zea\_mays\_1 -----EEHAAHKYL-LDPSYSS--IESNLIFCGFVGLRDPPEEVHKAIEDCRAAGIRVMMITGDNKETAEAICREIGVFGS-----  
 Oryza\_sativa\_1 -----EEHPAHDLL-LKPSNYSS--IESDLIFVGFVGLRDPPEEVYKAIEDCRAAGIRVMMITGDNKNTAEAICTEIGVFGP-----  
 Aquilegia\_caerulea\_1 -----EDHPAHQOL-LNPSNYSS--IESNLIFCGFVGLRDPPEEVYKAIADCRTAGIRVMMITGDNKSTAEAICTEIGVFEA-----  
 A.thaliana\_AT1G07810.1 -----EDHPAHQOL-LNPSNYSS--IESNLIFCGFVGLRDPPEEVYKAIADCRTAGIRVMMITGDNKSTAEAICTEIGVFEA-----  
 A.thaliana\_AT1G07670.1 -----EDHPAHQOL-LNPSNYSS--IEDELIFVGLVGLRDPPEEVYKAIEDCRAAGIRVMMITGDNKNTAEAICTEIGVFEA-----  
 Medicago\_truncatula\_1 -----EDHPAHQOL-LNPSNYSS--IESDLIFVGLVGLRDPPEEVYKAIEDCRDAGIRVMMITGDNKNTAEAICTEIGVFEA-----  
 Glycine\_max\_1 -----EDHPAHQOL-LNPSNYSS--IESDLIFVGLVGLRDPPEEVYKAIEDCREAGIRVMMITGDNKNTAEAICTEIGVFEA-----  
 Glycine\_max\_2 -----EDHPAHQOL-LNPSNYSS--IESDLIFVGLVGLRDPPEEVYKAIEDCREAGIRVMMITGDNKHTAEAICTEIGVFEA-----  
 Aquilegia\_caerulea\_2 -----ATHPAHVVLQDPANYPD--IESDLIFVGMVGLRDPPEEVYKAAIEDCKEAGIQVMVITGDNKKTAEAICTEIGVFEA-----  
 Selaginella\_moellendorffii\_1 -----DHPHGHARLLDTSNYDK--IESDLIFVGMAGIRDPPEEVYKAIEDCNEAGIRVMMITGDNKNTAEAICTEIGVFEA-----  
 Physcomitella\_patens\_1 -----ENHPGHARLLDTSNYDK--IESDLIFVGMAGIRDPPEEVYKAIEDCNEAGIRVMMITGDNKNTAEAICTEIGVFEA-----  
 Physcomitella\_patens\_2 -----ESHSAHKLL-LDPMNYDD--IESRLIFVGMVGLRDPPEEVYKAIEDCSEAGIRVMMITGDNKNTAEAICTEIGVFEA-----  
 Physcomitella\_patens\_3 -----ESHSAHKLL-LDPMNYDD--IESRLIFVGMVGLRDPPEEVYKAIEDCSEAGIRVMMITGDNKNTAEAICTEIGVFEA-----  
 Selaginella\_moellendorffii\_2 -----ESHSAHKLL-LDPMNYDD--IESDLVYCGMVGLRDPPEEVYKAIEDCSEAGIRVMMITGDNKNTAEAICTEIGVFEA-----  
 Glycine\_max\_3 -----DTHPAHKLL-LDPTYYSS--IESDLVFGVGLRDPPEEVYKAIEDCKEAGIRVMMITGDNKSTAEAICTEIGVFEA-----  
 Glycine\_max\_4 -----DTHPAHKLL-LDPTYYSS--IESDLVFGVGLRDPPEEVYKAIEDCKEAGIRVMMITGDNKSTAEAICTEIGVFEA-----  
 Aquilegia\_caerulea\_3 -----DSHPAHKLL-LDPMNYSS--IESNLIFCGFVGLRDPPEEVYKAIEDCRDAGIRVMMITGDNKSTAEAICTEIGVFEA-----  
 A.thaliana\_AT4G00900.1 -----EEHPSHKLL-LDPSYSS--IESNLIFCGFVGLRDPPEEVYKAIEDCRDAGIRVMMITGDNKSTAEAICTEIGVFEA-----  
 Chlamydomonas\_reinhardtii\_1 -----AEHSPAGRLL-RDPATYAA--VESLVLVGLTGLQDPPRPEVRAIPAESCKAAGIRVMMITGDNKDTAEAICTEIGVFEA-----  
 Volvox\_carteri\_1 -----SHHPAMKLL-RDPATYAA--VESLVLVGLAGLQDPPRPEVRAIPAESCKAAGIRVMMITGDNKDTAEAICTEIGVFEA-----  
 Micromonas\_pusilla\_1 -----TTHAAHASL-ADSGYAA--IESDLVFGVGLRDPPEEVYKAIEDCASAGIRVMMITGDNKNTAEAICTEIGVFEA-----  
 Micromonas\_sp\_1 -----EQHPAHKLL-MDPGKYES--IESDLTFGLVGLRDPPEEVYKAIEDCKEAGIRVMMITGDNKLTAEAICTEIGVFEA-----  
 Selaginella\_moellendorffii\_3 -----PDHPAQNILVKPEYVVL--VESQLTFVGLAGLQDPPRPEVYKAIEDCKRAGIRVMMITGDNKNTAEAICTEIGVFEA-----  
 Thalassiosira\_oceanica\_2 -----PGHPATKILGQTSFAFE--IESGLTFVGLVGIIDPPREEIAPMVQCKTAGIRMMITGDNKLTAEAICTEIGVFEA-----  
 Thalassiosira\_pseudonana\_3 -----REHKATAILSQDTSFSS--IESGLTFVGLVGIIDPPREEIAPMVQCKTAGIRMMITGDNKLTAEAICTEIGVFEA-----  
 Pseudo-nitzschia\_multiseriata\_2 -----PKEELPSQL-LNLNEYAQ--VESGLTFVGLTGIKDPPEEVYKAIKRCQDAGIRVMMITGDNKTTAEAIARDVGFHE-----  
 Fragilariopsis\_cylindrus\_9 -----SKEKLPSEL-KNINEYEA--VESLTFIAGLTIKDPPEEVYKAIKRCQDAGIRVMMITGDNKVTAEAIARDVGFHE-----  
 Fragilariopsis\_cylindrus\_10 -----SKEKLPSEL-KNINEYEA--VESLTFIAGLTIKDPPEEVYKAIKRCQDAGIRVMMITGDNKVTAEAIARDVGFHE-----  
 Aquilegia\_caerulea\_4 -----D--DEKDLTFIAGLVGMLDPPRDEVRNAMSCTAGIRVIVVTGDNKSTAEALCRKIGAFDH-----  
 Glycine\_max\_5 -----D--DEKDLTFIAGLVGMLDPPRDEVRNAMSCTAGIRVIVVTGDNKSTAEALCRKIGAFDH-----  
 Medicago\_truncatula\_2 -----D--DEKDLTFIAGLVGMLDPPRDEVRNAMSCTAGIRVIVVTGDNKSTAEALCRKIGAFDH-----  
 A.thaliana\_AT1G10130.1 -----D--NENDLTFIAGLVGMLDPPRDEVRNAMSCTAGIRVIVVTGDNKSTAEALCRKIGAFDH-----  
 Oryza\_sativa\_2 -----D--DEANLTFIAGLVGMLDPPRDEVRNAMSCTAGIRVIVVTGDNKSTAEALCRKIGAFDH-----  
 Selaginella\_moellendorffii\_4 -----D--DENGLLIGMVGMLDPPRPEVYKAAIATCKSAGIRVMMITGDNKKTAEALCHRIGVFEA-----  
 Micromonas\_pusilla\_2 -----D--DERDLTFIAGLVGMLDPPRPEVYKAAIATCKSAGIRVMMITGDNKSTAEALCHRIGVFEA-----  
 Micromonas\_sp\_2 -----S--DETGLTFIAGLVGMLDPPRPEVYKAAIATCKSAGIRVMMITGDNKLTAEAIARDVGFHE-----  
 Volvox\_carteri\_2 -----A--DESGLTFIAGLVGMLDPPRPEVYKAAIATCKSAGIRVMMITGDNKATAEAVAROVGGLPRE-----  
 Chlamydomonas\_reinhardtii\_2 -----A--DEAGLTFIAGLVGMLDPPRPEVYKAAIATCKSAGIRVMMITGDNKATAEAVAROVGGLPRE-----  
 Dunaliella\_salina\_1 -----N--DESGLTFIAGLVGMLDPPRPEVYKAAIATCKSAGIRVMMITGDNKATAEAVAROVGGLPRE-----  
 Ostreococcus\_lucimarinus\_2 -----T--DENNLTFIAGLVGMLDPPRPEVYKAAIATCKSAGIRVMMITGDNKATAEAVAROVGGLPRE-----  
 Phaeodactylum\_tricornutum\_2 -----S--SLGELVFAGLVGMLDPPRPEVYKAAIATCKSAGIRVMMITGDNKATAEAVAROVGGLPRE-----  
 Chlamydomonas\_reinhardtii\_3 -----AWLLS--GGVNP-EAAAAAAAE--GKPPPAPA--AKLQLSMVLVAILDPPRPEVYKAAIATCKSAGIRVMMITGDNKATAEAVAROVGGLPRE-----  
 Chlamydomonas\_reinhardtii\_4 -----AWLLS--GGVNP-EAAAAAAAE--GKPPPAPA--AKLQLSMVLVAILDPPRPEVYKAAIATCKSAGIRVMMITGDNKATAEAVAROVGGLPRE-----  
 Thalassiosira\_pseudonana\_4 -----LQGEFVNGRPEKWLTMVGLCAIMDPPRPEVYKAAIATCKSAGIRVMMITGDNKATAEAVAROVGGLPRE-----  
 Thalassiosira\_pseudonana\_5 -----LQGEFVNGRPERKWLTMVGLCAIMDPPRPEVYKAAIATCKSAGIRVMMITGDNKATAEAVAROVGGLPRE-----

```

Fragilariopsis_cylindrus_11 -----LKPEFVSG--KEPWLTIIVGLCAIIDPPRSECVVAIEEAHHASVRVAMITGDHKDTALAI GATLGLV--DVEH-----
Fragilariopsis_cylindrus_12 -----LKPEFVSG--KEPWLTIIVGLCAIIDPPRSECVVAIEEAHHASVRVAMITGDHKDTALAI GATLGLV--DVEH-----
Pseudo-nitzschia_multiseriis_3 -----LKPEFVNG--REPWLTIMVGLCAIVDPPRPECVVAIEEAHHASVRVAMITGDHKDTALAI GASLGLV--DTEH-----
Phaeodactylum_tricornutum_3 -----GEPWLTIVGLCAIMDPPRPECVQAIAEAHGAGVRVAMITGDHRDTALAI GMSLGLV--DREH-----
Micromonas_pusilla_3 -----DITDKVFAK--LVNDLTFGCGLCASIDPERDGVKDAVRTSKVAGVRVVMITGDYIKTAIAIAKNI GIL--NAKTFTEG-----
Micromonas_sp_3 -----ETDAKFDK--IVNGLTLCGLCASIDPERDGVKDSVLSRQAGVRVVMITGDYIKTAIAIAKNI NIL--NRHFTTEG-----
Chlamydomonas_reinhardtii_5 -----ARPA--DFFEDADQ--VDRDLIAVAIVGIKDPVVRKEVPDAVATCQKAGIVVRMVTGDN IHTAQHIARECGLLTTE-----
Chlamydomonas_reinhardtii_6 -----ARPA--DFFEDADQ--VDNGLTCLAIVGIKDPVVRKEVPDAVRTCQKAGITVVRMVTGDN IHTAQHISRECGIL--VE-----
Volvox_carteri_3 -----VRTP--DFFEDADQ--VDNGLIACAIVGIKDPVRAEVPDAVRTCQAGIVVRMVTGDN IHTARHIARECGIL--VD-----
Volvox_carteri_4 -----VRTP--DFFEDADQ--VDNGLIACAIVGIKDPVRAEVPDAVRTCQAGIVVRMVTGDN IHTARHIARECGIL--VD-----
Volvox_carteri_5 -----KRPA--DFFEDVDN--VDNDLTCIGIVGIKDPVVRTEVPDAVRTCKRAGITVVRMVTGDN IHTARHIARECGIL--YDMG-----
Chlamydomonas_reinhardtii_7 -----SRPE--NFFEEADT--VDDNLTCLGIVGIKDPVRAEVPDAVRTCKRAGIVVRMVTGDN IHTAQHIARECGIL--YDMG-----
Chlamydomonas_reinhardtii_8 -----SRPA--DFFEDSDN--LDRNLVALAIVGIKDPVVRKEVPEAVRVCQAGITVVRMVTGDN IHTAQHIARECGIL--TE-----
Volvox_carteri_6 -----SRPL--DFFEDSDY--LDRNLVAMAIVGIKDPVVRKEVPEAVRVCQAGITVVRMVTGDN IHTAQHIARECGIL--TD-----
Ostreococcus_lucimarinus_3 -----SLGETP--PESDLTLLGIMGIKDPVIRPETAEAVRLLRGAGITVVRMVTGDN IHTAEAIAREAGIL--EDGD-----
Micromonas_sp_4 -----GLSDEP--PEANLTLGGITGIKDPVIRPETAEAVRLLRQAGIVVRMVTGDN IHTAEAIAREAGIL--EDGD-----
Selaginella_moellendorffii_5 -----S--MDGRPI--PTAGLTFVALVIGIKDPCRPGVDEAVRKCQAGIVVRMVTGDN IHTARAIARECGIL--MP-----
A.thaliana_AT3G21180.1 -----PKEQ--EDLDKQWAL--PEDELILLAIVGIKDPCRPGVREAVRICTSAGVVKVRMVTGDN IHTAKAIALECGIL--SS-----
Aquilegia_caerulea_5 -----PKDE--DLEQWVI--PEEDLVLLAIVGIKDPCRPGVKNVAVQLCTNAGVVKVRMVTGDN IHTAKAIALECGIL--DS-----
A.thaliana_AT5G57110.2 -----PTGE--E--LSKWVL--PEDDLILLAIVGIKDPCRPGVKSIVLCCONAGVVKVRMVTGDN IHTAKAIALECGIL--SS-----
Oryza_sativa_3 -----PSED--R--RVDWIL--PEDDLIMLGIVGIKDPCRPGVDEAVRKCQAGIVVRMVTGDN IHTAKAIALECGIL--S-----
Zea_mays_2 -----PDED--R--REEWQL--PEDNLMILGIVGIKDPCRPGVRSVRLCQAAGIKVRMVTGDN IHTAKAIALECGIL--D-----
Zea_mays_3 -----PMES--L--DKWKL--PEDDLTLIGMVGIKDPCRPGVKNVAVQLCTAGVVKVRMVTGDN IHTAKAIAVECGIL--DA-----
Zea_mays_4 -----PMED--ITSWEL--PEDDLTLGGIIGIKDPCRPGVDAVRLCTTAGVVKVRMVTGDN IHTAKAIALECGIL--DA-----
Selaginella_moellendorffii_6 -----PDES--E--WESWKI--PEDDLVLLGIMGIKDPCRPGVDEAVRKCQAGIVVRMVTGDN IHTARAIARECGIL--SP-----
Selaginella_moellendorffii_7 -----PPKKH--S--TIGPPI--PEDGLTCLAIVGIKDPCRPGVPEAVHKQIAGIKVRMVTGDN IHTAKAIAVECGIL--T-----
Aquilegia_caerulea_6 -----SKDSI--PLKGYTCIGIVGIKDPVVRPGVKE$VAICRSAGITVVRMVTGDN IHTAKAIAARECGIL--TD-----
Medicago_truncatula_3 -----SAEDTI--PVTGYTCIGVVGIKDPCRPGVKE$VALCRSAGITVVRMVTGDN IHTAKAIAARECGIL--TD-----
A.thaliana_AT2G22950.1 -----SADEGI--PEKGFTICIGIVGIKDPVVRPGVRESVELCRRAGIMVRMVTGDN IHTAKAIAARECGIL--TD-----
A.thaliana_AT4G37640.1 -----SPDDAI--PASGFTCVGIVGIKDPVVRPGVKE$VELCRRAGITVVRMVTGDN IHTAKAIAARECGIL--TD-----
Oryza_sativa_4 -----SANDQI--PEDGYTCIGIVGIKDPVVRPGVKE$VAICRSAGIMVRMVTGDN IHTAKAIAARECGIL--TE-----
Zea_mays_5 -----SPSEQI--PTDGYTCICVVGIKDPCRPGVKE$VAICRSAGITVVRMVTGDN IHTAKAIAARECGIL--TD-----
Oryza_sativa_5 -----SVEEQI--PLQGYTCIGIVGIKDPVVRPGVRESVATCRSAGIMVRMVTGDN IHTAKAIAARECGIL--TE-----
A.thaliana_AT1G27770.1 -----SLEAPI--PSGGYTCIGIVGIKDPVVRPGVKE$VAICRSAGITVVRMVTGDN IHTAKAIAARECGIL--TD-----
Oryza_sativa_6 -----STQEQI--PLQGYTCIGIVGIKDPVVRPGVRSVATCRSAGISVRMITGDN IHTAKAIAARECGIL--TK-----
Zea_mays_6 -----SVDEQI--PLQGYTCIGIVGIKDPVVRPGVRSVATCRSAGIAVRMVTGDN IHTAKAIAARECGIL--TE-----
Aquilegia_caerulea_7 -----SSGDSL--PSEGYTLIAVVGIKDPCRPGVKEAVQTLAAGITVVRMVTGDN IHTAKAIAARECGIL--TD-----
Oryza_sativa_7 -----EFPNDQPI--SDDGYTLIAVVGIKDPCRPGVKDAVRTCMAAGIRVRMVTGDN IHTAKAIAARECGIL--TE-----
Selaginella_moellendorffii_8 -----PAEDKL--PDNGFTICIGIVGIKDPVVRPGVREAVQLCFAAGIKVRMVTGDN IHTAKAIAARECGIL--T-----
Selaginella_moellendorffii_9 -----QGEAL--PQQGFVCAGIVGIKDPVVRPGVEAVRMCMSAGIRVRMVTGDN IHTAKAIAARECGIL--TD-----
Oryza_sativa_8 -----SDNAKI--DDEGLTLLGFVLDKPCRPEVKSIAEACTKAGIAVKMVTGDN IHTAKAIAARECGIL--SGND-----
Fragilariopsis_cylindrus_13 -----DISTF--SIADCESE--LEKDMCLDALVGIADPLRGDVIEAVATCQRCGIFVRMVTGDN IHTAKAIAQAGIL--TE-----
Pseudo-nitzschia_multiseriis_4 -----DISKV--VVGDCEST--LEKDMCLDALVGISDPLREDVDAIAVCQKAGIFVRMVTGDN IHTAKAIAQAGIL--TK-----
Phaeodactylum_tricornutum_4 -----DPQTV--TQDCEKK--LEKEMCLDAIAGIMDPLRPVVEAVAIQCRAGIFVRMVTGDN IHTAKAIAQAGIL--TE-----
Thalassiosira_pseudonana_6 -----NVLN--SDGSEALS--VETELVFAALVGIEDPLRPEVQEAIKKCY$SAGIDVRLVTDSPNTAVSIAYQADIL--QDFHF$RNDSD-----
Phaeodactylum_tricornutum_5 -----SVIKN--ADGTEANE--IETEMTSYCPHWYRRPSSR-----VTGDNPNTAVSIAYQAGIL--RDFHFLE$SI-----
Phaeodactylum_tricornutum_6 -----SEHTN--ADGRDAYV--AETDLIAIALVGIEDPLRAEVPGAIEKCYQAGIDVRLVTDSPNTAVSIAYQAGIL--RDFHFLE$NTD-----

```



|                                |                          |       |                     |            |            |          |       |
|--------------------------------|--------------------------|-------|---------------------|------------|------------|----------|-------|
| Skeletonema_marinoi_ABC        | SSGQ                     | M     | V                   | K          | AYEGREFFVK | PEK      | FOLE  |
| Thalassiosira_pseudonana_1     | SSGD                     | M     | I                   | K          | AYEGREFFNK | PES      | EQLQ  |
| Thalassiosira_oceanica_1       | SLGH                     | Q     | I                   | K          | AYEGREFFLK | PDD      | EQLO  |
| Phaeodactylum_tricornutum_1    | DDGR                     | P     | L                   | K          | AYEGREFFLK | AER      | EQLE  |
| Fragilariopsis_cylindrus_1     | ETDPT                    | K     | L                   | K          | AYEGQEFFLK | PKE      | EQIE  |
| Fragilariopsis_cylindrus_2     | ETDPT                    | K     | L                   | K          | AYEGQEFFLK | PKE      | EQIE  |
| Fragilariopsis_cylindrus_3     | ETDPT                    | K     | L                   | K          | AYEGQEFFLK | PKE      | EQIE  |
| Fragilariopsis_cylindrus_4     | ETDPT                    | K     | L                   | K          | AYEGQEFFLK | PKE      | EQIE  |
| Fragilariopsis_cylindrus_5     | ETDPT                    | K     | L                   | K          | AYEGQEFFLK | PKE      | EQIE  |
| Fragilariopsis_cylindrus_6     | ETDPT                    | K     | L                   | K          | AYEGQEFFLK | PKE      | EQIE  |
| Fragilariopsis_cylindrus_7     | ETDPT                    | K     | L                   | K          | AYEGQEFFLK | PKE      | EQIE  |
| Fragilariopsis_cylindrus_8     | ETDPT                    | K     | L                   | K          | AYEGQEFFLK | PKE      | EQIE  |
| Pseudo-nitzschia_multiseries_1 | PADGT                    | S     | L                   | K          | AFEGQEFFLK | PRE      | EQIE  |
| Thalassiosira_pseudonana_2     | EEGTT                    | H     | S                   | R          | AYEGREFFAL | PEA      | EQFD  |
| Ostreococcus_lucimarinus_1     | SADV                     | K     | G                   | K          | SFTGREFAAM | SKS      | KQLK  |
| Zea_mays_1                     | HEDI                     | S     | S                   | K          | SFTGKEFMGL | S        | DKKE  |
| Oryza_sativa_1                 | TEDI                     | S     | S                   | K          | SFTGKEFMSI | S        | DKKK  |
| Aquilegia_caerulea_1           | KEDI                     | S     | T                   | K          | SLTGKEFMEL | H        | DQKI  |
| A.thaliana_AT1G07810.1         | DEDI                     | S     | S                   | R          | SLTGIEFMDV | Q        | DQKN  |
| A.thaliana_AT1G07670.1         | DEDI                     | S     | S                   | R          | SLTGKEFMDV | K        | DQKN  |
| Medicago_truncatula_1          | NENI                     | S     | S                   | K          | SLTGKDFMEL | R        | DKKA  |
| Glycine_max_1                  | DEDI                     | S     | S                   | K          | SLTGRDFMEL | H        | DKKA  |
| Glycine_max_2                  | DEDI                     | S     | S                   | K          | SLTGRDFMEL | R        | DKKT  |
| Aquilegia_caerulea_2           | HEDI                     | R     | P                   | K          | SLTGREFMDL | R        | DQKN  |
| Selaginella_moellendorffii_1   | GENL                     | S     | G                   | K          | SFTGRDFLSL | PDD      | QRRK  |
| Physcomitella_patens_1         | GEDL                     | K     | D                   | K          | SFTGREFMEE | SPE      | RRRK  |
| Physcomitella_patens_2         | NEDI                     | R     | D                   | K          | SFTGHEFMEE | SVE      | RRKQ  |
| Physcomitella_patens_3         | DEDL                     | R     | E                   | K          | SYTGREFMDL | TPE      | KRKE  |
| Selaginella_moellendorffii_2   | GESL                     | A     | G                   | K          | SFTGKDFMAL | STE      | QRCK  |
| Glycine_max_3                  | DEDL                     | T     | G                   | Q          | SLAGKEFISL | SHS      | EQVK  |
| Glycine_max_4                  | DEDL                     | T     | G                   | Q          | SLTGKEFISF | SPS      | EQVK  |
| Aquilegia_caerulea_3           | SEDL                     | R     | L                   | R          | SYTGKEFMAL | SST      | LQKE  |
| A.thaliana_AT4G00900.1         | NEDL                     | S     | Q                   | S          | SFTGKEFMSI | PAS      | RRSE  |
| Chlamydomonas_reinhardtii_1    | GDDV                     | S     | L                   | Y          | SYTGRDFVSL | PRE      | RQME  |
| Volvox_carteri_1               | GDDL                     | S     | S                   | V          | SFTGRAFVAL | PRE      | RQLE  |
| Micromonas_pusilla_1           | AEDV                     | A     | G                   | R          | SFTGREFGAM | TKA      | KQFA  |
| Micromonas_sp_1                | PSDA                     | V     | G                   | R          | SFTGREFSDM | PLA      | KKKK  |
| Selaginella_moellendorffii_3   | QNDL                     | S     | E                   | H          | SLTGKDFMKL | SVS      | DRRA  |
| Thalassiosira_oceanica_2       | GFDP                     |       | E                   | C          | SFTGTDFFRM | GEA      | DQLK  |
| Thalassiosira_pseudonana_3     | GFDA                     |       | D                   | S          | SFTGSDFFKK | SDS      | EQLO  |
| Pseudo-nitzschia_multiseries_2 | GDNL                     | A     | G                   | K          | SFTGAEFFQG | SISDE    | ERAR  |
| Fragilariopsis_cylindrus_9     | DDDL                     | K     | G                   | K          | SFTGAEFFHG | SISDE    | ERAR  |
| Fragilariopsis_cylindrus_10    | DDDL                     | K     | G                   | K          | SFTGAEFFHG | SISDE    | ERAR  |
| Aquilegia_caerulea_4           | LEDF                     | S     | G                   | R          | SYTASEFEEL | PAL      | OKGS  |
| Glycine_max_5                  | LIDF                     | A     | E                   | H          | SYTASEFEEL | PAL      | QOTI  |
| Medicago_truncatula_2          | LIDF                     | T     | E                   | H          | SYTASEFEEL | PAL      | QOTI  |
| A.thaliana_AT1G10130.1         | LVDF                     | S     | G                   | M          | SYTASEFERL | PAV      | QOTL  |
| Oryza_sativa_2                 | LEDF                     | T     | G                   | Y          | SYTASEFEGL | PPL      | EKAN  |
| Selaginella_moellendorffii_4   | SDDV                     | S     | S                   | K          | SLTAAEFDSL | TPM      | QQAV  |
| Micromonas_pusilla_2           | ATSTQLLARK               | MIDDA | AKAGLATNAGVLLPPG    | K          | SFTGLEFDEM | SAA      | EQSD  |
| Micromonas_sp_2                |                          |       | GIMFPPD             | R          | SYEGLEFDEM | DGL      | TQSN  |
| Volvox_carteri_2               | AEDDEAAL                 | Q     | G                   | L          | SYTGQEFDAL | SASPGGSS | EQSA  |
| Chlamydomonas_reinhardtii_2    | SSPYGYQNHNMYDDADAEADEAAL | R     | G                   | L          | SYTGQEFDAL | AGGGGFSS | DEQAA |
| Dunaliella_salina_1            | DDEDT                    | P     | G                   | F          | SYTGRQFEEM | GAL      | GOAA  |
| Ostreococcus_lucimarinus_2     | STQNSF                   | K     | G                   | K          | SFTGVFEFAM | TIE      | QREE  |
| Phaeodactylum_tricornutum_2    | ENG                      | D     | T                   | A          | ALSGAELDAI | SPO      | NLAE  |
| Chlamydomonas_reinhardtii_3    | KAANEPPAKA               |       | AAGHGHGHDARRASSKAVP | VITGPQVDAM | DDA        | GLQA     |       |
| Chlamydomonas_reinhardtii_4    | DDEAPART                 |       | ALATAAGARRPAAAVP    | VITGPQVDAM | DDA        | GLQA     |       |
| Thalassiosira_pseudonana_4     |                          |       | S                   | E          | AVTGPELDAM | SDD      | ELRK  |
| Thalassiosira_pseudonana_5     |                          |       | S                   | E          | AVTGPELDAM | SDD      | EIRK  |

|                                |       |    |       |       |                                       |       |              |       |      |
|--------------------------------|-------|----|-------|-------|---------------------------------------|-------|--------------|-------|------|
| Fragilariopsis_cylindrus_11    | ----- | P  | ----- | G     | SITGPELDAM                            | ----- | DDE          | ----- | EFKK |
| Fragilariopsis_cylindrus_12    | ----- | P  | ----- | G     | SITGPELDAM                            | ----- | DDE          | ----- | EFKK |
| Pseudo-nitzschia_multiseriis_3 | ----- | P  | ----- | A     | AITGPELDSM                            | ----- | SDE          | ----- | EIKK |
| Phaeodactylum_tricornutum_3    | ----- | S  | ----- | E     | AVTGPEMDSM                            | ----- | SEA          | ----- | ELRI |
| Micromonas_pusilla_3           | N     | GE | ----- | ----- | ATDCKALRPE                            | ----- | KDTEYASSD    | ----- | KIDA |
| Micromonas_sp_3                | N     | GE | ----- | ----- | ATDCGALRPH                            | ----- | KEGEYLSNP    | ----- | FIDA |
| Chlamydomonas_reinhardtii_5    | D     | A  | ----- | I     | AMEGPVFRAM                            | ----- | PAT          | ----- | ELIP |
| Chlamydomonas_reinhardtii_6    | D     | C  | ----- | I     | ALEGPVFRAM                            | ----- | PAT          | ----- | ELIP |
| Volvox_carteri_3               | D     | G  | ----- | I     | AMEGPAFRNM                            | ----- | PAG          | ----- | ELVP |
| Volvox_carteri_4               | D     | G  | ----- | I     | AMEGPAFRNM                            | ----- | PAG          | ----- | ELVP |
| Volvox_carteri_5               | PGKP  | E  | ----- | V     | AMEGPAFRDMLKEDSFVALRERIADDKA          | ----- | ALC          | ----- | ELRE |
| Chlamydomonas_reinhardtii_7    | PNHP  | E  | ----- | H     | AMEGPVFRREMLKDPDFMALRERMNDPKADGQKEALQ | ----- | AAQ          | ----- | EMKE |
| Chlamydomonas_reinhardtii_8    | ----- | A  | ----- | V     | AMEGPDFFRM                            | ----- | AAQ          | ----- | ELLP |
| Volvox_carteri_6               | D     | C  | ----- | I     | ALEGPDFRKM                            | ----- | AAQ          | ----- | ELLP |
| Ostreococcus_lucimarinus_3     | D     | G  | ----- | L     | VLEGPDFRKM                            | ----- | SDA          | ----- | EKEA |
| Micromonas_sp_4                | D     | G  | ----- | I     | ILEGPVFRKM                            | ----- | SQS          | ----- | EKEA |
| Selaginella_moellendorffii_5   | G     | G  | ----- | L     | VCEGSFFRNL                            | ----- | TDN          | ----- | ERFQ |
| A.thaliana_AT3G21180.1         | D     | TE | ----- | A     | VEPT                                  | ----- | SEK          | ----- | EREQ |
| Aquilegia_caerulea_5           | D     | AA | ----- | A     | TEPN                                  | ----- | SDS          | ----- | AREE |
| A.thaliana_AT5G57110.2         | D     | AD | ----- | L     | SEPT                                  | ----- | TDA          | ----- | ERDK |
| Oryza_sativa_3                 | D     | PN | ----- | V     | SEPV                                  | ----- | SDL          | ----- | EREE |
| Zea_mays_2                     | D     | PN | ----- | V     | SEPV                                  | ----- | SDL          | ----- | ERED |
| Zea_mays_3                     | ----- | K  | ----- | D     | AEPN                                  | ----- | SET          | ----- | ARED |
| Zea_mays_4                     | ----- | N  | ----- | S     | IEPV                                  | ----- | SES          | ----- | ARGE |
| Selaginella_moellendorffii_6   | ----- | G  | ----- | L     | VVEGKDFRSY                            | ----- | TDE          | ----- | ERLE |
| Selaginella_moellendorffii_7   | N     | G  | ----- | T     | AIEGKDFRNM                            | ----- | SPD          | ----- | EQYE |
| Aquilegia_caerulea_6           | G     | G  | ----- | I     | AIEGPVFREK                            | ----- | SLE          | ----- | ELQE |
| Medicago_truncatula_3          | D     | G  | ----- | I     | AIEGPEFREK                            | ----- | SLE          | ----- | ELLE |
| A.thaliana_AT2G22950.1         | D     | G  | ----- | I     | AIEGPVFREK                            | ----- | NQE          | ----- | EMLE |
| A.thaliana_AT4G37640.1         | D     | G  | ----- | I     | AIEGPVFREK                            | ----- | NQE          | ----- | ELLE |
| Oryza_sativa_4                 | G     | G  | ----- | I     | AIEGPDFRTK                            | ----- | SAE          | ----- | ELNE |
| Zea_mays_5                     | G     | G  | ----- | V     | AIEGPDFRVK                            | ----- | TEE          | ----- | ELQE |
| Oryza_sativa_5                 | D     | G  | ----- | L     | AIEGPEFREK                            | ----- | SLD          | ----- | ELLK |
| A.thaliana_AT1G27770.1         | ----- | G  | ----- | I     | AIEGPEFREK                            | ----- | SDE          | ----- | ELLK |
| Oryza_sativa_6                 | D     | G  | ----- | I     | AIEGAEFREK                            | ----- | SAE          | ----- | ELHD |
| Zea_mays_6                     | D     | G  | ----- | I     | AIEGAEFREK                            | ----- | NPE          | ----- | ELLE |
| Aquilegia_caerulea_7           | D     | G  | ----- | V     | AIEGPDFRKM                            | ----- | SPO          | ----- | EMKD |
| Oryza_sativa_7                 | D     | G  | ----- | I     | AIEGQQLNKK                            | ----- | SSD          | ----- | ELKE |
| Selaginella_moellendorffii_8   | ----- | D  | ----- | E     | AIEGPDFRRL                            | ----- | STE          | ----- | EMRK |
| Selaginella_moellendorffii_9   | ----- | G  | ----- | E     | AVEGPVFRSW                            | ----- | TGE          | ----- | EMRR |
| Oryza_sativa_8                 | DDA   | AG | ----- | V     | VIEGHEFRAM                            | ----- | SEQ          | ----- | EQLA |
| Fragilariopsis_cylindrus_13    | G     | G  | ----- | I     | AMTGDEFRLK                            | ----- | TPA          | ----- | ELDD |
| Pseudo-nitzschia_multiseriis_4 | G     | G  | ----- | T     | AMTGEEFRKL                            | ----- | TPA          | ----- | ELDR |
| Phaeodactylum_tricornutum_4    | G     | G  | ----- | I     | SMIGEKFRKL                            | ----- | TPA          | ----- | QLDE |
| Thalassiosira_pseudonana_6     | ----- | P  | ----- | V     | LMEGKVFRRKVVYRI                       | ----- | DDDGKKEFDQT  | ----- | AFDN |
| Phaeodactylum_tricornutum_5    | ----- | E  | ----- | V     | LMEGKAFRNQVYIS                        | ----- | RGESGSGEFNQL | ----- | EFDK |
| Phaeodactylum_tricornutum_6    | ----- | E  | ----- | V     | LMEGKAFRRMVYVD                        | ----- | GKEKGSKEFDQS | ----- | AFDK |

1301

|                                |     |        |              |               |     |      |    |
|--------------------------------|-----|--------|--------------|---------------|-----|------|----|
| Skeletonema_marinoi_ABC        | LL  | AT     | GNMIFC       | RAEPSDKQRLIK  | MLQ | S    | Q  |
| Thalassiosira_pseudonana_1     | LL  | ASP    | GNMVFC       | RAEPSDKQRLIK  | MLQ | S    | L  |
| Thalassiosira_oceanica_1       | LL  | KSP    | GNMVFC       | RAEPADKQKLIK  | MLQ | S    | L  |
| Phaeodactylum_tricornutum_1    | IL  | RE     | GNIVFC       | RAEPADKQKLVK  | MLQ | N    | L  |
| Fragilariopsis_cylindrus_1     | IL  | KS     | DNIVFC       | RAQPSDKQKLIK  | MLQ | SKEL |    |
| Fragilariopsis_cylindrus_2     | IL  | KS     | DNIVFC       | RAQPSDKQKLIK  | MLQ | SKEL |    |
| Fragilariopsis_cylindrus_3     | IL  | KS     | DNIVFC       | RAQPSDKQKLIK  | MLQ | SKEL |    |
| Fragilariopsis_cylindrus_4     | IL  | KS     | DNIVFC       | RAQPSDKQKLIK  | MLQ | SKEL |    |
| Fragilariopsis_cylindrus_5     | IL  | KS     | DNIVFC       | RAQPSDKQKLIK  | MLQ | SKEL |    |
| Fragilariopsis_cylindrus_6     | IL  | KS     | DNIVFC       | RAQPSDKQKLIK  | MLQ | SKEL |    |
| Fragilariopsis_cylindrus_7     | IL  | KS     | DNIVFC       | RAQPSDKQKLIK  | MLQ | SKEL |    |
| Fragilariopsis_cylindrus_8     | IL  | KS     | DNIVFC       | RAQPSDKQKLIK  | MLQ | SKEL |    |
| Pseudo-nitzschia_multiseries_1 | IL  | SK     | DNIVFC       | RAQPSDKQALIK  | MLQ | N    | DL |
| Thalassiosira_pseudonana_2     | VL  | KS     | GNLVIC       | RAEPSDKQRLVK  | MLQ | S    | T  |
| Ostreococcus_lucimarinus_1     | AL  | LGE    | GGRVFS       | RTEPKHKQDIVR  | LLR | D    | S  |
| Zea_mays_1                     | LL  | RQQ    | GGLLFS       | RAEPKHKQEIVR  | LLK | E    | D  |
| Oryza_sativa_1                 | LL  | ROT    | GGLLFS       | RAEPKHKQEIVR  | LLK | E    | D  |
| Aquilegia_caerulea_1           | HL  | RQS    | GGLLFS       | RAEPRHKQEIVR  | LLK | E    | D  |
| A.thaliana_AT1G07810.1         | HL  | ROT    | GGLLFS       | RAEPKHKQEIVR  | LLK | E    | D  |
| A.thaliana_AT1G07670.1         | HL  | ROT    | GGLLFS       | RAEPKHKQEIVR  | LLK | E    | D  |
| Medicago_truncatula_1          | YL  | ROT    | GGLLFS       | RAEPRHKQDIVR  | LLK | E    | D  |
| Glycine_max_1                  | YL  | RQH    | GGLLFS       | RAEPRHKQEIVR  | LLK | E    | E  |
| Glycine_max_2                  | YL  | RQP    | GGLLFS       | RAEPRHKQEIVR  | LLK | E    | E  |
| Aquilegia_caerulea_2           | HL  | RQS    | GGLLFS       | RAEPRHKQEIVR  | LLK | E    | D  |
| Selaginella_moellendorffii_1   | VL  | SGK    | GGRVFS       | RAEPRHKQEIVR  | MLK | E    | A  |
| Physcomitella_patens_1         | IL  | SGT    | GGRVFS       | RAEPKHKQDIVR  | ILK | E    | A  |
| Physcomitella_patens_2         | IL  | SGT    | GGRVFS       | RAEPKHKQDIVR  | ILK | D    | A  |
| Physcomitella_patens_3         | IL  | FGK    | GGRVFS       | RAEPKHKQDIVR  | ILK | D    | G  |
| Selaginella_moellendorffii_2   | VL  | SGS    | GGRVFS       | RAEPRHKQEIVR  | MLK | D    | A  |
| Glycine_max_3                  | IL  | LRP    | GKVFVS       | RAEPRHKQEIVR  | LLK | E    | M  |
| Glycine_max_4                  | IL  | LRP    | GKVFVS       | RAEPRHKQEIVR  | LLK | E    | M  |
| Aquilegia_caerulea_3           | IL  | SKP    | GGMVFS       | RAEPKHKQEIVR  | MLK | E    | M  |
| A.thaliana_AT4G00900.1         | IL  | SKS    | GKVFVS       | RAEPRHKQEIVR  | MLK | E    | M  |
| Chlamydomonas_reinhardtii_1    | IL  | ASA    | PAMCFS       | RAEPRHKQDIVR  | LLK | E    | Q  |
| Volvox_carteri_1               | LL  | AAA    | PAMCFS       | RAEPRHKQDIVR  | LLK | E    | Q  |
| Micromonas_pusilla_1           | AL  | TAP    | GGCVFS       | RAEPKHKQDIVR  | LLK | E    | R  |
| Micromonas_sp_1                | LL  | ATP    | GGCVFS       | RAEPKHKQDIVR  | LLK | E    | A  |
| Selaginella_moellendorffii_3   | LL  | GNQSDS | KGFVFS       | RSEP1HKQEIVR  | VLK | D    | G  |
| Thalassiosira_oceanica_2       | IL  | AGD    | GGLVFS       | RTEPTHKQQLVK  | LLK | S    | Q  |
| Thalassiosira_pseudonana_3     | IL  | MKDN   | GGLVFS       | RTEPRHKQQLVK  | LLK | S    | Q  |
| Pseudo-nitzschia_multiseries_2 | LIM | QGG    | GSRVFS       | RTEPRDKQLLVK  | LLR | S    | C  |
| Fragilariopsis_cylindrus_9     | LIM | VGG    | GSRVFS       | RTEPRDKQLLVK  | LLR | N    | C  |
| Fragilariopsis_cylindrus_10    | LIM | VGG    | GSRVFS       | RTEPRDKQLLVK  | LLR | N    | C  |
| Aquilegia_caerulea_4           | AL  | Q      | HMLFT        | RVEPSHKRMLVE  | ALQ | Q    | Q  |
| Glycine_max_5                  | AL  | Q      | RMALFT       | RVEPSHKRMLVE  | ALQ | H    | Q  |
| Medicago_truncatula_2          | AL  | Q      | RMALFT       | RVEPSHKRMLVE  | ALQ | H    | Q  |
| A.thaliana_AT1G10130.1         | AL  | R      | RMTLFS       | RVEPSHKRMLVE  | ALQ | K    | Q  |
| Oryza_sativa_2                 | AL  | Q      | RMVLFSSFTGCC | RVEPSHKRMLVE  | ALQ | L    | H  |
| Selaginella_moellendorffii_4   | AV  | Q      | NLVLS        | RVNPSHKSMMLVD | VLK | R    | H  |
| Micromonas_pusilla_2           | AV  | A      | NMAVFS       | RVEPRHKSKLIE  | ILK | R    | Q  |
| Micromonas_sp_2                | AA  | L      | SMSVFS       | RVEPLHKTRLVE  | LLK | A    | H  |
| Volvox_carteri_2               | AV  | S      | RLAVFS       | RVEPMHKLRLEVE | LLR | S    | Q  |
| Chlamydomonas_reinhardtii_2    | AV  | D      | NVVVLS       | RVEPMHKLRLEVE | QLR | A    | R  |
| Dunaliella_salina_1            | AT  | R      | NLVVLS       | RVEPMHKLRLEVE | LLK | A    | Q  |
| Ostreococcus_lucimarinus_2     | AA  | R      | TMCVFS       | RVEPAQKSKLVE  | ILK | R    | Q  |
| Phaeodactylum_tricornutum_2    | SI  | S      | GVRVfy       | RVAPRHKLAIVR  | ALQ | E    | R  |
| Chlamydomonas_reinhardtii_3    | VV  | M      | GCVVFA       | RASPENKLRIVR  | ALQ | A    | L  |
| Chlamydomonas_reinhardtii_4    | VV  | M      | GCVVFA       | RASPENKLRIVK  | ALQ | A    | L  |
| Thalassiosira_pseudonana_4     | CV  | M      | THNVFA       | RASPONKIRIVK  | ALQ | A    | E  |
| Thalassiosira_pseudonana_5     | CV  | L      | THNVFA       | RASPONKIRIVK  | ALQ | A    | E  |

|                                |    |   |        |                          |                                               |   |             |
|--------------------------------|----|---|--------|--------------------------|-----------------------------------------------|---|-------------|
| Fragilariopsis_cylindrus_11    | AV | M | TYNVFA | RASPENKIKIVK             | ALQ                                           | S | Q           |
| Fragilariopsis_cylindrus_12    | AV | M | TYNVFA | RASPENKIKIVK             | ALQ                                           | S | Q           |
| Pseudo-nitzschia_multiseriis_3 | AV | M | TYNVFA | RASPENKIKIVK             | ALQ                                           | S | Q           |
| Phaeodactylum_tricornutum_3    | AT | Q | KYNVFA | RASPONKIRIVK             | ALQ                                           | A | E           |
| Micromonas_pusilla_3           | LT | R | TTSVFA | RAKPEDKLEIVK             | SLQ                                           | R | Q           |
| Micromonas_sp_3                | LT | K | TTSVFA | RAKPEDKLEIVK             | SLQ                                           | R | Q           |
| Chlamydomonas_reinhardtii_5    | LL | P | RLRVLA | RSSPEDKLLTVS             | LLK                                           | K | Q           |
| Chlamydomonas_reinhardtii_6    | LL | P | RLRVLA | RSSPEDKLLTVS             | LLK                                           | K | Q           |
| Volvox_carteri_3               | LL | P | KLRVLA | RSSPEDKLLTVS             | LLK                                           | K | Q           |
| Volvox_carteri_4               | LL | P | KLRVLA | RSSPEDKLLTVS             | LLK                                           | K | Q           |
| Volvox_carteri_5               | KM | D | AVRV   | RPGRGGRLKVVRRGKNTTYSWLAS |                                               | Q | A           |
| Chlamydomonas_reinhardtii_7    | KI | N | HVRVLA | RSSPEDKLLQVLR            | LLK                                           | E | M           |
| Chlamydomonas_reinhardtii_8    | LL | P | KLRVLA | RSSPEDKLLTVS             | MLK                                           | Q | H           |
| Volvox_carteri_6               | LL | P | KLRVLA | RSSPEDKLLTVS             | MLK                                           | Q | Q           |
| Ostreococcus_lucimarinus_3     | IA | M | RIRVLA | RSSPSDKLVLCN             | LQR                                           | K | L           |
| Micromonas_sp_4                | VA | V | KIRVLA | RSSPADKMLCN              | LOK                                           | S | L           |
| Selaginella_moellendorffii_5   | IV | P | KIDVLA | RSTPSDKLLLVK             | TLK                                           | S | L           |
| A.thaliana_AT3G21180.1         | VA | K | KITVMG | RSSPNDKLLLVQ             | ALR                                           | K | N           |
| Aquilegia_caerulea_5           | IA | D | KISVMG | RSSPNDKLLLVK             | ALK                                           | R | R           |
| A.thaliana_AT5G57110.2         | IS | D | KISVMG | RSSPNDKLLLVQ             | SLR                                           | R | Q           |
| Oryza_sativa_3                 | AA | E | KISVMG | RSSPNDKLLLVK             | ALR                                           | K | R           |
| Zea_mays_2                     | AA | E | KISVMG | RSSPNDKLLLVK             | ALR                                           | A | R           |
| Zea_mays_3                     | IA | D | KITVMG | RSSPNDKLLLVQ             | CLK                                           | R | R           |
| Zea_mays_4                     | AA | D | KIIVMG | RSSPNDKLLLVQ             | ALK                                           | R | K           |
| Selaginella_moellendorffii_6   | LV | P | KLEVMA | RSSPMDKLLLVK             | TLR                                           | S | M           |
| Selaginella_moellendorffii_7   | IL | P | AIQVMA | RSSPTDKHTLVK             | RLL                                           | E | M           |
| Aquilegia_caerulea_6           | II | P | KIQVMA | RSSPLDKHTLVK             | HLR                                           | T | TF          |
| Medicago_truncatula_3          | LI | P | KIQVMA | RSSPLDKHTLVK             | HLR                                           | T | TF          |
| A.thaliana_AT2G22950.1         | LI | P | KIQVMA | RSSPMDKHTLVK             | QLR                                           | T | TF          |
| A.thaliana_AT4G37640.1         | LI | P | KIQVMA | RSSPMDKHTLVK             | QLR                                           | T | TF          |
| Oryza_sativa_4                 | LI | P | KIQVMA | RSSPLDKHTLVK             | HLR                                           | T | TF          |
| Zea_mays_5                     | LI | P | KIQVMA | RSSPLDKHTLVK             | HLR                                           | T | TF          |
| Oryza_sativa_5                 | LI | P | KIQVMA | RSSPLDKHTLVK             | HLR                                           | T | TF          |
| A.thaliana_AT1G27770.1         | LI | P | KIQVMA | RSSPLDKHTLVK             | HLR                                           | T | TF          |
| Oryza_sativa_6                 | LI | P | KMQVLA | RSSPLDKHTLVK             | HLR                                           | T | AF          |
| Zea_mays_6                     | LI | P | KMQVLA | RSSPLDKHALVK             | YLR                                           | T | TF          |
| Aquilegia_caerulea_7           | LV | P | KIQVMA | RSMPMDKHTLVK             | HLR                                           | T | VI          |
| Oryza_sativa_7                 | LL | P | KIQVIA | RSLPMDKYLVT              | SLK                                           | S | MY          |
| Selaginella_moellendorffii_8   | LI | P | SLQVMA | RSSPTDKHTLVK             | ELR                                           | A | L           |
| Selaginella_moellendorffii_9   | RI | P | KMQILA | RSSPSDKHRLVK             | ELQ                                           | A | M           |
| Oryza_sativa_8                 | IV | D | NIRVMA | RSLPLDKLVLVQ             | RLK                                           | Q | K           |
| Fragilariopsis_cylindrus_13    | IL | P | TLQVLA | RSSPEDKHTLVQ             | RLNG                                          |   |             |
| Pseudo-nitzschia_multiseriis_4 | VL | P | TLQVLA | RSSPEDKHTLVQ             | RLNGGLMPETEEFWLERHPCGRDFDTEKDLLLPGYKEEWSRSRGG | V |             |
| Phaeodactylum_tricornutum_4    | IL | P | RLQVLA | RSSPEDKHTLVQ             | RLNGAASPSTESEWCEAHPNKDFATQRNLLLPGYKDEWAKSRFG  | V |             |
| Thalassiosira_pseudonana_6     | IW | P | HLRVLA | RSSPDDKLLTAH             | GLN                                           | Q | STL         |
| Phaeodactylum_tricornutum_5    | IW | P | HLRVLA | RSSPDDKLLTAH             | GLN                                           | Q | SNLFVDKGLCQ |
| Phaeodactylum_tricornutum_6    | IW | P | RLRVLA | RSSPDDKLLTAH             | GLN                                           | K |             |

|                                 |          |           |                |              |              |           |           |          |         |          |         |
|---------------------------------|----------|-----------|----------------|--------------|--------------|-----------|-----------|----------|---------|----------|---------|
| Skeletonema_marinoi_ABC         | -----GEI | ---AAMTGD | ----GVNDAPALQQ | ----ASIGIAMG | ISGTEVSK     | EAADMVLAD | NFSTIVA   | AAIEEGRS | IYNNMQ  | AFICFL   | IS      |
| Thalassiosira_pseudonana_1      | -----GEI | ---PAMTGD | ----GVNDAPALQQ | ----ASIGVAMG | ISGTEVSK     | EAADMVLAD | NFSTIVA   | AAVEEGR  | CIYANM  | QAFICFL  | IS      |
| Thalassiosira_oceanica_1        | -----DEI | ---SAMTGN | FYQFHC         | VDAPALQQ     | ----ANIGIAMG | ISGTEVSK  | EAADMVLAD | NFSTIVA  | AAVEEGR | CIYANM   | QAFICFL |
| Phaeodactylum_tricornutum_1     | -----DEI | ---PAMTGD | ----GVNDAPALQQ | ----AAIGIAMG | ITGTEVSK     | NAADMILAD | NFSTIVS   | AVEEGR   | RIYSNM  | QAFICFL  | IS      |
| Fragilariopsis_cylindrus_1      | -----NEI | ---PAMTGD | ----GVNDAPALQQ | ----AAIGVAMG | -TGTAVAK     | EADMILAD  | DDFSTIVS  | AVEEGR   | TIYANM  | QAFICFL  | IS      |
| Fragilariopsis_cylindrus_2      | -----NEI | ---PAMTGD | ----GVNDAPALQQ | ----AAIGVAMG | -TGTAVAK     | EADMILAD  | DDFSTIVS  | AVEEGR   | TIYANM  | QAFICFL  | IS      |
| Fragilariopsis_cylindrus_3      | -----NEI | ---PAMTGD | ----GVNDAPALQQ | ----AAIGVAMG | -TGTAVAK     | EADMILAD  | DDFSTIVS  | AVEEGR   | TIYANM  | QAFICFL  | IS      |
| Fragilariopsis_cylindrus_4      | -----NEI | ---PAMTGD | ----GVNDAPALQQ | ----AAIGVAMG | -TGTAVAK     | EADMILAD  | DDFSTIVS  | AVEEGR   | TIYANM  | QAFICFL  | IS      |
| Fragilariopsis_cylindrus_5      | -----NEI | ---PAMTGD | ----GVNDAPALQQ | ----AAIGVAMG | -TGTAVAK     | EADMILAD  | DDFSTIVS  | AVEEGR   | TIYANM  | QAFICFL  | IS      |
| Fragilariopsis_cylindrus_6      | -----NEI | ---PAMTGD | ----GVNDAPALQQ | ----AAIGVAMG | -TGTAVAK     | EADMILAD  | DDFSTIVS  | AVEEGR   | TIYANM  | QAFICFL  | IS      |
| Fragilariopsis_cylindrus_7      | -----NEI | ---PAMTGD | ----GVNDAPALQQ | ----AAIGVAMG | -TGTAVAK     | EADMILAD  | DDFSTIVS  | AVEEGR   | TIYANM  | QAFICFL  | IS      |
| Fragilariopsis_cylindrus_8      | -----NEI | ---PAMTGD | ----GVNDAPALQQ | ----AAIGVAMG | -TGTAVAK     | EADMILAD  | DDFSTIVS  | AVEEGR   | TIYANM  | QAFICFL  | IS      |
| Pseudo-nitzschia_multiseriata_1 | -----GEI | ---AAMTGD | ----GVNDAPALQQ | ----AAIGVAMG | -TGTAVS      | KEADMVLAD | DDFSTIVS  | AVEEGR   | TIYANM  | QAFICFL  | IS      |
| Thalassiosira_pseudonana_2      | -----DEI | ---PAMTGD | ----GVNDAPALQQ | ----ASIGVAMG | ISGTDVAK     | EADMILVDD | NFSTIVD   | AVEEGR   | CIYANM  | QAFINFL  | ITC     |
| Ostreococcus_lucimarinus_1      | -----GDV | ---VAMTGD | ----GVNDAPALKL | ----ADIGIAMG | ITGTEVAK     | EADMVLAD  | NFSTIVE   | AVSEGR   | IYNNMK  | KAFIRYMI | SS      |
| Zea_mays_1                      | -----GEV | ---VAMTGD | ----GVNDAPALKL | ----ADIGVAMG | ITGTEVAK     | EADMVLAD  | NFSTIVA   | AVGEGR   | IYNNMK  | KAFIRYMI | SS      |
| Oryza_sativa_1                  | -----GEV | ---VAMTGD | ----GVNDAPALKL | ----ADIGVAMG | ITGTEVAK     | EADMVLAD  | NFSTIVA   | AVGEGR   | IYNNMK  | KAFIRYMI | SS      |
| Aquilegia_caerulea_1            | -----GEV | ---VAMTGD | ----GVNDAPALKL | ----ADIGIAMG | ITGTEVAK     | EADMVLAD  | NFSTIVA   | AVGEGR   | IYNNMK  | KAFIRYMI | SS      |
| A.thaliana_AT1G07810.1          | -----GEV | ---VAMTGD | ----GVNDAPALKL | ----ADIGVAMG | ISGTEVAK     | EADMVLAD  | NFSTIVA   | AVGEGR   | IYNNMK  | KAFIRYMI | SS      |
| A.thaliana_AT1G07670.1          | -----GEV | ---VAMTGD | ----GVNDAPALKL | ----ADIGIAMG | ITGTEVAK     | EADMVLAD  | NFSTIVA   | AVGEGR   | IYNNMK  | KAFIRYMI | SS      |
| Medicago_truncatula_1           | -----GEV | ---VAMTGD | ----GVNDAPALKL | ----ADIGIAMG | ITGTEVAK     | EADMVLAD  | NFSSIVA   | AVGEGR   | IYNNMK  | KAFIRYMI | SS      |
| Glycine_max_1                   | -----GEV | ---VAMTGD | ----GVNDAPALKL | ----ADIGIAMG | ITGTEVAK     | EADMVLAD  | NFSSIVA   | AVGEGR   | IYNNMK  | KAFIRYMI | SS      |
| Glycine_max_2                   | -----GEV | ---VAMTGD | ----GVNDAPALKL | ----ADIGIAMG | ITGTEVAK     | EADMVLAD  | NFSSIVA   | AVGEGR   | IYNNMK  | KAFIRYMI | SS      |
| Aquilegia_caerulea_2            | -----GEV | ---VAMTGD | ----GVNDAPALKL | ----ADIGIAMG | ITGTEVAK     | EADMVLAD  | NFSTIVS   | AVGEGR   | IYNNMK  | KAFIRYMI | SS      |
| Selaginella_moellendorffii_1    | -----GEV | ---VAMTGD | ----GVNDAPALKL | ----ADIGIAMG | ITGTEVAK     | EADMVLAD  | NFSTIVS   | AVGEGR   | IYNNMK  | KAFIRYMI | SS      |
| Physcomitella_patens_1          | -----GEV | ---VAMTGD | ----GVNDAPALKL | ----ADIGVAMG | ITGTEVAK     | EADMVLAD  | NFSTIVA   | AVGEGR   | IYNNMK  | KAFIRYMI | SS      |
| Physcomitella_patens_2          | -----GEV | ---VAMTGD | ----GVNDAPALKL | ----ADIGVAMG | ITGTEVAK     | EADMVLAD  | NFSTIVA   | AVGEGR   | IYNNMK  | KAFIRYMI | SS      |
| Physcomitella_patens_3          | -----GEV | ---VAMTGD | ----GVNDAPALKL | ----ADIGIAMG | ITGTEVAK     | EADMVLAD  | NFSTIVA   | AVGEGR   | IYNNMK  | KAFIRYMI | SS      |
| Selaginella_moellendorffii_2    | -----GEV | ---VAMTGD | ----GVNDAPALKL | ----ADIGIAMG | ITGTEVAK     | EADMVLAD  | NFSTIVS   | AVGEGR   | IYNNMK  | KAFIRYMI | SS      |
| Glycine_max_3                   | -----GEI | ---VAMTGD | ----GVNDAPALKL | ----ADIGIAMG | ITGTEVAK     | EADMVLAD  | NFSTIVL   | AVGEGR   | IYNNMK  | KSFIRYMI | SS      |
| Glycine_max_4                   | -----GEI | ---VAMTGD | ----GVNDAPALKL | ----ADIGIAMG | ITGTEVAK     | EADMVLAD  | NFSTIVS   | AVGEGR   | IYNNMK  | KSFIRYMI | SS      |
| Aquilegia_caerulea_3            | -----GEI | ---VAMTGD | ----GVNDAPALKL | ----ADIGIAMG | ITGTEVAK     | EADMVLAD  | NFSTIVS   | AVGEGR   | IYNNMK  | KAFIRYMI | SS      |
| A.thaliana_AT4G00900.1          | -----GEI | ---VAMTGD | ----GVNDAPALKL | ----ADIGIAMG | ITGTEVAK     | EADMVLAD  | NFSTIVS   | AVGEGR   | IYNNMK  | KAFIRYMI | SS      |
| Chlamydomonas_reinhardtii_1     | -----GEV | ---TAMTGD | ----GVNDAPALKL | ----ADIGVAMG | ITGTEVAK     | EADMVLAD  | NFSSIVA   | AVGEGR   | IYNNMK  | KAFIRYMI | SS      |
| Volvox_carteri_1                | -----GEV | ---AAMTGD | ----GVNDAPALKL | ----ADIGVAMG | ITGTEVAK     | EADMVLAD  | NFSSIVA   | AVGEGR   | IYNNMK  | KAFIRYMI | SS      |
| Micromonas_pusilla_1            | -----DEI | ---VAMTGD | ----GVNDAPALKL | ----ADIGIAMG | ITGTEVAK     | EADMVLAD  | NFSSIVD   | AVSEGR   | IYNNMK  | KAFIRYMI | SS      |
| Micromonas_sp_1                 | -----DEI | ---VAMTGD | ----GVNDAPALKL | ----ADIGIAMG | ITGTEVAK     | EADMVLAD  | NFSSIVD   | AVSEGR   | IYNNMK  | KAFIRYMI | SS      |
| Selaginella_moellendorffii_3    | -----GEI | ---VAMTGD | ----GVNDAPALKL | ----ADIGIAMG | LSGTEVAK     | EADMVLAD  | DFATIVV   | AVREGR   | IYDNM   | RAFIRYLI | SS      |
| Thalassiosira_oceanica_2        | -----GCV | ---VAMTGD | ----GVNDAPALKQ | ----ADIGIAMG | LTGTEVAK     | EADMVLAD  | NFATIVL   | AVEEGR   | IYNNM   | QAFIRYLI | SS      |
| Thalassiosira_pseudonana_3      | -----GCV | ---VAMTGD | ----GVNDAPALKQ | ----ADIGIAMG | LTGTEVAK     | EADMVLAD  | NFATIVH   | AVEEGR   | IYNNM   | QAFIRYLI | SS      |
| Pseudo-nitzschia_multiseriata_2 | -----GEV | ---PAMTGD | ----GVNDAPALKQ | ----ASIGIAMG | ISGTEVAK     | EADMILAD  | NFATIVS   | AVEEGR   | IYSNM   | KAFIRYMI | SS      |
| Fragilariopsis_cylindrus_9      | -----DEV | ---PAMTGD | ----GVNDAPALKQ | ----ASIGIAMG | ISGTEVAK     | EADMILAD  | NFATIVD   | AVEEGR   | IYSNM   | KAFIRYMI | SS      |
| Fragilariopsis_cylindrus_10     | -----DEV | ---PAMTGD | ----GVNDAPALKQ | ----ASIGIAMG | ISGTEVAK     | EADMILAD  | NFATIVD   | AVEEGR   | IYSNM   | KAFIRYMI | SS      |
| Aquilegia_caerulea_4            | -----NEV | ---VAMTGD | ----GVNDAPALKK | ----ADIGIAMG | -SGTAVAK     | SADMVLAD  | NFASIVA   | AVGEGR   | IYNNM   | KAFIRYMI | SS      |
| Glycine_max_5                   | -----NEV | ---VAMTGD | ----GVNDAPALKK | ----ADIGIAMG | -SGTAVAK     | SADMVLAD  | NFASIVA   | AVGEGR   | IYNNM   | KAFIRYMI | SS      |
| Medicago_truncatula_2           | -----NEV | ---VAMTGD | ----GVNDAPALKK | ----ADIGIAMG | -SGTAVAK     | SADMVLAD  | NFASIVA   | AVGEGR   | IYNNM   | KAFIRYMI | SS      |
| A.thaliana_AT1G10130.1          | -----NEV | ---VAMTGD | ----GVNDAPALKK | ----ADIGIAMG | -SGTAVAK     | SADMVLAD  | NFASIVA   | AVGEGR   | IYNNM   | KAFIRYMI | SS      |
| Oryza_sativa_2                  | -----NEV | ---VAMTGD | ----GVNDAPALKK | ----ADIGIAMG | -SGTAVAK     | SADMVLAD  | NFATIVA   | AVSEGR   | IYNNM   | KAFIRYMI | SS      |
| Selaginella_moellendorffii_4    | -----KEV | ---VAMTGD | ----GVNDAPALKQ | ----ADIGIAMG | -SGTAVAK     | SADMVLAD  | NFATIVV   | AVGEGR   | IYNNM   | KAFIRYMI | SS      |
| Micromonas_pusilla_2            | -----GHV | ---VAMTGD | ----GVNDAPALKR | ----ADIGIAMG | -SGTAVAK     | SSADMVLAD | NFATIVS   | AVGEGR   | IYNNM   | KAFIRYMI | SS      |
| Micromonas_sp_2                 | -----GOV | ---VAMTGD | ----GVNDAPALRL | ----ADIGIAMG | -SGTAVAK     | NAADMVLAD | NFATIVT   | AVEGR    | GFNNT   | KQFVRYMI | SS      |
| Volvox_carteri_2                | -----GHV | ---VAMTGD | ----GVNDAPALAR | ----ADIGVAMG | -SGTAVAK     | GAADMVLAD | NFATIVA   | AVGEGR   | IYNNM   | KAFIRYMI | SS      |
| Chlamydomonas_reinhardtii_2     | -----GHV | ---VAMTGD | ----GVNDAPALSR | ----ADIGVAMG | -SGTAVAK     | GAADMVLAD | NFATIVS   | AVGEGR   | IYNNM   | KAFIRYMI | SS      |
| Dunaliella_salina_1             | -----GHV | ---VAMTGD | ----GVNDAPALLR | ----ADIGIAMG | -SGTAVAK     | HAADMVLAD | NFATIVFA  | -----    | -----   | -----    | -----   |
| Ostreococcus_lucimarinus_2      | -----DNI | ---VAMTGD | ----GVNDAPALKC | ----ADIGIAMG | -SGTAVAK     | GAADMVLAD | NFSTIVE   | AVGEGR   | IYNNM   | KAFIRYMI | SS      |
| Phaeodactylum_tricornutum_2     | -----GDI | ---VAMTGD | ----GVNDAPALKG | ----ADIGIAMG | LTGTDVAK     | EADMVLAD  | DFRTITMA  | IAEGK    | GIFFL   | AFYMLV   | SS      |
| Chlamydomonas_reinhardtii_3     | -----GOT | ---AAMTGD | ----GVNDAPALKA | ----ADVGVAMG | ITGTDVSK     | EAKMVLAD  | NFATIVA   | AVREGRR  | VWDIRK  | ILIFNL   | PV      |
| Chlamydomonas_reinhardtii_4     | -----GOT | ---AAMTGD | ----GVNDAPALKA | ----ADVGVAMG | ITGTDVSK     | EAKMVLAD  | NFATIVA   | AVREGRR  | VWDIRK  | ILIFNL   | PV      |
| Thalassiosira_pseudonana_4      | -----GOV | ---SSMTGD | ----GVNDAPALKA | ----ANMGVAMG | KEGTDVARE    | ASEMILAD  | NFATIVFA  | VKQGR    | VWDIRK  | VLLVNT   | PI      |
| Thalassiosira_pseudonana_5      | -----GOV | ---TSMTGD | ----GVNDAPALKA | ----ANMGVAMG | KEGTDVARE    | ASEMILAD  | NFATIVFA  | VKQGR    | VWDIRK  | VLLVNT   | PI      |

|                                |                                                                                                                                          |
|--------------------------------|------------------------------------------------------------------------------------------------------------------------------------------|
| Fragilariopsis_cylindrus_11    | -----GEV--ASMTGD-----GVNDAPALKA-----ANMGVAMGKEGTDVAREAADMILADNFATILTAVKEGRVVDNLRKVLMLINTPI                                               |
| Fragilariopsis_cylindrus_12    | -----GEV--ASMTGD-----GVNDAPALKA-----ANMGVAMGKEGTDVAREAADMILADNFATILTAVKEGRVVDNLRKVLMLINTPI                                               |
| Pseudo-nitzschia_multiseriis_3 | -----GEV--ASMTGD-----GVNDAPALKA-----ANMGVAMGLEGTDVAREAAEMILADNFATILSAVKEGRVVDNLRKVLMLINTPI                                               |
| Phaeodactylum_tricornutum_3    | -----GEV--CAMTGD-----GVNDAPALKA-----ADMGVAMGKEGTDVAREAAEMILADNFATIIISAVREGRVVDNLRKVLMLINTPI                                              |
| Micromonas_pusilla_3           | -----GWV--CAMTGD-----GVNDAPALQR-----ADIGVAMGLEGTEVAKGASDMILTDDNFCSIVKAIKGRITIIYAGIQKFVAFIMSV                                             |
| Micromonas_sp_3                | -----GFV--CAMTGD-----GVNDAPALNR-----ADIGVAMGLEGTEVAKGASDMILTDDNFCSIVKAIKGRITIIYAGIQKFVAFIMSV                                             |
| Chlamydomonas_reinhardtii_5    | -----GEI--VAVTGD-----GTNDAPALKE-----SDVGLAMGIAGTEVAKEAADI I I L D D N F S S I V K S V L W G R A V Y M N I R K F L V F O L S I            |
| Chlamydomonas_reinhardtii_6    | -----GEV--VAVTGD-----GTNDAPALKE-----SDVGLAMGIAGTEVAKEAADI I I L D D N F S S I V K S V L W G R T V Y M N I R K F L V F O L S I            |
| Volvox_carteri_3               | -----GEV--VAVTGD-----GTNDAPALKE-----SDVGLAMGIAGTEVAKEAADI I I L D D N F S S I V K S V L W G R C V Y M N I R K F L V F O L S I            |
| Volvox_carteri_4               | -----GEV--VAVTGD-----GTNDAPALKE-----SDVGLAMGIAGTEVAKEAADI I I L D D N F S S I V K S V L W G R C V Y M N I R K F L V F O L S I            |
| Volvox_carteri_5               | -----PDSTFGVQSNGG-----GGPRGERMDEGSGTKGGDCALGEADGGTEVSKAADI I I L D D N F S S I V K S V L W G R S V F A N I R K F L O F O L T V           |
| Chlamydomonas_reinhardtii_7    | -----GDV--VAVTGD-----GTNDAPALKE-----SDVGLAMGIAGTEVAKEAADI I I L D D N F S S I V K S V K W G R S V F A N I R K F L O F O L T V            |
| Chlamydomonas_reinhardtii_8    | -----GDV--VAVTGD-----GTNDAPALKE-----SDVGLAMGIAGTEVAKEAADI I I L D D N F S S I V K S V L W G R S V F T N I R K F L M F O L T V            |
| Volvox_carteri_6               | -----GEV--VAVTGD-----GTNDAPALKE-----SDVGLAMGIAGTEVAKEAADI I I L D D N F S S I V K S V L W G R S V F T N I R K F L M F O L T V            |
| Ostreococcus_lucimarinus_3     | -----GEV--VAVTGD-----GTNDAPALKD-----ADVGFALGIAGTEIAKEACDI I I L D D N I K S M A K A V L W G R N V Y Q S I R K F L O F O L V V            |
| Micromonas_sp_4                | -----GEV--VSVTGD-----GTNDAPALKE-----ADVGFALGIAGTEIAKEACDI I I L D D N I Q S M A K A V L W G R N V F Q S I R K F L O F O L V V            |
| Selaginella_moellendorffii_5   | -----NEI--VAVTGD-----GTNDAPALRE-----AHIGLSMGIQTEVAKESSDI I I L D D N F A S V V K V V H W G R S V Y A N I Q K F I Q F O L T V             |
| A.thaliana_AT3G21180.1         | -----GDV--VAVTGD-----GTNDAPALHE-----ADIGLSMGIQTEVAKESSDI I I L D D N F A S V V K V V R W G R S V Y A N I Q K F I Q F O L T V             |
| Aquilegia_caerulea_5           | -----GHV--VAVTGD-----GTNDAPALHE-----ADIGLSMGIQTEVAKESSDI I I L D D N F S S V V K V V R W G R S V Y A N I Q K F I Q F O L T V             |
| A.thaliana_AT5G57110.2         | -----GHV--VAVTGD-----GTNDAPALHE-----ADIGLSMGIQTEVAKESSDI I I L D D N F A S V V K V V R W G R S V Y A N I Q K F I Q F O L T V             |
| Oryza_sativa_3                 | -----GHV--VAVTGD-----GTNDAPALHE-----ADIGLSMGIQTEVAKESSDI I I L D D N F A S V V R V V R W G R S V Y A N I Q K F I Q F O L T V             |
| Zea_mays_2                     | -----GHV--VAVTGD-----GTNDAPALHE-----ADIGLSMGIQTEVAKESSDI I I L D D N F A S V V R V V R W G R S V Y A N I Q K F I Q F O L T V             |
| Zea_mays_3                     | -----GHV--VAVTGD-----GTNDAPALHE-----ADIGLSMGIQTEVAKESSDI I I L D D D F T S V V K V V R W G R S V Y A N I Q K F I Q F O L T V             |
| Zea_mays_4                     | -----GHV--VAVTGD-----GTNDAPALHE-----ADIGLSMGIQTEVAKESSDI I I L D D D F T S V V K V V R W G R S V Y A N I Q K F I Q F O L T V             |
| Selaginella_moellendorffii_6   | -----NDV--VAVTGD-----GTNDAPALHE-----ADIGLSMGIQTEVAKESSDI I I L D D N F A S V V K V V R W G R S V Y A N I Q K F I Q F O L T V             |
| Selaginella_moellendorffii_7   | -----GEI--VAVTGD-----GTNDAPALHE-----ASIGLSMGIQTEVAKESSDI I I M D D D F A S I V K V V R W G R A V Y A N I Q K F V Q F O C T V             |
| Aquilegia_caerulea_6           | -----GEV--VAVTGD-----GTNDAPALHE-----ADIGLSMGIQTEVAKESSDI I I L D D N F S T I V T V A K W G R S V Y I N I Q K F V Q F O L T V             |
| Medicago_truncatula_3          | -----GEV--VAVTGD-----GTNDAPALHE-----ADIGLSMGIQTEVAKESSDI I I L D D N F S T I V T V A K W G R S V Y I N I Q K F V Q F O L T V             |
| A.thaliana_AT2G22950.1         | -----DEV--VAVTGD-----GTNDAPALHE-----ADIGLSMGIQTEVAKEIADVI I I L D D N F S T I V T V A K W G R S V Y I N I Q K F V Q F O L T V            |
| A.thaliana_AT4G37640.1         | -----DEV--VAVTGD-----GTNDAPALHE-----ADIGLSMGIQTEVAKEIADVI I I L D D N F S T I V T V A K W G R S V Y I N I Q K F V Q F O L T V            |
| Oryza_sativa_4                 | -----DEV--VAVTGD-----GTNDAPALHE-----ADIGLSMGIQTEVAKEIADVI I I L D D N F S T I V T V A K W G R S V Y I N I Q K F V Q F O L T V            |
| Zea_mays_5                     | -----DEV--VAVTGD-----GTNDAPALHE-----ADIGLSMGIQTEVAKEIADVI I I L D D N F S T I V T V A K W G R S V Y I N I Q K F V Q F O L T V            |
| Oryza_sativa_5                 | -----NEV--VAVTGD-----GTNDAPALHE-----ADIGLSMGIQTEVAKEIADVI I I L D D N F S T I V T V A K W G R S V Y V N I Q K F V Q F O L T V            |
| A.thaliana_AT1G27770.1         | -----QEV--VAVTGD-----GTNDAPALHE-----ADIGLSMGIQTEVAKEIADVI I I L D D N F S T I V T V A K W G R S V Y I N I Q K F V Q F O L T V            |
| Oryza_sativa_6                 | -----NEV--VAVTGD-----GTNDAPALRE-----ADIGLSMGIQTEVAKEIADVI I I L D D N F S T I V T V A K W G R S V Y V N I Q K F V Q F O L T V            |
| Zea_mays_6                     | -----NEV--VAVTGD-----GTNDAPALRE-----ADIGLSMGIQTEVAKEIADVI I I L D D N F S T I V T V A K W G R S V Y V N I Q K F V Q F O L T V            |
| Aquilegia_caerulea_7           | -----GEV--VAVTGD-----GTNDAPALHE-----SDIGLAMGIAGTEVAKEIADVI I I M D D N F S T I V N V A K W G R A V Y I N I Q K F V Q F O L T V           |
| Oryza_sativa_7                 | -----QEV--VAVTGD-----GTNDAPALHE-----SDIGLAMGIAGTEVAKEIADVI I I M D D N F S T I V N V A K W G R A V Y I N I Q K F V Q F O L T V           |
| Selaginella_moellendorffii_8   | -----DEV--VSVTGD-----GTNDAPALHE-----ADVGLAMGIAGTEVAKEIADVI I I L D D K F N T I V V V A K W G R S V Y T N I Q K F V Q F O L T V           |
| Selaginella_moellendorffii_9   | -----GEV--VGVTDG-----GTNDAPALRE-----ADIGLSMGIQTEVAKESSDI I I L D D N F A S I V N V A L W G R S V Y T N I Q K F V Q F O A T V             |
| Oryza_sativa_8                 | -----GHV--VAVTGD-----GTNDAPALKE-----ADVGLSMGLSGTDVAKNASDI I I M D D K F S S I V K A V L W G R S V Y D N I R K F L O F O L T V            |
| Fragilariopsis_cylindrus_13    | -----GEV--VGVTDG-----GTNDGPALKA-----ADVGLSMGLSGTDVAKNASDI I I M D D K F S S I V K A V L W G R S V Y D N I R K F L O F O L T V            |
| Pseudo-nitzschia_multiseriis_4 | -----GEV--VGVTDG-----GTNDGPALKA-----ADVGLSMGLSGTDVAKNASDI I I M D D K F S S I V K A V L W G R S V F D N I R K F L O F O L T V            |
| Phaeodactylum_tricornutum_4    | -----GEV--VGVTDG-----GTNDAPALKA-----ADVGLSMGLSGTDVAKNASDI I I M D D N F A S I V R A V L W G R S V F D N I R K F L O F O L T V            |
| Thalassiosira_pseudonana_6     | -----EDNIIIFPDROV--VAMTGD-----GTNDAPALKR-----ADIGFAMGIAGTQIAKDAADI I I L D D N F A S I V T A A K W G R N Y A S I Q K F L O F O L T V     |
| Phaeodactylum_tricornutum_5    | -----KYNLEDGINIFPDROV--IAMTGD-----GTNDAPALKR-----ADIGFAMGIAGTQIAKDAADI I I L D D N F A S I V T A A K W G R N Y A S I Q K F L O F O L T V |
| Phaeodactylum_tricornutum_6    | -----EGIKVFPDROV--IAMTGD-----GTNDAPALKR-----ADIGFAMGIAGTQIAKDAADI I I L D D N F A S I V T A A K W G R N Y A S I Q K F L O F O L T V      |

|                                |                     |       |                                          |                                      |
|--------------------------------|---------------------|-------|------------------------------------------|--------------------------------------|
| Skeletonema_marinoi_ABC        | NIGETIAAILFAAVCGFPE | ----- | PLSAMHLLWVNLVTDGPPATALGFNPPSPDVMQKPR     | -----                                |
| Thalassiosira_pseudonana_1     | NIGETIAAILISAVCGFPE | ----- | PLSAMHLLWVNLVTDGPPATALGFNPPAPDVMSQKPR    | -----                                |
| Thalassiosira_oceanica_1       | NIGETIAAILLSTLCGFPE | ----- | PLSAMHLLWVNLVTDGPPATALGFNPPAPDVMSQKPR    | -----                                |
| Phaeodactylum_tricornutum_1    | NIGETICAIFFATLGFPE  | ----- | PLTAMHLLWVNLVTDGPPATALGFNPPAPDLMEQPPR    | -----                                |
| Fragilariopsis_cylindrus_1     | NIGETICAIFFATLGFPE  | ----- | PLTAMHLLWVNLVTDGPPATALGFNPPPLPNIMKQPPR   | -----                                |
| Fragilariopsis_cylindrus_2     | NIGETICAIFFATLGFPE  | ----- | PLTAMHLLWVNLVTDGPPATALGFNPPPLPNIMKQPPR   | -----                                |
| Fragilariopsis_cylindrus_3     | NIGETICAIFFATLGFPE  | ----- | PLTAMHLLWVNLVTDGPPATALGFNPPPLPNIMKQPPR   | -----                                |
| Fragilariopsis_cylindrus_4     | NIGETICAIFFATLGFPE  | ----- | PLTAMHLLWVNLVTDGPPATALGFNPPPLPNIMKQPPR   | -----                                |
| Fragilariopsis_cylindrus_5     | NIGETICAIFFATLGFPE  | ----- | PLTAMHLLWVNLVTDGPPATALGFNPPPLPNIMKQPPR   | -----                                |
| Fragilariopsis_cylindrus_6     | NIGETICAIFFATLGFPE  | ----- | PLTAMHLLWVNLVTDGPPATALGFNPPPLPNIMKQPPR   | -----                                |
| Fragilariopsis_cylindrus_7     | NIGETICAIFFATLGFPE  | ----- | PLTAMHLLWVNLVTDGPPATALGFNPPPLPNIMKQPPR   | -----                                |
| Fragilariopsis_cylindrus_8     | NIGETICAIFFATLGFPE  | ----- | PLTAMHLLWVNLVTDGPPATALGFNPPPLPNIMKQPPR   | -----                                |
| Pseudo-nitzschia_multiseries_1 | NIGETICAIFFATLLGFPE | ----- | PLTAMHLLWVNLVTDGPPATALGFNPPSPNSMKEKPR    | -----                                |
| Thalassiosira_pseudonana_2     | NIGEVIGVFLATILGFPE  | ----- | LLTPLHLLWVNLVTDGPPATALGFNPPGPGVMAQKPR    | -----                                |
| Ostreococcus_lucimarinus_1     | NVGEVVSIFLTAALGMPE  | ----- | GLVPVQLLWVNLVTDGPPATALGFNPPDKIMTKPPR     | -----                                |
| Zea_mays_1                     | NIGEVASIFLTSALGIPE  | ----- | GLIPVQLLWVNLVTDGPPATALGFNPPDKIMKKPPR     | -----                                |
| Oryza_sativa_1                 | NIGEVASIFLTSALGIPE  | ----- | GLIPVQLLWVNLVTDGPPATALGFNPPDKIMKKPPR     | -----                                |
| Aquilegia_caerulea_1           | NIGEVASIFLTAALGIPE  | ----- | GLIPVQLLWVNLVTDGPPATALGFNPPDRDIMKKPPR    | -----                                |
| A.thaliana_AT1G07810.1         | NIGEVASIFLTAALGIPE  | ----- | GMIPVQLLWVNLVTDGPPATALGFNPPDKIMKKPPR     | -----                                |
| A.thaliana_AT1G07670.1         | NIGEVASIFLTAALGIPE  | ----- | GMIPVQLLWVNLVTDGPPATALGFNPPDKIMKKPPR     | -----                                |
| Medicago_truncatula_1          | NIGEVASIFLTAALGIPE  | ----- | GLIPVQLLWVNLVTDGPPATALGFNPPDKIMKKPPR     | -----                                |
| Glycine_max_1                  | NIGEVASIFLTAALGIPE  | ----- | GLIPVQLLWVNLVTDGPPATALGFNPPDKIMKKPPR     | -----                                |
| Glycine_max_2                  | NIGEVASIFLTAALGIPE  | ----- | GLIPVQLLWVNLVTDGPPATALGFNPPDKIMKKPPR     | -----                                |
| Aquilegia_caerulea_2           | NIGEVASIFLTAALGIPE  | ----- | GLIPVQLLWVNLVTDGPPATALGFNPPDKIMKKPPR     | -----                                |
| Selaginella_moellendorffii_1   | NIGEVASIFLTAALGMPE  | ----- | GLTPVQLLWVNLVTDGPPATALGFNPPDVIDIMRKKPPR  | -----                                |
| Physcomitella_patens_1         | NIGEVASIFMNTAALGMPE | ----- | GLVPVQLLWVNLVTDGPPATALGFNPPDLDIMQKPPR    | -----                                |
| Physcomitella_patens_2         | NIGEVASIFMNTAALGMPE | ----- | GLVPVQLLWVNLVTDGPPATALGFNPPDLDIMQKPPR    | -----                                |
| Physcomitella_patens_3         | NMGEVASIFLTAALGLPE  | ----- | GLIPVQLLWVNLVTDGPPATALGFNPPDKIMKKPPR     | -----                                |
| Selaginella_moellendorffii_2   | NIGEVASIFLTAALGMPE  | ----- | GLIPVQLLWVNLVTDGPPATALGFNPPDLGIMKKPPR    | -----                                |
| Glycine_max_3                  | NIGEVISIFLTAALGIPE  | ----- | CMISVQLLWVNLVTDGPPATALGFNPPADVIDIMQKPPR  | -----                                |
| Glycine_max_4                  | NVGEVISIFLTAALGIPE  | ----- | CMIPVQLLWVNLVTDGPPATALGFNPPADVIDIMQKPPR  | -----                                |
| Aquilegia_caerulea_3           | NVGEVISIFLTAALGIPE  | ----- | CLIPVQLLWVNLVTDGPPATALGFNPPADVIDIMRKKPPR | -----                                |
| A.thaliana_AT4G00900.1         | NVGEVISIFLTAALGIPE  | ----- | CMIPVQLLWVNLVTDGPPATALGFNPPADVIDIMRKKPPR | -----                                |
| Chlamydomonas_reinhardtii_1    | NIGEVASIFLTAALGLPE  | ----- | GLIPVQLLWVNLVTDGPPATALGFNPPDKIMSKPPR     | -----                                |
| Volvox_carteri_1               | NIGEVASIFLTAALGLPE  | ----- | GLIPVQLLWVNLVTDGPPATALGFNPPDKIMSRPPR     | -----                                |
| Micromonas_pusilla_1           | NVGEVVSIFLTAALGMPE  | ----- | GLIPVQLLWVNLVTDGPPATALGFNPPDVIDIMTKTPR   | -----                                |
| Micromonas_sp_1                | NVGEVVSIFLTAALGMPE  | ----- | GLIPVQLLWVNLVTDGPPATALGFNPPDVIDIMTKKPR   | -----                                |
| Selaginella_moellendorffii_3   | NIGEVAIFLTAALGMPE   | ----- | GLIPVQLLWVNLVTDGPPATALGFNPPDVIDIMDRPPR   | -----                                |
| Thalassiosira_oceanica_2       | NIGEVAIFLTAALGLPE   | ----- | GLIPVQLLWVNLVTDGPPATALGFNPPDADIMKKLPR    | -----                                |
| Thalassiosira_pseudonana_3     | NIGEVAIFLTAALGMPE   | ----- | GLIPVQLLWVNLVTDGPPATALGFNPPADKDIMKKLPR   | -----                                |
| Pseudo-nitzschia_multiseries_2 | NIGEVSIFLTSALGIPE   | ----- | GLIPVQLLWVNLVTDGPPATALGFNPPDPDVMLKPPR    | -----                                |
| Fragilariopsis_cylindrus_9     | NIGEVSIFLTSALGIPE   | ----- | GLIPVQLLWVNLVTDGPPATALGFNPPDPDVMLKPPR    | -----                                |
| Fragilariopsis_cylindrus_10    | NIGEVSIFLTSALGIPE   | ----- | GLIPVQLLWVNLVTDGPPATALGFNPPDPDVMLKPPR    | -----                                |
| Aquilegia_caerulea_4           | NIGEVCIFVAAVLGIPE   | ----- | TLVPVQLLWVNLVTDGLPATALGFNPKQSDVMKAKPR    | -----                                |
| Glycine_max_5                  | NIGEVCIFVAAVLGIPE   | ----- | TLAPVQLLWVNLVTDGLPATALGFNPKQSDVMRAKPR    | -----                                |
| Medicago_truncatula_2          | NIGEVCIFVAAVLGIPE   | ----- | TLAPVQLLWVNLVTDGLPATALGFNPKQSDVMKVKPR    | -----                                |
| A.thaliana_AT1G10130.1         | NIGEVCIFVAAVLGIPE   | ----- | TLAPVQLLWVNLVTDGLPATALGFNPKQSDVMKAKPR    | -----                                |
| Oryza_sativa_2                 | NIGEVCIFVAAVLGMPE   | ----- | TLVPVQLLWVNLVTDGLPATALGFNPKQSDVIMTVKPR   | LHHSATTIIRWLTDAHGKQCFGLAFIVDMGVGDGLD |
| Selaginella_moellendorffii_4   | NIGEVCIFVAALGLPE    | ----- | TLIPVQLLWVNLVTDGLPATALGFNPKQDRNVMMAKPR   | -----                                |
| Micromonas_pusilla_2           | NIGEVCIFIAAALGMPE   | ----- | TLCPVQLLWVNLVTDGLPATALGFNPKPDRDIMRARR    | -----                                |
| Micromonas_sp_2                | NIGEVCIFIAAALGLPE   | ----- | TLCPVQLLWVNLVTDGLPATALGFNPKPEQDIMORRR    | -----                                |
| Volvox_carteri_2               | NIGEVAIFVAALLGVPE   | ----- | VLTPVQLLWVNLVTDGLPATALGFNPKPDKIMAVRPR    | -----                                |
| Chlamydomonas_reinhardtii_2    | NIGEVAIFVAALLGVPE   | ----- | VLTPVQLLWVNLVTDGLPATALGFNRPDKIMSRPPR     | -----                                |
| Dunaliella_salina_1            | --GGVV              | ----- | -----                                    | -----                                |
| Ostreococcus_lucimarinus_2     | NIGEVCIFIAAALGFPE   | ----- | TLVPVQLLWVNLVTDGLPATALGFNRPADGIMRQPR     | -----                                |
| Phaeodactylum_tricornutum_2    | SFAALTMASIAATAFGLPS | ----- | PLNATQILWINILMDGPPAOSLGVPEVDEKILRAKPR    | -----                                |
| Chlamydomonas_reinhardtii_3    | NLAQGFSVLWSYIILSLDN | ----- | VLPTALQVLLVNLITSVTLGLALAAEPPEPDIMERQPR   | -----                                |
| Chlamydomonas_reinhardtii_4    | NLAQGFSVLYSYIILGFKD | ----- | VLPTALQVLLVNLITSVTLGLALAAEPPEPDIMERQPR   | -----                                |
| Thalassiosira_pseudonana_4     | NNSQGLSVLVGLVRLPN   | ----- | TPITTIQILYSNFCIVTLGFVCAIEPAEDGIMALPPR    | -----                                |
| Thalassiosira_pseudonana_5     | NNSQGLCVFFGMLVRLPN  | ----- | TPITTIQILYSNFCIVTLGFVCAIEPAEDGIMALPPR    | -----                                |

|                                |                                                                   |       |
|--------------------------------|-------------------------------------------------------------------|-------|
| Fragilariopsis_cylindrus_11    | NNAQGLSVLFGIFCGFSRGESAFDGVILTSIQVLYCNLICAVTLGFVAAVEPAEDGIMDVPPR   | ----- |
| Fragilariopsis_cylindrus_12    | NNAQGLSVLFGIFCGFSRGESAFDGVILTSIQVLYCNLICAVTLGFVAAVEPAEDGIMDVPPR   | ----- |
| Pseudo-nitzschia_multiseriis_3 | NNAQGLSVLFGIICGFSRGTQNDKVIILTAIQVLYCNLICAVTLGFVAAVEPAEAGIMDVPPR   | ----- |
| Phaeodactylum_tricornutum_3    | NNAQGLSVLFGIFLFLGLKE-----TPLSSIQVLYCNLICAVTLGFVAAVEPAEDGIMELEPR   | ----- |
| Micromonas_pusilla_3           | HFAEVVQIFLFCIVSSIPV-----MROPLQILFLILVTDLPPSIALGFEPGEDLTMKRSPR     | ----- |
| Micromonas_sp_3                | HFAEVLQIFLFCIVSSIPV-----MROPLQILFLILVTDLPPSIALGFEPGEALTMKRAPR     | ----- |
| Chlamydomonas_reinhardtii_5    | NLVAMISAAVGALYGGVP-----PLNVQLLWVNMIMDTLAALALATEDPYPELLDDKPH       | ----- |
| Chlamydomonas_reinhardtii_6    | NLVAMISAAVGALYGGVP-----PLNVQLLWVNMIMDTLAALALATENPYPELLDEMPH       | ----- |
| Volvox_carteri_3               | NLVAMISAAVGALYGGVP-----PLNVQLLWVNMIMDTLAALALATEDPYPELLQDTPH       | ----- |
| Volvox_carteri_4               | NLVAMISAAVGALYGGVP-----PLNVQLLWVNMIMDTLAALALATEDPYPELLQDTPH       | ----- |
| Volvox_carteri_5               | NFVALVTAFVGAAGGHE-----PLNQLLWVNLIMDTMGALALATEDPHALLLQRPN          | ----- |
| Chlamydomonas_reinhardtii_7    | NLVALVTAFVGAAGGHE-----PLNQLLWVNLIMDTMGALALATEPHPTLLLQRPN          | ----- |
| Chlamydomonas_reinhardtii_8    | NFVALVIAFFGAVIGGQE-----PLNVQLLWVNLIMDTMGALALATEDPNPELLLMKPY       | ----- |
| Volvox_carteri_6               | NFVALVIAFFGAVIDGHE-----PLNVQLLWVNLIMDTMGALALATEDPNPELLLMKPY       | ----- |
| Ostreococcus_lucimarinus_3     | NVVALVSLNLIAAIAIGIKE-----LPLAAVPLLWVNMIMDSMGALALATEPPSPPELMKRPKPF | ----- |
| Micromonas_sp_4                | NVVALVSLNFISSAAGITE-----LPLAAVPLLWVNMIMDSMGALALATEPPSPPHLMERKPF   | ----- |
| Selaginella_moellendorffii_5   | NLAALSTNLVAAAGRSQENV-----PLNTVQLLWVNLIMDTLGAALALATEPPTTEEMMERAPI  | ----- |
| A.thaliana_AT3G21180.1         | NVAALIINVVAAMSSGDV-----PLKAVQLLWVNLIMDTLGAALALATEPPTDHLMHRTPV     | ----- |
| Aquilegia_caerulea_5           | NVAALIINVVAAVTGEV-----PLNAVQLLWVNLIMDTLGAALALATEPPTDHLMHRSPV      | ----- |
| A.thaliana_AT5G57110.2         | NVAALVINVVAAISSGDV-----PLTAVQLLWVNLIMDTLGAALALATEPPTDHLMGPPV      | ----- |
| Oryza_sativa_3                 | NVAALIINVVAAVSSGNV-----PLNAVQLLWVNLIMDTLGAALALATEPPTDHLMQRPV      | ----- |
| Zea_mays_2                     | NVAALIINVVAAVSSGNV-----PLNAVQLLWVNLIMDTLGAALALATEPPTNHLMERPPV     | ----- |
| Zea_mays_3                     | NVAALVINVIAAVSSGDV-----PLNAVELLWVNLIMDTLGAALALATEPPTDNLMKRHPV     | ----- |
| Zea_mays_4                     | NVAALVINVVAAVSSGDV-----PLNAVELLWVNLIMDTLGAALALATEPPTDNLMKRNPV     | ----- |
| Selaginella_moellendorffii_6   | NVVALVNLNVAAAKSSQV-----PLTAVQLLWVNLIMDTLGAALALATEPPTDDLMDRPPV     | ----- |
| Selaginella_moellendorffii_7   | NAVALMLNFISALSEGAA-----PLTAVQLLWVNLIMDTLGAALALATEPPNDAVMYRPI      | ----- |
| Aquilegia_caerulea_6           | NVVALIVNFSSACLTGSA-----PLTAVQLLWVNMIMDTLGAALALATEPPNDELMKRTPV     | ----- |
| Medicago_truncatula_3          | NIVALIVNFSSACLTGTA-----PLTAVQLLWVNMIMDTLGAALALATEPPNDDLKRAPV      | ----- |
| A.thaliana_AT2G22950.1         | NVVALIVNFSSACLTGSA-----PLTAVQLLWVNMIMDTLGAALALATEPPNDELKRPV       | ----- |
| A.thaliana_AT4G37640.1         | NVVALVNFSSACLTGSA-----PLTAVQLLWVNMIMDTLGAALALATEPPNDELKRLPV       | ----- |
| Oryza_sativa_4                 | NVVALIVNFSSACLTGSA-----PLTAVQLLWVNMIMDTLGAALALATEPPNDELKRTPV      | ----- |
| Zea_mays_5                     | NVVALVNFSSACLTGSA-----PLTAVQLLWVNMIMDTLGAALALATEPPNDELKRTPV       | ----- |
| Oryza_sativa_5                 | NVVALVNFSSACFTGNA-----PLTAVQLLWVNMIMDTLGAALALATEPPNDDLKREP        | ----- |
| A.thaliana_AT1G27770.1         | NVVALIVNFSSACLTGNA-----PLTAVQLLWVNMIMDTLGAALALATEPPNDDLKRSVP      | ----- |
| Oryza_sativa_6                 | NVVALVNFSSACFTGDA-----PLTAVQLLWVNMIMDTLGAALALATEPPNNLKKAPV        | ----- |
| Zea_mays_6                     | NVVALVNFSSACFTGDA-----PLTAVQLLWVNMIMDTLGAALALATEPPDDNLMKSPV       | ----- |
| Aquilegia_caerulea_7           | NVVALMLNFVSACLSGSA-----PLTAVQLLWVNMIMDTLGAALALATEPPNDRMLQKPPV     | ----- |
| Oryza_sativa_7                 | NIVALIVNFVSACIIGSA-----PLTAVQLLWVNMIMDTLGAALALATEPPNDEMCKRPV      | ----- |
| Selaginella_moellendorffii_8   | NLVALVNFSSACITGTA-----PLTAVQLLWVNLIMDTLGAALALATEPPTDDLKRTPV       | ----- |
| Selaginella_moellendorffii_9   | NLVALALNFSSACSTGDV-----PLTVIQLLWVNLIMDTLGAALALATESPHAGLMKRPV      | ----- |
| Oryza_sativa_8                 | NVAALVNFVSACITGRM-----PLTTVQLLWVNLIMDTMGALALATEDTPTAGLMRRPPI      | ----- |
| Fragilariopsis_cylindrus_13    | NVVALTITFLSALVGYDP-----PLNAIMMLWVNLIMDTMGALALGTEPPKLELLDRPPY      | ----- |
| Pseudo-nitzschia_multiseriis_4 | NVVALTITFLSALVGYDP-----PLNAVMMMLWVNLIMDTMGALALGTEPPKLELLDRPPY     | ----- |
| Phaeodactylum_tricornutum_4    | NVVALTITFLAAVVGYP-----PLNAVMMMLWVNLIMDTMGALALGTEPPIKLELLDRPPY     | ----- |
| Thalassiosira_pseudonana_6     | NIAAVVTALVGSFAYAKS-----PLAAIQLLWVNLIMDSLASLALASEPPTTEELLKQPV      | ----- |
| Phaeodactylum_tricornutum_5    | NISAVVTALVGSFAYQKS-----PLAAIQLLWVNLIMDSLASLALASEPPTVDDLKRPV       | ----- |
| Phaeodactylum_tricornutum_6    | NISAVATALVGSFAYQAS-----PLAAIQLLWVNLIMDSLASLALASEPPTVDSLLQRPV      | ----- |



|                                |                                                                                                 |       |
|--------------------------------|-------------------------------------------------------------------------------------------------|-------|
| Skeletonema_marinoi_ABC        | -----                                                                                           | PSDEP |
| Thalassiosira_pseudonana_1     | -----                                                                                           | PSNEP |
| Thalassiosira_oceanica_1       | -----                                                                                           | PSNEP |
| Phaeodactylum_tricornutum_1    | -----                                                                                           | PSDEP |
| Fragilariopsis_cylindrus_1     | -----                                                                                           | SSSEP |
| Fragilariopsis_cylindrus_2     | -----                                                                                           | SSSEP |
| Fragilariopsis_cylindrus_3     | -----                                                                                           | SSSEP |
| Fragilariopsis_cylindrus_4     | -----                                                                                           | SSSEP |
| Fragilariopsis_cylindrus_5     | -----                                                                                           | SSSEP |
| Fragilariopsis_cylindrus_6     | -----                                                                                           | SSSEP |
| Fragilariopsis_cylindrus_7     | -----                                                                                           | SSSEP |
| Fragilariopsis_cylindrus_8     | -----                                                                                           | SSSEP |
| Pseudo-nitzschia_multiseriis_1 | -----                                                                                           | PSNEP |
| Thalassiosira_pseudonana_2     | -----                                                                                           | PTSEE |
| Ostreococcus_lucimarinus_1     | -----                                                                                           | RKDED |
| Zea_mays_1                     | -----                                                                                           | RSDDS |
| Oryza_sativa_1                 | -----                                                                                           | RSDDS |
| Aquilegia_caerulea_1           | -----                                                                                           | RSDDS |
| A.thaliana_AT1G07810.1         | -----                                                                                           | RSDDS |
| A.thaliana_AT1G07670.1         | -----                                                                                           | RSDDS |
| Medicago_truncatula_1          | -----                                                                                           | RSDDS |
| Glycine_max_1                  | -----                                                                                           | HSDDS |
| Glycine_max_2                  | -----                                                                                           | HSDDS |
| Aquilegia_caerulea_2           | -----                                                                                           | RSDDS |
| Selaginella_moellendorffii_1   | -----                                                                                           | RSDDK |
| Physcomitella_patens_1         | -----                                                                                           | KSDDV |
| Physcomitella_patens_2         | -----                                                                                           | KSNDV |
| Physcomitella_patens_3         | -----                                                                                           | KSTDV |
| Selaginella_moellendorffii_2   | -----                                                                                           | KSNDK |
| Glycine_max_3                  | -----                                                                                           | RSDDP |
| Glycine_max_4                  | -----                                                                                           | RNDDP |
| Aquilegia_caerulea_3           | -----                                                                                           | KSNDK |
| A.thaliana_AT4G00900.1         | -----                                                                                           | KSDDC |
| Chlamydomonas_reinhardtii_1    | -----                                                                                           | RANDQ |
| Volvox_carteri_1               | -----                                                                                           | RANDQ |
| Micromonas_pusilla_1           | -----                                                                                           | KKDED |
| Micromonas_sp_1                | -----                                                                                           | RKDED |
| Selaginella_moellendorffii_3   | -----                                                                                           | LPTEG |
| Thalassiosira_oceanica_2       | -----                                                                                           | RTDDS |
| Thalassiosira_pseudonana_3     | -----                                                                                           | RADDN |
| Pseudo-nitzschia_multiseriis_2 | -----                                                                                           | GKDDS |
| Fragilariopsis_cylindrus_9     | -----                                                                                           | GKNDA |
| Fragilariopsis_cylindrus_10    | -----                                                                                           | GKNDA |
| Aquilegia_caerulea_4           | -----                                                                                           | KVNEA |
| Glycine_max_5                  | -----                                                                                           | KVNEA |
| Medicago_truncatula_2          | -----                                                                                           | KVNEA |
| A.thaliana_AT1G10130.1         | -----                                                                                           | KVNEA |
| Oryza_sativa_2                 | QCEHGLLCRLDGGGISSDEDVSAIQKIWHCLVQQTAAALTNPLRHCLRLVQCIAAAVSPFTLKLPIGWTAACASPSLLCEGDTVLAYQQLVLLLI | EVNEA |
| Selaginella_moellendorffii_4   | -----                                                                                           | KMDEA |
| Micromonas_pusilla_2           | -----                                                                                           | RPDES |
| Micromonas_sp_2                | -----                                                                                           | RSDEP |
| Volvox_carteri_2               | -----                                                                                           | RLDEP |
| Chlamydomonas_reinhardtii_2    | -----                                                                                           | RLDEP |
| Dunaliella_salina_1            | -----                                                                                           | --DDP |
| Ostreococcus_lucimarinus_2     | -----                                                                                           | SPREQ |
| Phaeodactylum_tricornutum_2    | -----                                                                                           | KADEP |
| Chlamydomonas_reinhardtii_3    | -----                                                                                           | RRGKR |
| Chlamydomonas_reinhardtii_4    | -----                                                                                           | RRGKR |
| Thalassiosira_pseudonana_4     | -----                                                                                           | RVGKR |
| Thalassiosira_pseudonana_5     | -----                                                                                           | RVGKR |

|                                 |       |       |
|---------------------------------|-------|-------|
| Fragilariopsis_cylindrus_11     | ----- | RVGKR |
| Fragilariopsis_cylindrus_12     | ----- | RVGKR |
| Pseudo-nitzschia_multiseriata_3 | ----- | RVGKR |
| Phaeodactylum_tricornutum_3     | ----- | RVGKR |
| Micromonas_pusilla_3            | ----- | PKTQP |
| Micromonas_sp_3                 | ----- | PKTQP |
| Chlamydomonas_reinhardtii_5     | ----- | GRSEA |
| Chlamydomonas_reinhardtii_6     | ----- | GRSEP |
| Volvox_carteri_3                | ----- | GRTEP |
| Volvox_carteri_4                | ----- | GRTEP |
| Volvox_carteri_5                | ----- | GRTEH |
| Chlamydomonas_reinhardtii_7     | ----- | GRTEQ |
| Chlamydomonas_reinhardtii_8     | ----- | GRNEN |
| Volvox_carteri_6                | ----- | GRNEN |
| Ostreococcus_lucimarinus_3      | ----- | GRTAP |
| Micromonas_sp_4                 | ----- | GRSAP |
| Selaginella_moellendorffii_5    | ----- | GLSEP |
| A.thaliana_AT3G21180.1          | ----- | GRREP |
| Aquilegia_caerulea_5            | ----- | GRREP |
| A.thaliana_AT5G57110.2          | ----- | GRKEP |
| Oryza_sativa_3                  | ----- | GRREP |
| Zea_mays_2                      | ----- | GRREP |
| Zea_mays_3                      | ----- | GRREP |
| Zea_mays_4                      | ----- | GRREP |
| Selaginella_moellendorffii_6    | ----- | GRREP |
| Selaginella_moellendorffii_7    | ----- | SKEAP |
| Aquilegia_caerulea_6            | ----- | GRKGN |
| Medicago_truncatula_3           | ----- | GRKGN |
| A.thaliana_AT2G22950.1          | ----- | GRRGN |
| A.thaliana_AT4G37640.1          | ----- | GRRGN |
| Oryza_sativa_4                  | ----- | GRKGN |
| Zea_mays_5                      | ----- | GRKGN |
| Oryza_sativa_5                  | ----- | GRTGK |
| A.thaliana_AT1G27770.1          | ----- | GRKGN |
| Oryza_sativa_6                  | ----- | GRKGN |
| Zea_mays_6                      | ----- | GRTGR |
| Aquilegia_caerulea_7            | ----- | GKSVN |
| Oryza_sativa_7                  | ----- | RRGDN |
| Selaginella_moellendorffii_8    | ----- | GRKGS |
| Selaginella_moellendorffii_9    | ----- | RRKEN |
| Oryza_sativa_8                  | ----- | GRAAP |
| Fragilariopsis_cylindrus_13     | ----- | KRNSS |
| Pseudo-nitzschia_multiseriata_4 | ----- | TRNSS |
| Phaeodactylum_tricornutum_4     | ----- | RRDSS |
| Thalassiosira_pseudonana_6      | ----- | NRSKS |
| Phaeodactylum_tricornutum_5     | ----- | NRTES |
| Phaeodactylum_tricornutum_6     | ----- | NRTDS |

|                                 |                     |          |                   |                 |       |
|---------------------------------|---------------------|----------|-------------------|-----------------|-------|
| Skeletonema_marinoi_ABC         | IMTNWMLFRYLVTGLYVG  | -----    | FATVGSFVGHYLS     | -----           | ----- |
| Thalassiosira_pseudonana_1      | IMTKFMACRYLVTGLYVG  | -----    | IATVGSFVGHYRS     | -----           | ----- |
| Thalassiosira_oceanica_1        | IMTKWMAFRYLITGLYVG  | -----    | IATVGSFVSYLLD     | -----           | ----- |
| Phaeodactylum_tricornutum_1     | IMTRWLLTRYCITGLYVG  | -----    | LATIGIFAQHYLS     | -----           | ----- |
| Fragilariopsis_cylindrus_1      | IMTKWLLIRYMLTGLYVG  | -----    | IATIGVFAQHYIK     | -----           | ----- |
| Fragilariopsis_cylindrus_2      | IMTRWLLIRYMLTGLYVG  | -----    | IATIGVFAQHYIK     | -----           | ----- |
| Fragilariopsis_cylindrus_3      | IMTKWLLIRYMLTGLYVG  | -----    | IATIGVFAQHYIK     | -----           | ----- |
| Fragilariopsis_cylindrus_4      | IMTRWLLIRYMLTGLYVG  | -----    | IATIGVFAQHYIK     | -----           | ----- |
| Fragilariopsis_cylindrus_5      | IMTKWLLIRYMLTGLYVG  | -----    | IATIGVFAQHYIK     | -----           | ----- |
| Fragilariopsis_cylindrus_6      | IMTRWLLIRYMLTGLYVG  | -----    | IATIGVFAQHYIK     | -----           | ----- |
| Fragilariopsis_cylindrus_7      | IMTKWLLIRYMLTGLYVG  | -----    | IATIGVFAQHYIK     | -----           | ----- |
| Fragilariopsis_cylindrus_8      | IMTRWLLIRYMLTGLYVG  | -----    | IATIGVFAQHYIK     | -----           | ----- |
| Pseudo-nitzschia_multiseriata_1 | IMTKWLLIRYMLTGLYVG  | -----    | VATIGIFAQHYLO     | -----           | ----- |
| Thalassiosira_pseudonana_2      | ILTPSLLLRYSTAGLYIG  | -----    | IATVGIYASYFVD     | -----           | ----- |
| Ostreococcus_lucimarinus_1      | LLSNWVMFRYAVVGLYVG  | -----    | VATVGAFAIWFTR     | TSFMGIDL        | SQD   |
| Zea_mays_1                      | LITPWILFRYMLVGLYVG  | -----    | VATVGFIIWYTH      | DSFLGIDL        | ASD   |
| Oryza_sativa_1                  | LITPWILFRYMLVGLYVG  | -----    | IATVGVFIIWYTH     | GSFLGIDL        | AGD   |
| Aquilegia_caerulea_1            | LISPWILFRYLVI GLYVG | -----    | VATVGVFIIWYTH     | ASFLGIDL        | SGD   |
| A.thaliana_AT1G07810.1          | LITAWILFRYMLVGLYVG  | -----    | VATVGVFIIWYTH     | SSFMGIDL        | SQD   |
| A.thaliana_AT1G07670.1          | LITAWILFRYMLVGLYVG  | -----    | VATVGVFIIWYTH     | NSFMGIDL        | SQD   |
| Medicago_truncatula_1           | LINLWILFRYLVI GIYVG | -----    | LATVGVFIIWYTH     | GSFMGIDL        | SSD   |
| Glycine_max_1                   | LINLWILFRYLVI GIYVG | -----    | LATVGFIIWYTH      | GSFFGIDL        | SGD   |
| Glycine_max_2                   | LINLWILFRYLVI GIYVG | -----    | LATVGFIIWYTH      | GSFFGIDL        | SGD   |
| Aquilegia_caerulea_2            | LISAWILFRYLVI GLYVG | -----    | IATVGVFIIWYTH     | SSFLGIDL        | SGD   |
| Selaginella_moellendorffii_1    | LINSWVFFRYMVI GLYVG | -----    | LATVGFIFALWYTH    | GSFLGLDI        | SGD   |
| Physcomitella_patens_1          | LINAWVFFRYLVI GLYVG | -----    | VATVGAFAIWFTR     | ASFLGINL        | AAD   |
| Physcomitella_patens_2          | LINGWVFFRYLVI GLYVG | -----    | IATVGAFAIWFTR     | ASFLGINL        | AAD   |
| Physcomitella_patens_3          | LINSWVLLRYLVI GLYVG | -----    | IATVGAFAIWFTR     | FSFLGIDL        | SSD   |
| Selaginella_moellendorffii_2    | LINAWVLLRYMVI GLYVG | -----    | VATVGFIFALWYTH    | DSFLGIDL        | SSD   |
| Glycine_max_3                   | LISWVLFRLVIGSYVG    | -----    | LATVGFIFVLWYTH    | ASFLGINL        | VSD   |
| Glycine_max_4                   | LISWVLFRLVIGSYVG    | -----    | LATVGFIFVLWYTH    | ASFLGINL        | VSD   |
| Aquilegia_caerulea_3            | LIDSWVLFRLVIGSYVG   | -----    | IATVGVFIIWYTH     | GSFLGINL        | AED   |
| A.thaliana_AT4G00900.1          | LIDSWVLFRLVIGSYVG   | -----    | VATVGFIFVLWYTH    | ASFLGISI        | ISD   |
| Chlamydomonas_reinhardtii_1     | LITPWVFFRYMVI GGYVG | -----    | VATVGAFAVSWYMY    | DRFMGIDL        | SRD   |
| Volvox_carteri_1                | LITPWVFFRYMVI GGYVG | -----    | VATVGAFAVSWYMY    | DHFVGLDI        | SRD   |
| Micromonas_pusilla_1            | LISAWALVRYLVVGLYVG  | -----    | AATVGVFAVWYTR     | SSFLGIDL        | SGD   |
| Micromonas_sp_1                 | LITWAMVRYLVVGLYVG   | -----    | AATVGFIFAVWYTK    | TEFLGIDL        | AKD   |
| Selaginella_moellendorffii_3    | FISGWTLFRFLTI GLYVG | -----    | LATIGIFGLWYLN     | DSFLGIDL        | SRD   |
| Thalassiosira_oceanica_2        | LITPWVFFRYMVI GYIVG | -----    | FACVAVFAYWYIY     | -----           | HEG   |
| Thalassiosira_pseudonana_3      | LITPWVFFRYMVI GYIVG | -----    | FACVGVFAVWYMY     | -----           | YES   |
| Pseudo-nitzschia_multiseriata_2 | LITNWVFFRYMVI GLYVG | -----    | FATVGFIFVFWYTEYES | FVSFLGPSLMEITLG | ATFD  |
| Fragilariopsis_cylindrus_9      | LINNWVFFRYMVI GLYVG | -----    | FATVGFIFFWYIGYEP  | FVNYLGPDLMNTLG  | STYD  |
| Fragilariopsis_cylindrus_10     | LINNWVFFRYMVI GLYVG | -----    | FATVGFIFFWYIGYEP  | FVNYLGPDLMNTLG  | STYD  |
| Aquilegia_caerulea_4            | VVSGWLFRRYLVI GAYVG | -----    | LATVAGFIWWFVYSEN  | -----           | ----- |
| Glycine_max_5                   | VVTGWLFRRYLVI GAYVG | -----    | LATVAGFIWWFVYSDS  | -----           | ----- |
| Medicago_truncatula_2           | VVTGWLFRRYLVI GAYVG | -----    | LATVAGFIWWFVYSDG  | -----           | ----- |
| A.thaliana_AT1G10130.1          | VVNGWLFRRYLVI GAYVG | -----    | LATIAGFVWWFVYSED  | -----           | ----- |
| Oryza_sativa_2                  | IVNGWLFRRYMLV GAYVG | -----    | LATVGGFIWWFVYHEE  | -----           | ----- |
| Selaginella_moellendorffii_4    | IVDRWLFVRYLVVGMVYG  | -----    | FVTVGAFAVWYMSYLD  | -----           | ----- |
| Micromonas_pusilla_2            | IVDRWLFVRYLVVGMVYG  | -----    | FVTVGAFAVWYMSYLD  | -----           | ----- |
| Micromonas_sp_2                 | IVDRWLFVRYLVVGMVYG  | LELPDVVF | FTLIGGFVWVYMFHSG  | -----           | ----- |
| Volvox_carteri_2                | IVNGWLFIRYLVI GMYVG | -----    | LVTVAGFLWWFLGYQG  | -----           | ----- |
| Chlamydomonas_reinhardtii_2     | IVNGWLFVRYLVVGMVYG  | -----    | LATVGGFLWWFLAHEG  | -----           | ----- |
| Dunaliella_salina_1             | IVNGWLFRLYLI GMYVG  | -----    | IVTVYGFVWVYISYPE  | -----           | ----- |
| Ostreococcus_lucimarinus_2      | IVDRWLLIRYLI GYVYG  | -----    | IATVGSFGVWVMSYPG  | -----           | ----- |
| Phaeodactylum_tricornutum_2     | IVTRALLLRATSSAALIV  | -----    | FLTLKVFS          | -----           | ----- |
| Chlamydomonas_reinhardtii_3     | LVGKLLLRCCFFVNVVV   | -----    | ALVGLMFYWGGE      | -----           | ----- |
| Chlamydomonas_reinhardtii_4     | LVGKLLLRMFFVCHVVV   | -----    | ALVGLMFYWGGRG     | -----           | ----- |
| Thalassiosira_pseudonana_4      | LIGRFLRLRIIVGTVLLT  | -----    | GCVVASAIIVDTII    | PRYDY           | ----- |
| Thalassiosira_pseudonana_5      | LIGRYLFLRIILGTVILT  | -----    | GCVVGGALIVD       | -----           | ----- |

|                                |                    |                      |           |                                           |
|--------------------------------|--------------------|----------------------|-----------|-------------------------------------------|
| Fragilariopsis_cylindrus_11    | LIGRFLFLRIVLGTILLV | LVTVASSIWAEEYLENNYDY |           |                                           |
| Fragilariopsis_cylindrus_12    | LIGRFLFLRIVLGTILLV | LVTVASSIWAEEYLENNYDY |           |                                           |
| Pseudo-nitzschia_multiseriis_3 | LIGRFLFLRIALGTVVLV | FVTVGASLWAEHILKTEYGM |           |                                           |
| Phaeodactylum_tricornutum_3    | LIGRFLALRIAIGTITLV | GCTVGSVFWAK          |           |                                           |
| Micromonas_pusilla_3           | VVQMMWVRGIVNGMILT  | VCIFCTYLIALHAYAGAF   |           | LTDDITDTSRSSCS                            |
| Micromonas_sp_3                | IVMNMWVRGIVANGLILT | VCIFYTYMIALWAYAGAF   |           | TSDEITDPTRTSCA                            |
| Chlamydomonas_reinhardtii_5    | IITGLMYTHIVVAALY   | KLFWLFAclyGLPR       | VLP       | AYATLTKGEYYQT MCP                         |
| Chlamydomonas_reinhardtii_6    | IITGYMYMHILAGATY   | KLIWLFAClyGLPR       | AIS       | AYAVLTPDEYYRE DCN                         |
| Volvox_carteri_3               | IITGLMYMHIVAAALY   | KLFWLFAclyGLPR       | VID       | RYSVLGKDEYYQD KCD                         |
| Volvox_carteri_4               | IITGLMYMHIVAAALY   | KLFWLFAclyGLPR       | VID       | RYSVLGKDEYYQD KCD                         |
| Volvox_carteri_5               | LINWKMYSKHIFVQGCY  | QMLWMMFLCLYLLPM      | GPKRGRDA  | VSYASSCRTVVMMLYSFCSSHAAQLLWQ RAVPLISGVSSR |
| Chlamydomonas_reinhardtii_7    | LINAKMTKHHILVQGSY  | QMIWMFLCLYLLPQ       | GPPG      | LEQYKVHNEAYMANQ DCV                       |
| Chlamydomonas_reinhardtii_8    | LITRIMWKHILVQGFY   | QIFWMFLILYGMPV       | FLNGAKYNG | RYDIEGREDWWKR ECM                         |
| Volvox_carteri_6               | LITRIMWKHILVQGCY   | QLFWMFFILYGAPK       | ILTDA     | RYAIEPKEDFWMR ECS                         |
| Ostreococcus_lucimarinus_3     | LINXHMWRNIIIGVSIV  | QLTVCMVFMFDGKR       | LLD       |                                           |
| Micromonas_sp_4                | LVNKEMWRNIVVMSLY   | QLIVCLVLLFAGQD       | LLG       |                                           |
| Selaginella_moellendorffii_5   | LVTNVMWRNIIFGQAA   | QVAVLLVLYFRGDO       | ILH       |                                           |
| A.thaliana_AT3G21180.1         | LITNIMWRNLLVQSFY   | QVAVLLVLFNFAGLS      | ILG       |                                           |
| Aquilegia_caerulea_5           | LITNIMWRNLLVQALY   | QVIVLLVLFNFMGKN      | ISF       |                                           |
| A.thaliana_AT5G57110.2         | LITNIMWRNLLIQAIY   | QVSVLLTLNFRGIS       | ILG       |                                           |
| Oryza_sativa_3                 | LITNVMWRNLIIMALF   | QVIVLLTLNFRGTS       | LLC       |                                           |
| Zea_mays_2                     | LVTNIMWRNLIIMATF   | QVSVLLSLNFKGIS       | LLC       |                                           |
| Zea_mays_3                     | LVTNVMWRNLFVQALY   | QIAVLLIFNFDGKR       | ILR       |                                           |
| Zea_mays_4                     | LVTNIMWRNLFVQALY   | QVAILLIFDFDQVR       | ILR       |                                           |
| Selaginella_moellendorffii_6   | LVTNIMWRNIIFQAIY   | QLSVLFTLFFGGLK       | ILK       |                                           |
| Selaginella_moellendorffii_7   | LINNIMWRNLLGQSIY   | QLGLLLVLFKFKGIE      | ILN       |                                           |
| Aquilegia_caerulea_6           | FISNVNWRNIIIGQSLY  | QFVVIWYLOTRGKA       | LFS       |                                           |
| Medicago_truncatula_3          | FISNVNWRNIIIGQSLY  | QFMVIWFLOSKGKT       | IFS       |                                           |
| A.thaliana_AT2G22950.1         | FITNAMWRNIIIGQAVY  | QFIIIWILQAKGKS       | MFG       |                                           |
| A.thaliana_AT4G37640.1         | FITNAMWRNIIIGQAVY  | QFIVIWILQAKGKA       | MFG       |                                           |
| Oryza_sativa_4                 | FISNVNWRNIIIGQAFY  | QFIVIWYLOTEGKW       | LFG       |                                           |
| Zea_mays_5                     | FISNVNWRNIIIGQALY  | QFLVIWSLQSRGKS       | LFG       |                                           |
| Oryza_sativa_5                 | FITNVMWRNIIIGQSFY  | QFIVMWYLOTOGKS       | MFG       |                                           |
| A.thaliana_AT1G27770.1         | FISNVNWRNIIIGQSLY  | QLVIIWCLQTKGKT       | MFG       |                                           |
| Oryza_sativa_6                 | FITNVMWRNIIIGQSLY  | QFVMIWYLOTOGKH       | LFG       |                                           |
| Zea_mays_6                     | FITNVMWRNIIIGQSIY  | QFVVIWYLOTOGEY       | LFG       |                                           |
| Aquilegia_caerulea_7           | FITGIMWRNIIIGQSIY  | QLAVLGVLKFDGKH       | LLK       |                                           |
| Oryza_sativa_7                 | FITRIMWRNIIIGQGLY  | QLLVLATLMVIGKK       | LLS       |                                           |
| Selaginella_moellendorffii_8   | FISVPMWRNIIAVQVY   | QLVVLNVLKYKGD        | ILG       |                                           |
| Selaginella_moellendorffii_9   | FISVPMWRNIIAVQVY   | QLVVLNVLQYRGL        | IFG       |                                           |
| Oryza_sativa_8                 | LISNAMWRNIIAQAAY   | QVAVLLALQYRFGF       |           |                                           |
| Fragilariopsis_cylindrus_13    | LISLPMWRNIIIGQSTF  | QLSLLVYLLKNGPK       | LFN       |                                           |
| Pseudo-nitzschia_multiseriis_4 | LISRPNWRNIIIGQSTY  | QLTLLVYLLNKGPT       | LYN       |                                           |
| Phaeodactylum_tricornutum_4    | LISRPNWRNIIIGQAVF  | QLSLLVFLNKGPA        | MFE       |                                           |
| Thalassiosira_pseudonana_6     | IATRMWANMLGQALY    | QIAVMFLFGGAE         | AFG       |                                           |
| Phaeodactylum_tricornutum_5    | MITKHMWANMLGQAA    | QITVIMVLLFAGPE       | LLG       |                                           |
| Phaeodactylum_tricornutum_6    | MITKHMWANMLGQATY   | QITVVMVLLFPQPD       | LLD       |                                           |

|                                |                                          |         |        |
|--------------------------------|------------------------------------------|---------|--------|
| Skeletonema_marinoi_ABC        | OGVTLHQL                                 | SSWGKC  | NOVW   |
| Thalassiosira_pseudonana_1     | QGLTLRQL                                 | SSWGKC  | DQTW   |
| Thalassiosira_oceanica_1       | OGISLKQL                                 | RSWGKC  | DQSW   |
| Phaeodactylum_tricornutum_1    | OGITLAQL                                 | ATWSQC  | GEFW   |
| Fragilariopsis_cylindrus_1     | OGITLKQL                                 | SNWSNC  |        |
| Fragilariopsis_cylindrus_2     | OGITLKQL                                 | SNWSNC  |        |
| Fragilariopsis_cylindrus_3     | OGITLKQL                                 | SNWSNC  | GTTWM  |
| Fragilariopsis_cylindrus_4     | OGITLKQL                                 | SNWSNC  | GTTWM  |
| Fragilariopsis_cylindrus_5     | OGITLKQL                                 | SNWSNC  | GTTWM  |
| Fragilariopsis_cylindrus_6     | OGITLKQL                                 | SNWSNC  | GTTWM  |
| Fragilariopsis_cylindrus_7     | OGITLKQL                                 | SNWSNC  | GTTWM  |
| Fragilariopsis_cylindrus_8     | OGITLKQL                                 | SNWSNC  | GTTWM  |
| Pseudo-nitzschia_multiseries_1 | OGISLKQL                                 | SNWSNC  | GTDW   |
| Thalassiosira_pseudonana_2     | QGINVQEL                                 | SSWSSC  |        |
| Ostreococcus_lucimarinus_1     | GHTPVTFKQL                               | TNWGEC  | ASW    |
| Zea_mays_1                     | GHTLVSYSQL                               | SNWDKC  | SSW    |
| Oryza_sativa_1                 | GHSLVSYSQL                               | SNWGQC  | SSW    |
| Aquilegia_caerulea_1           | GHTLVYSQL                                | SNWGQC  | SSW    |
| A.thaliana_AT1G07810.1         | GHSLVSYSQL                               | AHWGQC  | SSW    |
| A.thaliana_AT1G07670.1         | GHSLVSYSQL                               | AHWGQC  | SSW    |
| Medicago_truncatula_1          | GHTLVYSQL                                | ANWGQC  | SSW    |
| Glycine_max_1                  | GHTLVYTQL                                | ANWGQC  | SSW    |
| Glycine_max_2                  | GHSLVYTQL                                | ANWGQC  | SSW    |
| Aquilegia_caerulea_2           | GHTLVYSQL                                | SNWGQC  | PSW    |
| Selaginella_moellendorffii_1   | GHTLVTFSQL                               | TSWGEC  | PSW    |
| Physcomitella_patens_1         | GHTLVSFSQL                               | THWGEC  | STW    |
| Physcomitella_patens_2         | GHTLVSFSQL                               | THWGEC  | STW    |
| Physcomitella_patens_3         | GHTLVSFSQL                               | RNWGDC  | PNW    |
| Selaginella_moellendorffii_2   | GHSLVTFSQL                               | THWGEC  | PTW    |
| Glycine_max_3                  | GHTIIELSQL                               | RNWGEC  | PSW    |
| Glycine_max_4                  | GHTIIELSQL                               | RNWGEC  | PSW    |
| Aquilegia_caerulea_3           | GHTLVTLYQL                               | RTWGQC  | PSW    |
| A.thaliana_AT4G00900.1         | GHTLVSFSQL                               | QNWSEC  | SSWG   |
| Chlamydomonas_reinhardtii_1    | GHSTVTWEQL                               | TNWQSC  | REW    |
| Volvox_carteri_1               | GHTTVTWEQL                               | TNWQSC  | REW    |
| Micromonas_pusilla_1           | GHTTVTWHQL                               | SHWGDC  | ASWG   |
| Micromonas_sp_1                | GHTPVTWLQL                               | THWGEC  | ETW    |
| Selaginella_moellendorffii_3   | GHTAVSFQQL                               | SHWGEC  | PLW    |
| Thalassiosira_oceanica_2       | DHTNITWEQL                               | SNWGHC  | STW    |
| Thalassiosira_pseudonana_3     | DHTNISWEQL                               | TGWGHC  | STW    |
| Pseudo-nitzschia_multiseries_2 | GHSMTYQQL                                | TRWGQC  | RTGE   |
| Fragilariopsis_cylindrus_9     | GHSMTSYAQL                               | THWGQC  | RTGS   |
| Fragilariopsis_cylindrus_10    | GHSMTSYAQL                               | THWGQC  | RTGS   |
| Aquilegia_caerulea_4           | GPKLPPYEL                                | INFDTC  | PARE   |
| Glycine_max_5                  | GPKLPPYEL                                | MNFDTC  | PTRE   |
| Medicago_truncatula_2          | GPKLPPYEL                                | MNFDTC  | PTRE   |
| A.thaliana_AT1G10130.1         | GPKLTYSEL                                | MNFETC  | ALRE   |
| Oryza_sativa_2                 | GPRLPYSELARKPLLHALLLARKWDKMMWSNNHTSSYQOK | PNVFDSC | STRO   |
| Selaginella_moellendorffii_4   | GPRLTWKEL                                | VSNFNEC | KDGT   |
| Micromonas_pusilla_2           | GPMLTWSEL                                | TSFESC  | EEGK   |
| Micromonas_sp_2                | GPLMTWHQL                                | TSFTEC  | VEGV   |
| Volvox_carteri_2               | GGNLTWSQL                                | TAFQKCT | EPSAKA |
| Chlamydomonas_reinhardtii_2    | GGGLTWGQL                                | TSFQKCT | EASAKA |
| Dunaliella_salina_1            | GGNMTWSQL                                | THFQSC  | ASQP   |
| Ostreococcus_lucimarinus_2     | GPQMTWAEEL                               | TSASRCT |        |
| Phaeodactylum_tricornutum_2    | NEL                                      |         |        |
| Chlamydomonas_reinhardtii_3    |                                          |         |        |
| Chlamydomonas_reinhardtii_4    |                                          |         |        |
| Thalassiosira_pseudonana_4     |                                          |         |        |
| Thalassiosira_pseudonana_5     |                                          |         |        |



|                                |        |                |  |        |    |       |           |
|--------------------------------|--------|----------------|--|--------|----|-------|-----------|
| Skeletonema_marinoi_ABC        |        | NPP            |  | D      |    | GVTCE | SLFQ      |
| Thalassiosira_pseudonana_1     |        | SPP            |  | D      |    | GVTCD | SLFQ      |
| Thalassiosira_oceanica_1       |        | SPP            |  | D      |    | GVTCD | SLFQ      |
| Phaeodactylum_tricornutum_1    |        | TPPT           |  | E      |    | SASCT | DLFQ      |
| Fragilariopsis_cylindrus_1     |        | ATVVG          |  | TSSTD  | SS | SI-Q  | QNACSILFR |
| Fragilariopsis_cylindrus_2     |        | ATVVG          |  | TSSTD  | SS | SI-Q  | QNACSILFR |
| Fragilariopsis_cylindrus_3     | PP     | PVAAAATVVG     |  | TSSTD  | SS | SI-Q  | QNACSILFR |
| Fragilariopsis_cylindrus_4     | PP     | PVAAAATVVG     |  | TSSTD  | SS | SI-Q  | QNACSILFR |
| Fragilariopsis_cylindrus_5     | PP     | PVAAAATVVG     |  | TSSTD  | SS | SI-Q  | QNACSILFR |
| Fragilariopsis_cylindrus_6     | PP     | PVAAAATVVG     |  | TSSTD  | SS | SI-Q  | QNACSILFR |
| Fragilariopsis_cylindrus_7     | PP     | PVAAAATVVG     |  | TSSTD  | SS | SI-Q  | QNACSILFR |
| Fragilariopsis_cylindrus_8     | PP     | VAAAATVVG      |  | TSSTD  | SS | SI-Q  | QNACSILFR |
| Pseudo-nitzschia_multiseries_1 |        | TPAGG          |  | SSWLTG |    | SI-Q  | QNACSILFR |
| Thalassiosira_pseudonana_2     |        |                |  | D      |    | AIACS | VYIT      |
| Ostreococcus_lucimarinus_1     |        | KNFKGGKFT-AGG  |  | VAYS   |    | YTG   | KHACDYFE  |
| Zea_mays_1                     |        | EGFKVSPFT-AGA  |  | RTFS   |    | F-D   | ANPCDYFQ  |
| Oryza_sativa_1                 |        | EGFKVSPFT-AGA  |  | RTFN   |    | F-D   | VNPCDYFQ  |
| Aquilegia_caerulea_1           |        | ENFTVSPFT-AGS  |  | QTFS   |    | F-D   | NPCDYFQ   |
| A.thaliana_AT1G07810.1         |        | EGFKVSPFT-AGS  |  | QTFS   |    | F-D   | SNPCDYFQ  |
| A.thaliana_AT1G07670.1         |        | EGFKVSPFT-AGS  |  | QTFS   |    | F-D   | SNPCDYFQ  |
| Medicago_truncatula_1          |        | NNFTAAPFT-AGS  |  | RIIS   |    | F-D   | ADPCDYFT  |
| Glycine_max_1                  |        | QNFTASPFT-AGA  |  | KTIT   |    | F-D   | NPCDYFS   |
| Glycine_max_2                  |        | QNFTASPFT-AGA  |  | KTIT   |    | F-D   | NPCDYFS   |
| Aquilegia_caerulea_2           |        | EGFTVSPFT-AGG  |  | QVFS   |    | F-D   | ANPCDYFQ  |
| Selaginella_moellendorffii_1   |        | QGFVAPFA-AGS   |  | QVFS   |    | F-D   | KNPCDYFT  |
| Physcomitella_patens_1         |        | KDFKVPFT-AGD   |  | LTL    |    | F-D   | DNPCDYFT  |
| Physcomitella_patens_2         |        | KDFKVPFT-AGN   |  | QTL    |    | F-D   | DNPCDYFT  |
| Physcomitella_patens_3         |        | QDFKVPFT-AGN   |  | LTL    |    | F-E   | DNPCDYFT  |
| Selaginella_moellendorffii_2   |        | EGFTVAPFT-VGS  |  | RIYS   |    | F-D   | SNPCDYFA  |
| Glycine_max_3                  |        | SNFTVAPFEVAGG  |  | RLIT   |    | F     | SNPCDYFS  |
| Glycine_max_4                  |        | SNFTIAPFEVAGG  |  | RLIT   |    | F     | SNPCDYFS  |
| Aquilegia_caerulea_3           |        | SNFSVSPFTVSGG  |  | RVIS   |    | F     | SNPCDYFS  |
| A.thaliana_AT4G00900.1         |        | INFTATPYTVAGG  |  | LRTIA  |    | F-E   | NNPCDYFT  |
| Chlamydomonas_reinhardtii_1    |        | GNFTAKPYLLQGG  |  | GVVS   |    | F     | PHPCDYFT  |
| Volvox_carteri_1               |        | GNFTAAPYKLAGG  |  | QVVS   |    | I     | AHPCEYFS  |
| Micromonas_pusilla_1           |        | SSFKGGKYS-AGG  |  | ATFD   |    | YTSP  | ANKCDYFT  |
| Micromonas_sp_1                |        | KGFAGGKFT-AGG  |  | VTYS   |    | YTG   | SDACDYFH  |
| Selaginella_moellendorffii_3   |        | PEFHANPVTIAGN  |  | EVMS   |    | F     | ASSCDYFT  |
| Thalassiosira_oceanica_2       |        | TDFKVNDFDG     |  | LD     |    | M-Q   | TDPCKYFT  |
| Thalassiosira_pseudonana_3     |        | TDFKVNDFDG     |  | LD     |    | M-Q   | TDPCKYFT  |
| Pseudo-nitzschia_multiseries_2 | DALGTI | FEGFSVNDFDHTGQ |  | GTIE   |    | DF-S  | SDPCSIFT  |
| Fragilariopsis_cylindrus_9     | EAVGTI | FEGFSVNDFDNTGD |  | GFIE   |    | DF-T  | SEPCTYFT  |
| Fragilariopsis_cylindrus_10    | EAVGTI | FEGFSVNDFDNTGD |  | GFIE   |    | DF-T  | SEPCTYFT  |
| Aquilegia_caerulea_4           |        |                |  | T      |    |       | TYPCSI    |
| Glycine_max_5                  |        |                |  | T      |    |       | TYPCSI    |
| Medicago_truncatula_2          |        |                |  | T      |    |       | TYPCSI    |
| A.thaliana_AT1G10130.1         |        |                |  | T      |    |       | TYPCSI    |
| Oryza_sativa_2                 |        |                |  | T      |    |       | SYPCSI    |
| Selaginella_moellendorffii_4   |        |                |  | M      |    |       | RYS       |
| Micromonas_pusilla_2           |        |                |  | Q      |    |       | RYS       |
| Micromonas_sp_2                |        |                |  | E      |    |       | KYSCDIFW  |
| Volvox_carteri_2               |        |                |  | A      |    |       | GYTCAV    |
| Chlamydomonas_reinhardtii_2    |        |                |  | A      |    |       | GYSCDV    |
| Dunaliella_salina_1            |        |                |  | GG     |    |       | AKDCEV    |
| Ostreococcus_lucimarinus_2     |        |                |  |        |    |       | GDACE     |
| Phaeodactylum_tricornutum_2    |        |                |  | D      |    |       |           |
| Chlamydomonas_reinhardtii_3    |        |                |  | S      |    |       | STP-G     |
| Chlamydomonas_reinhardtii_4    |        |                |  | S      |    |       | DTP-G     |
| Thalassiosira_pseudonana_4     |        |                |  |        |    |       | LN        |
| Thalassiosira_pseudonana_5     |        |                |  |        |    |       | R         |

|                                 |        |                                  |                       |                          |         |
|---------------------------------|--------|----------------------------------|-----------------------|--------------------------|---------|
| Fragilariopsis_cylindrus_11     | -----  | D                                | -----                 |                          |         |
| Fragilariopsis_cylindrus_12     | -----  | D                                | -----                 |                          |         |
| Pseudo-nitzschia_multiseriata_3 | -----  | D                                | -----PT               |                          |         |
| Phaeodactylum_tricornutum_3     | -----  | D                                | -----                 |                          |         |
| Micromonas_pusilla_3            | -----  | D                                | -----CKRCI            |                          |         |
| Micromonas_sp_3                 | -----  | D                                | -----CAVCI            |                          |         |
| Chlamydomonas_reinhardtii_5     | AI-N   | TTVPSLQQDAVCSNGQFSPTANFSGVVAPGEA | CVRNTNLESAQRAMDDEWDRE |                          |         |
| Chlamydomonas_reinhardtii_6     | RY-NG  | SAVPPNQONAVCIPLGFPO              | GTN                   | CPRNEGLTSAQKDMDEWDRE     |         |
| Volvox_carteri_3                | PL-S   | KPVVNDQLIACVGN                   | STN                   | CAKNOELIRAQTAMDDEWDRE    |         |
| Volvox_carteri_4                | PL-S   | KPVVNDQLIACVGN                   | STN                   | CAKNOELIRAQTAMDDEWDRE    |         |
| Volvox_carteri_5                | P      | AAVPTDMGTALCKGAYGRN              | TTD                   | CDRFQWVKAVDGYMDDEYKDY    |         |
| Chlamydomonas_reinhardtii_7     | P      | QPVPADRATALCTNPAYPRN             | GTDA                  | SVCDYESWAETVQGLDDEFMDY   |         |
| Chlamydomonas_reinhardtii_8     | NS-SST | IKTVPEDEPTAMCDYDRPNPG            | ATGN                  | PGCVVHWSQYQDADTRMKRDYETH |         |
| Volvox_carteri_6                | NV-N   | RTVPSDARTAMCDFSVTAGG             | VRSE                  | CDLYKAWOSAKKTMNDEYATH    |         |
| Ostreococcus_lucimarinus_3      | -----  | KYVAAS                           | GS                    | VAAH                     | YD      |
| Micromonas_sp_4                 | -----  | D                                | -----                 | ESD                      | GD      |
| Selaginella_moellendorffii_5    | -----  | K                                | -----                 | GSP                      | A       |
| A.thaliana_AT3G21180.1          | -----  | N                                | -----                 | HEN                      | -----   |
| Aquilegia_caerulea_5            | -----  | E                                | -----                 | LKT                      | -----   |
| A.thaliana_AT5G57110.2          | -----  | E                                | -----                 | HEV                      | -----   |
| Oryza_sativa_3                  | -----  | K                                | -----                 | NDN                      | -----   |
| Zea_mays_2                      | -----  | K                                | -----                 | NDD                      | -----   |
| Zea_mays_3                      | -----  | C                                | -----                 | NGS                      | -----   |
| Zea_mays_4                      | -----  | C                                | -----                 | NES                      | -----   |
| Selaginella_moellendorffii_6    | -----  | H                                | -----                 | GPD                      | -----   |
| Selaginella_moellendorffii_7    | -----  | K                                | -----                 | DDP                      | -----P  |
| Aquilegia_caerulea_6            | -----  | D                                | -----                 | GPG                      | -----   |
| Medicago_truncatula_3           | -----  | D                                | -----                 | GPN                      | -----   |
| A.thaliana_AT2G22950.1          | -----  | V                                | -----                 | GSD                      | -----   |
| A.thaliana_AT4G37640.1          | -----  | D                                | -----                 | GPD                      | -----   |
| Oryza_sativa_4                  | -----  | K                                | -----                 | GEN                      | -----   |
| Zea_mays_5                      | -----  | E                                | -----                 | RRAD                     | -----   |
| Oryza_sativa_5                  | -----  | D                                | -----                 | GPD                      | -----   |
| A.thaliana_AT1G27770.1          | -----  | D                                | -----                 | GPD                      | -----   |
| Oryza_sativa_6                  | -----  | E                                | -----                 | GYH                      | -----   |
| Zea_mays_6                      | -----  | E                                | -----                 | SSE                      | -----   |
| Aquilegia_caerulea_7            | -----  | S                                | -----                 | GSD                      | -----   |
| Oryza_sativa_7                  | -----  | E                                | -----                 | GPO                      | -----   |
| Selaginella_moellendorffii_8    | -----  | -----                            | -----                 | -----                    | -----   |
| Selaginella_moellendorffii_9    | -----  | VDA                              | -----                 | GDH                      | -----   |
| Oryza_sativa_8                  | -----  | -----                            | -----                 | -----                    | -----G  |
| Fragilariopsis_cylindrus_13     | -----  | E                                | -----                 | -----                    | -----D  |
| Pseudo-nitzschia_multiseriata_4 | -----  | E                                | -----                 | -----                    | -----D  |
| Phaeodactylum_tricornutum_4     | -----  | E                                | -----                 | -----                    | -----D  |
| Thalassiosira_pseudonana_6      | -----  | E                                | -----                 | EGHL                     | -----   |
| Phaeodactylum_tricornutum_5     | -----  | E                                | -----                 | AGHIV                    | -----EK |
| Phaeodactylum_tricornutum_6     | -----  | E                                | -----                 | AGH                      | -----K  |



|                                 |                       |       |          |    |      |      |     |              |          |              |
|---------------------------------|-----------------------|-------|----------|----|------|------|-----|--------------|----------|--------------|
| Skeletonema_marinoi_ABC         | -GVGRELPTQLSLTLVLMF   | ----- | LLKALS   | AV | SVN  | SSIF | --- | TVGPNQNPWL   | VAGVAL   | PFALHLAVV    |
| Thalassiosira_pseudonana_1      | -GAGRELPTQLSLTLVLCME  | ----- | LFKALS   | AV | SVD  | SSLL | --- | SVGPNQNPWL   | MIGVAV   | PFLLHIAVV    |
| Thalassiosira_oceanica_1        | -GVGRELPTQLSLTLVLCME  | ----- | LFKALS   | AV | SVD  | SSLL | --- | AVGPNQNPWL   | VAGVAL   | PFLLHVAVI    |
| Phaeodactylum_tricornutum_1     | -GSARMLPTQLALTLVLCME  | ----- | MLKALS   | AV | SMD  | DSIF | --- | RVGPQENKWL   | ILGVSG   | GPFLHLMLVL   |
| Fragilariopsis_cylindrus_1      | -NNGRILPTQLSLTLVVME   | ----- | MLKALS   | AV | SVN  | DSLL | --- | KVPPWKNKYLL  | VGVS     | GPFLHLHLVL   |
| Fragilariopsis_cylindrus_2      | -NNGRILPTQLSLTLVVME   | ----- | MLKALS   | AV | SVN  | DSLL | --- | KVPPWKNKYLL  | VGVS     | GPFLHLHLVL   |
| Fragilariopsis_cylindrus_3      | -NNGRILPTQLSLTLVVME   | ----- | MLKALS   | AV | SVN  | DSLL | --- | KVPPWKNKYLL  | VGVS     | GPFLHLHLVL   |
| Fragilariopsis_cylindrus_4      | -NNGRILPTQLSLTLVVME   | ----- | MLKALS   | AV | SVN  | DSLL | --- | KVPPWKNKYLL  | VGVS     | GPFLHLHLVL   |
| Fragilariopsis_cylindrus_5      | -NNGRILPTQLSLTLVVME   | ----- | MLKALS   | AV | SVN  | DSLL | --- | KVPPWKNKYLL  | VGVS     | GPFLHLHLVL   |
| Fragilariopsis_cylindrus_6      | -NNGRILPTQLSLTLVVME   | ----- | MLKALS   | AV | SVN  | DSLL | --- | KVPPWKNKYLL  | VGVS     | GPFLHLHLVL   |
| Fragilariopsis_cylindrus_7      | -NNGRILPTQLSLTLVVME   | ----- | MLKALS   | AV | SVN  | DSLL | --- | KVPPWKNKYLL  | VGVS     | GPFLHLHLVL   |
| Fragilariopsis_cylindrus_8      | -NNGRILPTQLSLTLVVME   | ----- | MLKALS   | AV | SVN  | DSLL | --- | KVPPWKNKYLL  | VGVS     | GPFLHLHLVL   |
| Pseudo-nitzschia_multiseriata_1 | -EAGRTLPTQLSLTLVLCME  | ----- | MLKALS   | AV | SMN  | DSLF | --- | KVAPWQNKWLL  | MGVAG    | GPFLHLHLSVL  |
| Thalassiosira_pseudonana_2      | ---DLATPOTLALTLVTTTE  | ----- | LLKALC   | TV | SVD  | SSIL | --- | TVPPQKNPWL   | ILGVAV   | PFALNLGII    |
| Ostreococcus_lucimarinus_1      | --AGKVKASTLSLTLVLAIE  | ----- | MFNALN   | AI | SED  | GSLV | --- | TMPPWRNPYLL  | IAMLV    | SFGLSHFLIM   |
| Zea_mays_1                      | --GGKIKATTLSSLVLAIE   | ----- | MFNSLN   | AI | SED  | GSLV | --- | SMPPWVNPWLL  | LAMSV    | SFGLHFLIL    |
| Oryza_sativa_1                  | --GGKIKATTLSSLVLAIE   | ----- | MFNSLN   | AI | SED  | GSLV | --- | SMPPWVNPWLL  | LAMSV    | SFGLHFLIL    |
| Aquilegia_caerulea_1            | --TGKVKAMTLLSLSVLAIE  | ----- | MFNSLN   | AI | SED  | GSLV | --- | VMPPWVNPWLL  | LAMSV    | SFGLHFLIL    |
| A.thaliana_AT1G07810.1          | --QGKIKASTLSLSSLVLAIE | ----- | MFNSLN   | AI | SED  | GSLV | --- | TMPPWVNPWLL  | LAMAV    | SFGLHFVIL    |
| A.thaliana_AT1G07670.1          | --QGKIKASTLSLSSLVLAIE | ----- | MFNSLN   | AI | SED  | GSLV | --- | TMPPWVNPWLL  | LAMAV    | SFGLHFVIL    |
| Medicago_truncatula_1           | --TGKVKAMTLLSLSVLAIE  | ----- | MFNSLN   | AI | SED  | GSLV | --- | TMPPWVNPWLL  | LAMSV    | SFGLHFLIL    |
| Glycine_max_1                   | --TGKVKAMTLLSLSVLAIE  | ----- | MFNSLN   | AI | SED  | GSLV | --- | TMPPWVNPWLL  | LAMSV    | SFGLHFLIL    |
| Glycine_max_2                   | --TGKVKAMTLLSLSVLAIE  | ----- | MFNSLN   | AI | SED  | GSLV | --- | TMPPWVNPWLL  | LAMSV    | SFGLHFLIL    |
| Aquilegia_caerulea_2            | --AGKVKAMTLLSLSVLSIE  | ----- | MFNSLN   | AI | SED  | GSLV | --- | VMPPWVNPWLL  | LAMSV    | SFGLHFLIL    |
| Selaginella_moellendorffii_1    | --DGKVKASTLSLSSLVLAIE | ----- | MFNSLN   | AI | SED  | GSLV | --- | VMPPWVNPWLL  | LAMSV    | SFGLHFLIL    |
| Physcomitella_patens_1          | --TGKVKATTLSSLVLAIE   | ----- | MFNSLN   | AI | SED  | GSLV | --- | SMPPWVNPWLL  | LAMGL    | SFGLHFLIL    |
| Physcomitella_patens_2          | --TGKVKATTLSSLVLAIE   | ----- | MFNSLN   | AI | SED  | GSLV | --- | SMPPWVNPWLL  | LAMAV    | SFGLHFLIL    |
| Physcomitella_patens_3          | --TGKVKATTLSSLVLAIE   | ----- | MFNSLN   | AI | SED  | GSLV | --- | QIPPPWMNPWLL | IAMLS    | SFGLHFVLV    |
| Selaginella_moellendorffii_2    | --AGKVKATTLSSLVLAIE   | ----- | MFNSLN   | AI | SED  | GSLV | --- | VMPPWRNPWLL  | VAMAASI  | GLHFIIIL     |
| Glycine_max_3                   | --VGKIKAMTLLSLSVLAIE  | ----- | MFNSLN   | AI | SEE  | NSLR | --- | KLPPWRNPWLL  | VAMSI    | SFGLHCLIL    |
| Glycine_max_4                   | --VGKIKAMTLLSLSVLAIE  | ----- | MFNSLN   | AI | SEE  | NSLR | --- | KLPPWRNPWLL  | VAMSI    | SFGLHCLIL    |
| Aquilegia_caerulea_3            | --VGKVKAMTLLSLSVLAIE  | ----- | MFNSLN   | AI | SED  | NSLV | --- | TMPPWRNPWLL  | LAMSI    | SFGLHCLIL    |
| A.thaliana_AT4G00900.1          | --LGKVKPMTLSLTLVLAIE  | ----- | MFNSLN   | AI | SED  | NSLL | --- | TMPPWRNPWLL  | VAMTV    | SFALHCVIL    |
| Chlamydomonas_reinhardtii_1     | --AGKAKASTLSLSSLVLAIE | ----- | MFNALN   | AI | SED  | GSLV | --- | TMPPWANPWLL  | LAIASI   | SFGLHCVIL    |
| Volvox_carteri_1                | --VGKAKASTLSLSSLVLAIE | ----- | MFNALN   | AI | SED  | GSLV | --- | AMPPWSNPWLL  | TAISV    | SVALHCVIL    |
| Micromonas_pusilla_1            | --EGKAKASTLSLTLVVIE   | ----- | MFNACN   | AI | SED  | ISLF | --- | VMPPWINPWL   | MVAMSV   | SFGLHFLIL    |
| Micromonas_sp_1                 | --AGKIKASTLSLTLVVIE   | ----- | MFNACN   | AI | SED  | ISLV | --- | IMPPWINPWL   | ILAMF    | SFGLHFLIL    |
| Selaginella_moellendorffii_3    | --VGKIKPSTLAMSTLVMIE  | ----- | MFNALN   | AI | SET  | NSLL | --- | KVRPWANKWLL  | VAVASL   | GLHGTTIL     |
| Thalassiosira_oceanica_2        | --DGKAKASTLSLSSLVLAIE | ----- | MFNALN   | AI | SED  | GSLV | --- | TMPPWANPYLL  | LAMVSV   | GMHFVIL      |
| Thalassiosira_pseudonana_3      | --DGKVKASTMSSLVLAIE   | ----- | MFNALN   | AI | SED  | GSLV | --- | TMPPWSNPYLL  | LAMVSV   | GMHFVIL      |
| Pseudo-nitzschia_multiseriata_2 | --KGKMKASTLSLSSLVLTIE | ----- | MFNALN   | AV | SED  | GSLV | --- | TIPPWVNPYLL  | LAMASS   | SFILHFMIL    |
| Fragilariopsis_cylindrus_9      | --KGKMKASTLSLSSLVLTIE | ----- | MFNALN   | AV | SED  | GSLV | --- | TIPPWVNPYLL  | LAMASS   | SFILHFMIL    |
| Fragilariopsis_cylindrus_10     | --KGKMKASTLSLSSLVLTIE | ----- | MFNALN   | AV | SED  | GSLV | --- | TIPPWVNPYLL  | LAMASS   | SFILHFMIL    |
| Aquilegia_caerulea_4            | ---DDRRPSTVSMTLVVVVE  | ----- | MFNALNN  | L  | SEN  | QSLV | --- | VIAPWSNLWL   | VGSII    | LTMLLHILIL   |
| Glycine_max_5                   | ---DDRHPSTVSMTLVVVVE  | ----- | MFNALNN  | L  | SEN  | QSLV | --- | VIPPWSNLWL   | VASII    | LTMLLHMLIL   |
| Medicago_truncatula_2           | ---EDRHPSTVAMTLVVVVE  | ----- | MFNALNN  | L  | SEN  | QSLV | --- | VIPPWSNLWL   | VGSIVL   | LTMLLHILIL   |
| A.thaliana_AT1G10130.1          | ---EDRHPSTVAMTLVVVVE  | ----- | MFNALNN  | L  | SEN  | QSLV | --- | VITPRSNLWL   | VGSII    | LTMLLHVLIL   |
| Oryza_sativa_2                  | ---EDRHPSTVSMTLVVVVE  | ----- | MFNALNN  | L  | SEN  | QSLV | --- | AIHPWSNLWL   | VGSIVL   | LTMLLHSIVL   |
| Selaginella_moellendorffii_4    | ---RDRHPSTISMSVLVVVE  | ----- | MFNAMNN  | L  | SEN  | QSLV | --- | VLPWWSNMWLM  | ASIGV    | SMLLHFLIL    |
| Micromonas_pusilla_2            | ---KNRSPSTMSMSVLVVVE  | ----- | MFNALN   | L  | SEN  | GSLV | --- | THPPWSNYWLL  | CAICV    | SMLLHCVIL    |
| Micromonas_sp_2                 | ---KNRGPSTVSMITLVVVE  | ----- | MFNALN   | L  | SEN  | ESLL | --- | SQSPSSNPWL   | VGAIVS   | LMLLHVAIL    |
| Volvox_carteri_2                | ---ESQHPRTIAMSVLVVVE  | ----- | MFNALNN  | L  | SEN  | SSLL | --- | VIPPWDNRWLL  | CAIATSM  | LHFFIL       |
| Chlamydomonas_reinhardtii_2     | ---GSRHPRTIAMSVLVVVE  | ----- | MFNALNN  | L  | SED  | ASLL | --- | TIPPWDNRWLL  | CAIATSL  | GLHALIIL     |
| Dunaliella_salina_1             | ---HSKHPTTISMSVLVVVE  | ----- | MFNALNN  | L  | SED  | SSLL | --- | RIPPWDNRWLL  | VGAIATSM | LHFGIIL      |
| Ostreococcus_lucimarinus_2      | ---KDRRPSTMMAMSTLVVIE | ----- | MFNALNS  | L  | SEN  | KSLF | --- | SHPPTTNVWLL  | VSI      | SMLLHFIIM    |
| Phaeodactylum_tricornutum_2     | DGAVNRRDITMTFMFCNCD   | ----- | LFNAYVC  | R  | SAD  | KPFY | --- | KINLYSNPAFL  | WAI      | IGGSVVGQFLVV |
| Chlamydomonas_reinhardtii_3     | GGYNLKQRRSEAFNVLVGAQ  | ----- | IAYFVNC  | R  | FIK  | SCFH | --- | PRVFFGNPIV   | YISIAL   | VAGIMVFTV    |
| Chlamydomonas_reinhardtii_4     | GGYPLKQORAEAFNTLVGAQ  | ----- | VAYFVSC  | R  | FLK  | SSFH | --- | PRVFFGNPIA   | YVSIS    | IVAALMVFTV   |
| Thalassiosira_pseudonana_4      | AEDRLAMIRAVSFNVLDFGA  | ----- | MSVMMSAR | F  | SYN  | SSFH | --- | PRVFKGNPAAL  | ASCAI    | IVTLQIALT    |
| Thalassiosira_pseudonana_5      | SDDKMMMRRAVSFNILDFGA  | ----- | ISVTLAR  | F  | FAYN | SSMT | --- | LNILRGNPAVL  | FVS      | VTVTLVQVFLT  |

|                                |                        |                                     |                              |
|--------------------------------|------------------------|-------------------------------------|------------------------------|
| Fragilariopsis_cylindrus_11    | YKTVTHMVHSQASNTLTFGA   | CFVTF SARFNLL SSFH                  | PRLFRGNVFTWYSFAIVTVLQLCIT    |
| Fragilariopsis_cylindrus_12    | YKTVTHMVHSQASNTLTFGA   | CFVTF SARFNLL SSFH                  | PRLFRGNVFTWYSFAIVTVLQLCIT    |
| Pseudo-nitzschia_multiseriis_3 | SKDSINRVHSQASNTLTFGA   | CFVTL SARFSYQ NSLH                  | PRAFQDNVFTYSLIYAVLQLAIT      |
| Phaeodactylum_tricornutum_3    | LGTYLLEETRSQALNTLSFGA  | ISVTMSARFSRK SAFH                   | ARTFQGNPIAWWSYIMVMLQVFIIT    |
| Micromonas_pusilla_3           | TTTSIRRARTTAFIALVYAE   | NFRAYCSR SFE                        | NGVWVKPFSNMTMNKAIIFAQLALYFAL |
| Micromonas_sp_3                | EESIRRARTATFISLVWAE    | GVRAYCSR SFE                        | NPIWVNMFSNMSMNKAVLLAQVTLIAL  |
| Chlamydomonas_reinhardtii_5    | YLLSYKPAHSVLFNAFILAQ   | VANAFVSR RIGLELNF                   | FKGLAHSPIFNNGIMVLITLQVLM     |
| Chlamydomonas_reinhardtii_6    | YLKSYKPAHSVLFNAFILAQ   | VANAFVSR RIOLEYNF                   | FKGLANSHIFNAIMVLITLQAIM      |
| Volvox_carteri_3               | LLKSYKPAHSVLFNAFILAQ   | VANAFVSR RIGLELNF                   | FKGLPRSYIFNVIMVLITLQVVM      |
| Volvox_carteri_4               | LLKSYKPAHSVLFNAFILAQ   | VANAFVSR RIGLELNF                   | FKGLPRSYIFNVIMVLITLQVVM      |
| Volvox_carteri_5               | NEDEYKRPLSLLFNIFICTQ   | VANEINAR RINDEYNV                   | FEGLFGNWIFLAVITITMGLQAI      |
| Chlamydomonas_reinhardtii_7    | EIDEYKRPLSLLFNIFICTQ   | VANEINAR RINDEYDI                   | FSGLFTNWIFMAVLAITMGAQAI      |
| Chlamydomonas_reinhardtii_8    | MHDEYIHVLSCLFNAFIFCQ   | IFNEINAR RINDEYTI                   | FVGLFTNPIFCVIAITVVFQV        |
| Volvox_carteri_6               | TDDEYRPVLSILFNAFIFCQ   | IFNEINAR RINDEYTI                   | FTGLFTNPIFVTVIAVTAVFQ        |
| Ostreococcus_lucimarinus_3     | CHHQTLLELNGFIFNAFVFMQ  | VFSEINSR RIA DVNV                   | FANIHNSPIFCGIIALTVGVQV       |
| Micromonas_sp_4                | GHYRTL RVNSVIFNAFVFMQ  | IFSEINSR KIS EWNV                   | FEGLGNSPIFCFIIFLTIQTAAFI     |
| Selaginella_moellendorffii_5   | C--KNVLRNTIIFNSFVLCQ   | VFNEINAR KLO KLVN                   | LKGVFQSFLFCVIGVIVLQIV        |
| A.thaliana_AT3G21180.1         | HAHAVEVKNTMIFNAFVMCQ   | IFNEFNAR KPD EMNV                   | FRGVNKNPLFVAIVGVTFILO        |
| Aquilegia_caerulea_5           | ---DQAANTLIFNAFVLCQ    | IFNEFNAR KPD EMNV                   | FGGITKNRFLMAIVGVTLVQL        |
| A.thaliana_AT5G57110.2         | HEHATRVKNTIIFNAFVLCQ   | AFNEFNAR KPD EKNV                   | FKGVIKNRLFMGIIVITLVLQ        |
| Oryza_sativa_3                 | QAHADKVKNTFIFNTFVLCQ   | VFNEFNAR KPD ELNI                   | FKGITGNHLFMAIVATVVFQ         |
| Zea_mays_2                     | PAHADKVKNTFIFNTFVLCQ   | VFNEFNAR KPD ELNI                   | FKGISGNHLFGIIVITVILQ         |
| Zea_mays_3                     | WEHAEKTKNTFVFNAFVFCQ   | IFNEFNAR KPE EKNV                   | FKGVANNHLFVAIVGATTVL         |
| Zea_mays_4                     | RSDAEKINTFIFNTFVFCQ    | IFNEFNAR KPE EKNV                   | FKGVTKNHLFMGIIGITTVFQ        |
| Selaginella_moellendorffii_6   | ---GNRKLNTIIFNSFVLCQ   | LFNEVNSR KPD KLVN                   | FSGFFRNPLFCGVVSVTAVLQ        |
| Selaginella_moellendorffii_7   | EGVAHEKLVCIIFNAFVFCQ   | VFNEFNAR NPE KLVN                   | FKGFTSNRFLMGVILFTAIVQ        |
| Aquilegia_caerulea_6           | ---SDLILNNTLIFNSFVFCQ  | VFNEISSR EME KIDV                   | FEGLDNNVVFVTVLSATCIFQ        |
| Medicago_truncatula_3          | ---SDLVLNNTLIFNAFVFCQ  | VFNEISSR EME KINV                   | FKGILDNYVVFVGVISATIFFQ       |
| A.thaliana_AT2G22950.1         | ---STLVLNNTLIFNCFVFCQ  | VFNEVSSR EME EIDV                   | FKGILDNYVVFVVIGATVFFQ        |
| A.thaliana_AT4G37640.1         | ---STLMLNNTLIFNCFVFCQ  | VFNEISSR EME EIDV                   | FKGILDNYVVFVVIGATVFFQ        |
| Oryza_sativa_4                 | ---SDLVLNNTLIFNCFVFCQ  | VFNEVSSR EME RINV                   | FEGLDNNVVFVAVLGVSTVIFQ       |
| Zea_mays_5                     | ---SDLVLNNTIIFNCFVFCQ  | VFNEVSSR EME RVNV                   | LRGILDNNVVFAMVLGVSTVVFQ      |
| Oryza_sativa_5                 | ---AEVVLNNTIIFNSFVFCQ  | VFNEISSR EME KINV                   | LRGILKNYVFLGVLTSTVVFQ        |
| A.thaliana_AT1G27770.1         | ---SDLTLNNTLIFNIFVFCQ  | VFNEISSR EME KIDV                   | FKGILKNYVVFVAVLTCVTVFQ       |
| Oryza_sativa_6                 | ---ADIVLNNTIIFNTFVFCQ  | VFNEISSR EME DINV                   | LRGMAGNSIFLGVLTGTIFFQ        |
| Zea_mays_6                     | ---ANTVLNNTIIFNTFVFCQ  | VFNEISSR DME EINV                   | LKGLPQNSIFMSILGGTIFQ         |
| Aquilegia_caerulea_7           | ---ADSVLNNTFIFNTFVFCQ  | VFNEISSR DME KINV                   | FRGMFQSWVFIAVMIATVVFQ        |
| Oryza_sativa_7                 | ---SDKTINTLIFNSFVFCQ   | ESVLYFNGNFTILEKVSGGTLRYFLKEGKISLILT | LOGIFRNWIFVGIILTATVIFQ       |
| Selaginella_moellendorffii_8   | ---DTLTLNNTLIFNVFVFCQ  | VFNELNAR DME KLVN                   | FKHTFNNTITFLLVILFTVVFQ       |
| Selaginella_moellendorffii_9   | ---GKLVNNTIIFNTFVFFCQ  | VFNEFNAR EMD KINV                   | FRHL-DNRFFLAIVTATVVFQ        |
| Oryza_sativa_8                 | AGAGERANGTMIFNAFVLCQ   | VFNEFNAR EIE RRNV                   | FAGVHRNRMFLGIVAVTVALQ        |
| Fragilariopsis_cylindrus_13    | ---GSTHHFTILFNAFVFCQ   | VFNEFNAR EIGDVFDP                   | VGSLEKSPMFLVIVFTVFSQ         |
| Pseudo-nitzschia_multiseriis_4 | ---GSIHHFTIIFNAFVFCQ   | IFNEFNAR EIGDVFDP                   | IGALGQSPMFLVIVFTVISQ         |
| Phaeodactylum_tricornutum_4    | ---GSRHHFTILFNAFVFCQ   | VFNEFNAR EIGDRFDP                   | LRSLSESPMFLVIVFTMVAQ         |
| Thalassiosira_pseudonana_6     | ---ENSIIHYTLIFNTFVWMCQ | LFNEINSR NLEGEFNV                   | FRGIQRNPLFGILLTAMLV          |
| Phaeodactylum_tricornutum_5    | EREENS VHVTIIFNTFVWMCQ | LFNEINSR KLGESNV                    | FKGVLDNYIFCTILLTSCLO         |
| Phaeodactylum_tricornutum_6    | DRDVNTVHYTLIFNAFVWMCQ  | LFNEINCR KLGEGINV                   | FEGLLNPMFCGILFTTAVLQ         |

|                                 |                  |       |       |             |       |                                   |                 |
|---------------------------------|------------------|-------|-------|-------------|-------|-----------------------------------|-----------------|
| Skeletonema_marinoi_ABC         | YSAEL            | ----- | GFP   | GLAKS       | FGLVP | LSLHDWEIALKWSAPILIVEEILKFFG       | ---             |
| Thalassiosira_pseudonana_1      | YSSKL            | ----- | GLP   | GLAKS       | FGLVP | LSLHDWK TALKWSAPILIVEEMLKAAGRHR   |                 |
| Thalassiosira_oceanica_1        | YSSKL            | ----- | GLP   | GLAKS       | FGLVS | -----                             | HRCSQKRV        |
| Phaeodactylum_tricornutum_1     | YSSDL            | ----- | GIP   | ALGES       | FGMVP | LSIDDWALVLSWAAPILLVDEILKAIGRWV    |                 |
| Fragilariopsis_cylindrus_1      | YSSKLSLGLGGSNKYL | ----- |       |             | VP    | LTVEEWKT VLLWASPILLVDEILKCI GRRL  |                 |
| Fragilariopsis_cylindrus_2      | YSSKLSLGLGGSNKYL | ----- |       |             | VP    | LTVEEWKT VLLWASPILLVDEILKCI GRRL  |                 |
| Fragilariopsis_cylindrus_3      | YSSKLSLGLGGSNKYL | VGLS  | GFGKA | FGMVP       |       | LTVEEWKT VLLWASPILLVDEILKCI GRRL  |                 |
| Fragilariopsis_cylindrus_4      | YSSKLSLGLGGSNKYL | VGLS  | GFGKA | FGMVP       |       | LTVEEWKT VLLWASPILLVDEILKCI GRRL  |                 |
| Fragilariopsis_cylindrus_5      | YSSKLSLGLGGSNKYL | VGLS  | GFGKA | FGMVP       |       | LTVEEWKT VLLWASPILLVDEILKCI GRRL  |                 |
| Fragilariopsis_cylindrus_6      | YSSKLSLGLGGSNKYL | VGLS  | GFGKA | FGMVP       |       | LTVEEWKT VLLWASPILLVDEILKCI GRRL  |                 |
| Fragilariopsis_cylindrus_7      | YSSKLSLGLGGSNKYL | VGLS  | GFGKA | FGMVP       |       | LTVEEWKT VLLWASPILLVDEILKCI GRRL  |                 |
| Fragilariopsis_cylindrus_8      | YSSKLSLGLGGSNKYL | VGLS  | GFGKA | FGMVP       |       | LTVEEWKT VLLWASPILLVDEILKCI GRRL  |                 |
| Pseudo-nitzschia_multiseriata_1 | YSSRL            | ----- | GLP   | GFGKA       | FGMVS | LTKEHWKT VLFWSTPILLVDELLKFI GRRL  |                 |
| Thalassiosira_pseudonana_2      | YN               | ----- | P     | ALSNS       | FGLVP | LTVDWIHVMLWSSPVLIDEALKYASRQA      |                 |
| Ostreococcus_lucimarinus_1      | YV               | ----- | P     | YFAEI       | FSIVP | LD FNEWMLVLLCAAPVCLIDEVLKVFGRVS   |                 |
| Zea_mays_1                      | YV               | ----- | P     | FLAQV       | FGIVP | LSLNEWLLVVAFAFPVVLIDEVLKVFGRCL    |                 |
| Oryza_sativa_1                  | YV               | ----- | P     | FLAQV       | FGIVP | LSFNEWLLVIAVAFPPVVLIDEVLKVFGRCL   |                 |
| Aquilegia_caerulea_1            | YV               | ----- | P     | FLAQV       | FGIVP | LSLNEWLLVLAVALPVILIDEVLKVFGRCT    |                 |
| A.thaliana_AT1G07810.1          | YV               | ----- | P     | FLAQV       | FGIVP | LSLNEWLLVLAVALPVILIDEVLKVFGRCT    |                 |
| A.thaliana_AT1G07670.1          | YV               | ----- | P     | FLAQV       | FGIVP | LSLNEWLLVLAVALPVILIDEVLKVFGRCT    |                 |
| Medicago_truncatula_1           | YV               | ----- | P     | FLAKV       | FGIVP | LSFNEWLLVLAVALPVILIDEVLKVFGRCT    |                 |
| Glycine_max_1                   | YV               | ----- | P     | FLAQV       | FGIVP | LSFNEWLLVLAVALPVILIDEVLKVFGRCT    |                 |
| Glycine_max_2                   | YV               | ----- | P     | FLAQV       | FGIVP | LSFNEWLLVLAVALPVILIDEVLKVFGRCT    |                 |
| Aquilegia_caerulea_2            | YV               | ----- | P     | FLAQV       | FGIVP | LSLNEWFLVLAVALPVILIDEVLKVFGRCT    |                 |
| Selaginella_moellendorffii_1    | YV               | ----- | P     | FLANI       | FGIVP | LSFNEWLLVIVSFPVILIDEVLKVFGRKM     |                 |
| Physcomitella_patens_1          | YI               | ----- | P     | FLAKI       | FGIVP | LSLLEWLLVLAVALPVILIDEVLKFI GRRM   |                 |
| Physcomitella_patens_2          | YI               | ----- | P     | FLATI       | FGIVP | LSLNEWLLVLAVALPVILIDEGLKFI GRRM   |                 |
| Physcomitella_patens_3          | YV               | ----- | P     | VLASI       | FGIVP | LNSNEWLLVLAVALPVILIDEVLKFI GRRM   |                 |
| Selaginella_moellendorffii_2    | YV               | ----- | P     | LLAQV       | FGIVP | LSWREWLLVLAVALPVILIDEVLKFI GRRM   |                 |
| Glycine_max_3                   | YT               | ----- | P     | FLAEV       | FGVVP | LSLNEWFMVLLISAPVILIDEVLKLVVRSQ    |                 |
| Glycine_max_4                   | YT               | ----- | P     | FLAEV       | FGVVP | LSLNEWFMVLLISAPVILIDEVLKLVVRSQ    |                 |
| Aquilegia_caerulea_3            | YV               | ----- | P     | FLADV       | FGIVP | LT LKEWVVLVLSAPVVVILIDEVLKLVGRSR  |                 |
| A.thaliana_AT4G00900.1          | YV               | ----- | P     | FLANV       | FGIVP | LSFREWVVLVLSAPVVVILIDEALKFI GRCR  |                 |
| Chlamydomonas_reinhardtii_1     | YV               | ----- | P     | FLADV       | FAIVP | LSWPEWQLVLLWSAPVLLIDEVLKAVGRLL    |                 |
| Volvox_carteri_1                | YV               | ----- | P     | FLADV       | FAIVP | LSWPEWQLVLLWSAPVLLIDEVLKAVGRLL    |                 |
| Micromonas_pusilla_1            | YV               | ----- | P     | ALATI       | FSIVP | LDANEWALVCAAPVWVILIDEVLKFI GRNF   |                 |
| Micromonas_sp_1                 | YV               | ----- | P     | ALATI       | FSIVP | LDLNEWLLVCAAPVWVILIDEVLKFI GRNF   |                 |
| Selaginella_moellendorffii_3    | YT               | ----- | P     | WLAEV       | FGVVP | LDWNDWLLVLAVALPVILIDEALKLAGRVF    |                 |
| Thalassiosira_oceanica_2        | YV               | ----- | D     | SLADM       | FNVTP | LDKDEWMLVLAVALPVIFIDEILKFI GRQM   |                 |
| Thalassiosira_pseudonana_3      | YV               | ----- | D     | FLADM       | FNVTP | LDWDEWMLVLAVALPVIFIDEILKFI GRKM   |                 |
| Pseudo-nitzschia_multiseriata_2 | YV               | ----- | P     | WMATI       | FSISP | HDAVDWILVFLSFPVILIDEMLKYVGRGM     |                 |
| Fragilariopsis_cylindrus_9      | YV               | ----- | P     | AMATV       | FSISP | HNTIDWILVFLSFPVILIDEILKYIGRRR     |                 |
| Fragilariopsis_cylindrus_10     | YV               | ----- | P     | AMATV       | FSISP | HNTIDWILVFLSFPVILIDEILKYIGRRR     |                 |
| Aquilegia_caerulea_4            | YV               | ----- | Q     | PLSIL       | FSVTP | LSWAEWTVVLYLSFPVILIDEILKFFSRNS    |                 |
| Glycine_max_5                   | YV               | ----- | H     | PLSVL       | FSVTP | LSWTDWTVVLYLSFPVILIDEVLKFFSRNP    |                 |
| Medicago_truncatula_2           | YV               | ----- | R     | PLSVL       | FSVTP | LSWADWMAVLYLSFPVILIDEILKFFSRNP    |                 |
| A.thaliana_AT1G10130.1          | YV               | ----- | H     | PLAVL       | FSVTP | LSWAEWTVVLYLSFPVILIDEILKFFSRNP    |                 |
| Oryza_sativa_2                  | YI               | ----- | E     | PLSAL       | FS    | -----                             | VILIDEVLKFFSRSS |
| Selaginella_moellendorffii_4    | YL               | ----- | R     | PLSLL       | FSVTP | LSWAEWKAVLWFSFPVILIDEVLKVLRSQT    |                 |
| Micromonas_pusilla_2            | YV               | ----- | P     | WLAST       | FSVAP | LSTAEWNAVILKFSFPVILDEED           | -----           |
| Micromonas_sp_2                 | YV               | ----- | P     | WLATI       | FSVTP | LSSHEWCAVFWFSFPVILIDEILKFI TRSG   |                 |
| Volvox_carteri_2                | YV               | ----- | G     | PAAAL       | FGVTS | LNGAEWLAVLALSAPVLLDELMKWI SRRV    |                 |
| Chlamydomonas_reinhardtii_2     | YA               | ----- | P     | PAAAL       | FGVTG | LSGAEWAAVWVLSAPVLLDEVMMKALSRNV    |                 |
| Dunaliella_salina_1             | YT               | ----- |       | GASAM       | FGVTG | LSFAEWAMVQLSAPVLLDEVMMKAW SRRR    |                 |
| Ostreococcus_lucimarinus_2      | YV               | ----- | P     | SFAKT       | FTITA | LN YEEWRVAFWFSIPVIFIDEVLKYVTRAH   |                 |
| Phaeodactylum_tricornutum_2     | YV               | ----- | L     | PLOKV       | FQTEA | LT FYDIAYIVLLSSMVLWLDALRKTFFPSV   |                 |
| Chlamydomonas_reinhardtii_3     | YV               | ----- | P     | GVNGF       | FHMTG | SMDGIQWARVVVCTAIVFVIVEVEKALVDPL   |                 |
| Chlamydomonas_reinhardtii_4     | YV               | ----- | P     | GVNGF       | FHMSG | MDGIQWARVVVATFVVYVIVEVEKALVDPL    |                 |
| Thalassiosira_pseudonana_4      | YI               | ----- | P     | GLNSFVFSMNG |       | MDGFGWALVIASMVLVFVVMETEKAI RRR    | ---             |
| Thalassiosira_pseudonana_5      | YT               | ----- | P     | GLNSFVFSMNG |       | MDGFGWALVIAAMVVVFAVME TEKAI RRRNL |                 |

|                                |        |        |               |     |                    |                        |
|--------------------------------|--------|--------|---------------|-----|--------------------|------------------------|
| Fragilariopsis_cylindrus_11    | YI     | -----P | GLNNIIFSMAP   | --M | VAFQWGLVALGGIIVFI  | GLELEKAFRRFL           |
| Fragilariopsis_cylindrus_12    | YI     | -----P | GLNNIIFSMAP   | --M | VAFQWGLVALGGIIVFI  | GLELEKAF----           |
| Pseudo-nitzschia_multiseriis_3 | YI     | -----P | GLNDIVFAMAP   | --M | KAFQWGIICFLGCIIVFI | ALELEKAFRRYL           |
| Phaeodactylum_tricornutum_3    | YT     | -----P | GLNDTIFSMAG   | --M | DGPQWGIIVALFMVVMLV | MEEAEKAVRNYL           |
| Micromonas_pusilla_3           | FC     | -----P | GLNESVLGLVYVE | I   | HGFGWFLAVMGS       | LACLVGCEIYKKIAGQF      |
| Micromonas_sp_3                | YL     | -----P | GLNHV-LGLYVDE | I   | HGWGWFIAFQ         | AVACGVGCCELYKYIAKQF    |
| Chlamydomonas_reinhardtii_5    | QT     | -----  | PISYI-FKVEP   | --L | NGPEWGACIAIGIGAI   | PFSWALRILLRWL          |
| Chlamydomonas_reinhardtii_6    | QT     | -----  | PINYI-FKVNA   | --L | NGEEWGVTIAIGVGAIP  | FSWLVRVVARLV           |
| Volvox_carteri_3               | QT     | -----  | PISFV-FKVKP   | --L | NGAEWGACIAIGIGAI   | PYSWAVRLLAQAV          |
| Volvox_carteri_4               | QT     | -----  | PISFV-FKVKP   | --L | NGAEWGACIAIGIGAI   | PYSWAVRLLAQAV          |
| Volvox_carteri_5               | N      | -----  | FLGLF-FKVEP   | --L | WQEWLASIAIGTGAWP   | VSFLTRLISRNI           |
| Chlamydomonas_reinhardtii_7    | N      | -----  | FLGMF-FKVEP   | --L | WKEWLVSIAIGS       | CAWPLSLITRFISRNI       |
| Chlamydomonas_reinhardtii_8    | NV     | -----  | PFINNKF-FKVN  | --L | NQEWLATVAIGFGTI    | PLSLLTRWLSKVL          |
| Volvox_carteri_6               | NV     | -----  | PFINSKF-FKVQ  | --L | WQEWLVTVAIGLGAIP   | LSLATRFITKVM           |
| Ostreococcus_lucimarinus_3     | QAVGGT | -----  | VVGPA-IGFVE   | --O | NKWEITAIILGVII     | LPVGVVTRLPLKWL         |
| Micromonas_sp_4                | EGVGR  | -----  | VVGPA-IGFMN   | --L | TGGEWAVCIVIGFCAL   | PVGFARQLPLDI           |
| Selaginella_moellendorffii_5   | E      | -----  | FLGKY-FKTR    | --L | ATQYWLICVIGFSLI    | PLACLMLVHVPK           |
| A.thaliana_AT3G21180.1         | T      | -----  | FLGKF-AHTVR   | --L | WQWLASIIIGLVS      | WPLAIVGKLIIPVK         |
| Aquilegia_caerulea_5           | E      | -----  | FLGKF-TDTIK   | --L | NWKQWLVSAIGAI      | SWPLAAGKLIIPVE         |
| A.thaliana_AT5G57110.2         | E      | -----  | FLGKF-ASTTK   | --L | NWKQWLVICVIGVIS    | WPLALVGKFIIPVA         |
| Oryza_sativa_3                 | E      | -----  | FLGKF-TSTTR   | --L | TWQWLVSIGLAFFS     | WPLAFVGGKLIIPVE        |
| Zea_mays_2                     | E      | -----  | FLGKF-ASTVR   | --L | WQWLVSIGLAFFS      | WPLAFVGGKLIIPK         |
| Zea_mays_3                     | E      | -----  | FLGKF-FDTAR   | --L | WRLLWLSVAIGAVS     | WPLAYLGGKFIIPVPV       |
| Zea_mays_4                     | C      | -----  | FLGKF-FKIVR   | --L | WRLLWLSVAIGLVS     | WPLAYVGGKFIIPVPV       |
| Selaginella_moellendorffii_6   | F      | -----  | FLGKF-FKTR    | --L | WNHWLVSIVVGF       | SLVVGFFGKLIIPVK        |
| Selaginella_moellendorffii_7   | E      | -----  | YGGTI-VSTVH   | --L | WNHWILCIILGAI      | SLPLAALVKKLIIPD        |
| Aquilegia_caerulea_6           | E      | -----  | FLGTF-ANTHP   | --L | SFSQWFLSVFLG       | FLGMPIAAAVKMIPVGV      |
| Medicago_truncatula_3          | E      | -----  | YLGTF-ANTTP   | --L | TLVQWFFCLFV        | GFMGMPIAARLKKIPV--     |
| A.thaliana_AT2G22950.1         | E      | -----  | FLGTF-ASTTP   | --L | TIVQWFFSIFV        | GFLGMPAAAGLKKIPV--     |
| A.thaliana_AT4G37640.1         | E      | -----  | FLGTF-ASTTP   | --L | TITQWIFSI          | FIFGFLGMPAAAGLKTIPV--  |
| Oryza_sativa_4                 | C      | -----  | FLGDF-ANTTP   | --L | TLKQWFNCIF         | IFGFIGMPIAAAVKLIIPVDE  |
| Zea_mays_5                     | C      | -----  | CLGSF-ANTTP   | --L | SVAQWACVAIGF       | VGMPPVAVAVKMPVE-       |
| Oryza_sativa_5                 | C      | -----  | FLGEF-ANTIP   | --L | TRLQWIASVLLG       | LIGMPIASAIKLLPVGS      |
| A.thaliana_AT1G27770.1         | E      | -----  | LLGTF-ADTTP   | --L | LGQWLVSIILG        | FLGMPVAAALKMIPVGS      |
| Oryza_sativa_6                 | C      | -----  | FLGDF-ANTTP   | --L | TQQWLVSIILF        | GFLGMPIAAAIKLIAVEP     |
| Zea_mays_6                     | C      | -----  | FLGDF-ANTTP   | --L | THLQWLVSIILF       | GLLGMPIAAAIKLIIPVEP    |
| Aquilegia_caerulea_7           | C      | -----  | FLGTF-ANTVP   | --L | NWQWLVSVLIG        | AVSMVIAVIKFIIPVKE      |
| Oryza_sativa_7                 | E      | -----  | FLGTF-ANTVP   | --L | SGELWLVSVVIG       | SISMIISVILKCIIPVEF     |
| Selaginella_moellendorffii_8   | E      | -----  | FLGKL-ADTTP   | --L | NAKQWLVSVLLG       | AIQVPLAMLGKLIIPVA      |
| Selaginella_moellendorffii_9   | E      | -----  | WLGSV-ASTTP   | --L | SPCQWLF            | CVGVASLSLVVDVAVKAIHGLW |
| Oryza_sativa_8                 | E      | -----  | LLTKF-AGTER   | --L | GWQWACVGI          | AAVSWPIGWAVKCIIPVE     |
| Fragilariopsis_cylindrus_13    | E      | -----  | YGGDF-TQTQP   | --L | SLDEWKITVGY        | GAMSIPIGWLMRKIPVNE     |
| Pseudo-nitzschia_multiseriis_4 | E      | -----  | YGGDF-TQTTP   | --L | SMEEWMTIAY         | GALSIPIGFFMRLIPVSE     |
| Phaeodactylum_tricornutum_4    | E      | -----  | FGGDF-TQYTP   | --L | SEEWKITVGL         | GAIPLPVGFFMRLIPVSE     |
| Thalassiosira_pseudonana_6     | E      | -----  | FGGKA-MVHEDGL | D   | GMVWVSI            | ALGSGSLLVQVINIV---     |
| Phaeodactylum_tricornutum_5    | E      | -----  | FGSLA-FKVAES  | G   | LARSFWALSLIL       | GAGSLPVQVINQLYRLG      |
| Phaeodactylum_tricornutum_6    | E      | -----  | FGSLA-FKVADD  | G   | LARSFWALSMIL       | GFGSLPVQQLINQFYNVA     |

### Supplementary figure 8.

Alignment of the ABC-transporter domains used in the phylogenetic analysis presented in supplementary figure 7. The length of the alignment has been adjusted to the length of the domain identified in *S. marinoi*. Numbers above the sequences indicate the positions in the alignment and the background color of the letters indicates size, shape, solubility, and ionization properties of the different amino acids.
